# Supplementary material for: Oxidative trimerization of indoles via water-assisted visible-light photoredox catalysis and the study of their anti-cancer activities
Source: Royal Society of Chemistry journal article supplement (doi:10.1039/d0ob01298j), 2020-01-01
Supplement: d0ob01298j1.pdf [file d0ob01298j1.pdf]

## Supporting Information

### Oxidative Trimerization of indoles via Water-Assisted Visible-Light Photoredox Catalysis and the Study of Their Anti-Cancer Activities.

Li-Ting Cheng,<sup>a</sup> Sheng-Qi Luo,<sup>a</sup> Bor-Cherng Hong,<sup>\*,a</sup> Chia-Ling Chen,<sup>b</sup> Wen-Shan Li,<sup>\*,b</sup> and Gene-Hsiang Lee<sup>c</sup>

<sup>a</sup> Department of Chemistry and Biochemistry, National Chung Cheng University, Chiayi, 621, Taiwan.

<sup>b</sup> Institute of Chemistry, Academia Sinica, Taipei 115, Taiwan.

<sup>c</sup> Instrumentation Center, National Taiwan University, Taipei, 106, Taiwan.

#### SUPPORTING INFORMATION:

Contents:

- (1) Experimental procedures and characterization data for compounds.....Page S1–S27
- (2) Spectra for compounds.....Page S27–S89

**General Procedure.** All solvents were reagent grade. Reactions were normally carried out in pear-shaped flasks or glass vials with screw cap. Thin-layer chromatography (TLC) was performed on Merck silica gel 60 F<sub>254</sub> glass plates. <sup>1</sup>H NMR spectra were obtained in CDCl<sub>3</sub> unless otherwise noted at 400 MHz (Bruker DPX-400, Bruker Ascend™ 400) or 500 MHz (Varian-Unity INOVA-500). <sup>13</sup>C NMR spectra were obtained at 125 MHz or 100 MHz. IR spectra were recorded on Bruker Alpha FT-IR spectrometer or PerkinElmer Spectrum Two FT-IR Spectrometer L160000A with Universal ATR (UATR) sampling accessory. The melting point was recorded on a melting point apparatus (MPA100–Automated melting point system, Stanford Research Systems, Inc.) and is uncorrected. ESI ionization time-of-flight mass (ESI-TOF MS) spectral data were obtained on a JMS-T100LP 4G(JEOL) mass spectrometer equipped with the ESI source, detecting positive and negative ions. Typical measurement conditions are as follows: needle voltage: 2000 kV, orifice 1 voltage: 40 V, ring lens voltage: 10 V, spray temperature: 250°C. LEDs were purchased from shop.cpu.com.tw. 12V DC, 180 mA, LED type: SMD5050 (5x5 mm), 18 LED in each trip, size of a trip: 300 (L) x 10 (W) x 3.3 (D) mm. For blue LED, product no: 4105-18B ( $\lambda_{\max}$  = 465-467.5 nm); for green LED, product no: 4105-18G ( $\lambda_{\max}$  = 514.7 nm); for white LED, product no: 4105-18W. For CFL: 24 W Philips Tornado daylight compact fluorescence light.

## Cell culture

Human breast carcinoma MDA-MB-231 cell, lung carcinoma A549 cell, and cervical epithelioid carcinoma HELA cell were purchased from Bioresource Collection and Research Center (BCRC 60425, 60074, and 60005 respectively). Cells maintained in Dulbecco's modified Eagle's medium (DMEM; HyClone) with 10% fetal bovine serum (FBS; Biological industries), 2 mM L-glutamine and antibiotics (containing 100 mg/L Streptomycin and 100 U/mL Penicillin G). All of cancer cell lines were maintained in a humidified incubator with 5% CO<sub>2</sub> at 37 °C.

## MTT assay

Cancer cells were seeded at a density of  $1.5 \times 10^4$  per well in 96-well culture dishes. After 24 h incubation, the cells were treated with different concentration of 3-indolones **1a–1j** or DMSO as vehicle control for 48 h. Following cells were incubated with 3-(4,5-dimethylthiazol-2-yl)-2,5-diphenyltetrazolium bromide (1 mg/mL, Sigma) at 37 °C for 4 h and then with DMSO at room temperature for 30 min. The spectrophotometric absorbance of the samples was determined by Molecular Devices SPECTRAMax PLUS384 at 540 nm.

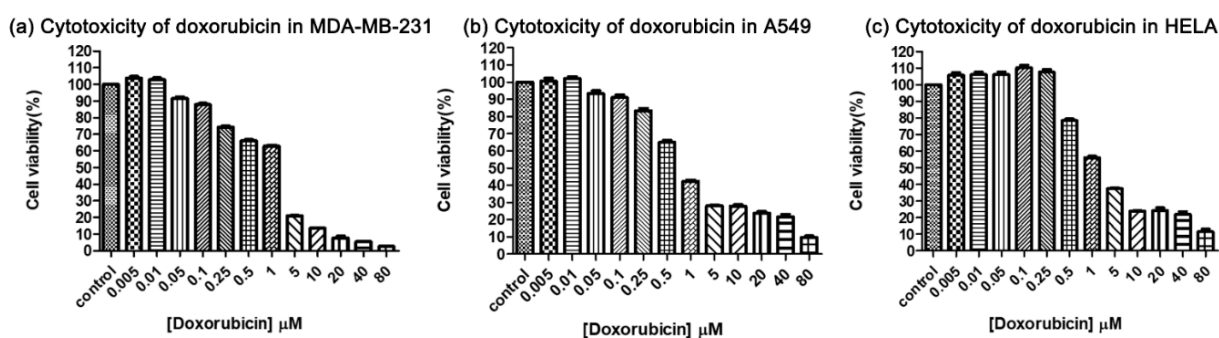

**Fig. S1** Growth inhibition activity of doxorubicin (reference drug) against three cultured human tumor cell lines. Concentration of doxorubicin necessary to inhibit the growth of a panel of human cancer cells by 50% after 48 h exposure. Data are representative of three individual experiments, performed in three replicates ( $IC_{50}$ , mean  $\pm$  SEM,  $n = 3$ ).

## Preparation of [3,2':2',3''-terindolin]-3'-one (**1a**)

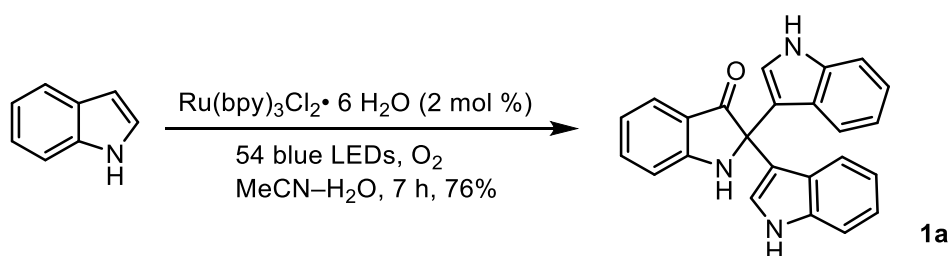

A magnetic stirring bar and indole (46.8 mg, 0.40 mmol) was placed in a 10-mL Schlenk tube vial, followed by sequential addition of  $\text{Ru}(\text{bpy})_3\text{Cl}_2 \cdot 6\text{H}_2\text{O}$  (6.0 mg, 0.01 mmol, 0.02 equiv),  $\text{CH}_3\text{CN}$  (2.4 mL) and  $\text{H}_2\text{O}$  (1.6 mL). The Schlenk tube was equipped with a balloon of oxygen. With careful sealing, a single balloon of oxygen can last for the duration of the reaction without the need to refill

the oxygen gas. The solution was stirred and irradiated with a strip of 54 blue LEDs, located 2-5 cm away from the reaction vial, for 7 h until the completion of the reaction, as monitored by TLC. Upon completion, the reaction solution was diluted with EtOAc and extracted with water and brine. The organic solution was dried over MgSO<sub>4</sub>, and concentrated *in vacuo* to give a crude residue. The crude product was purified by flash column chromatography with 30% EtOAc–hexane to afford **1a** (*R<sub>f</sub>* = 0.39 in 50% EtOAc–hexane; 36.8 mg, 76% yield) as pale yellow solids. Selected data for **1a**:<sup>1</sup> m.p 234–235 °C (decomp.); IR (KBr): 3346, 3059, 2924, 1663, 1614, 1489, 1457, 1329, 1149, 1105, 743 cm<sup>-1</sup>; <sup>1</sup>H NMR (500 MHz, DMSO-d<sub>6</sub>): δ 10.97 (brs, 2 H), 8.13 (s, 1 H), 7.52 – 7.45 (m, 2 H), 7.35 (d, *J* = 8.0 Hz, 2 H), 7.32 (d, *J* = 8.0 Hz, 2 H) 7.09 (d, *J* = 2.5 Hz, 2 H), 7.03 (dd, *J* = 8.0, 8.0 Hz, 2 H), 6.94 (d, *J* = 8.0 Hz, 1 H), 6.83 (dd, *J* = 8.0, 8.0 Hz, 2 H), 6.72 (dd, *J* = 8.0, 8.0 Hz, 1 H); <sup>13</sup>C NMR (125 MHz, DMSO-d<sub>6</sub>): δ 200.8 (C), 160.5 (C), 137.4 (CH), 136.9 (two C), 125.6 (two C), 124.4 (CH), 124.0 (two CH), 121.0 (two CH), 120.5 (two CH), 118.3 (two CH), 117.7 (C), 117.0 (CH), 114.0 (two C), 111.8 (CH), 111.6 (two CH), 67.6 (C);<sup>2</sup> EI-MS (*m/z*, relative intensity): 364 (M<sup>+</sup>+1, 7), 363 (M<sup>+</sup>, 28), 335 (26), 334 (100), 332 (6), 219 (6), 218 (7), 217 (7), 190 (8), 166 (4), 117 (3); exact mass calculated for C<sub>24</sub>H<sub>17</sub>N<sub>3</sub>O (M<sup>+</sup>): 363.1372; found: 363.1365.

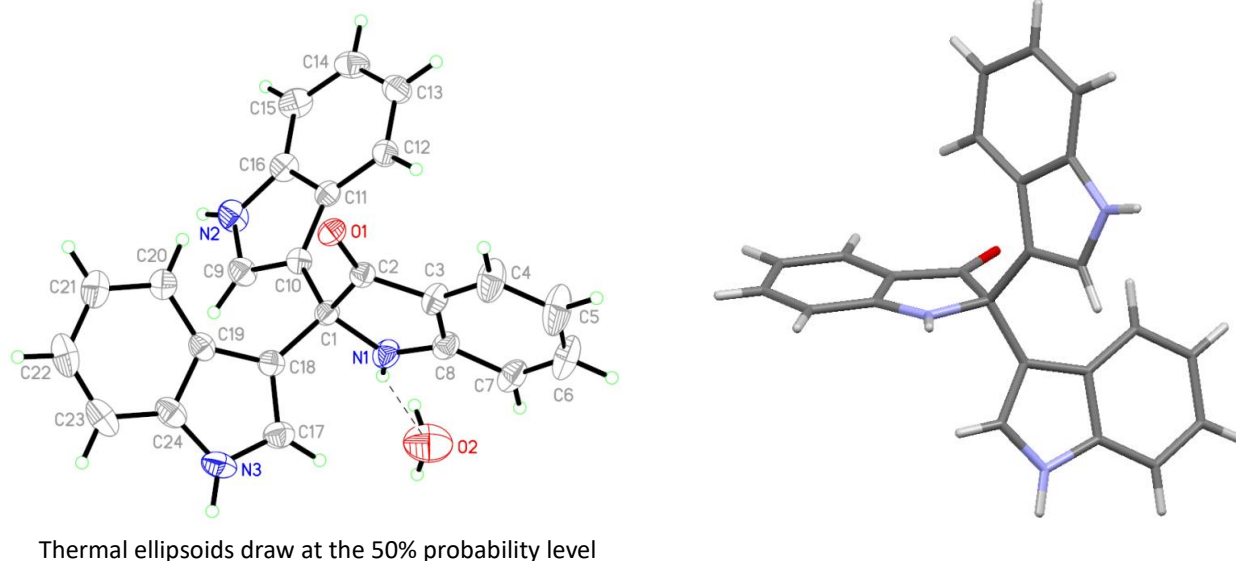

**Figure S2.** ORTEP and Stereo plots for X-ray crystal structures of **1a** (ic19115).

CCDC 2005723 contains the supplementary crystallographic data for **1a** (ic19115). These data can be obtained free of charge from the Cambridge Crystallographic Data Centre via [www.ccdc.cam.ac.uk](http://www.ccdc.cam.ac.uk)

<sup>1</sup> (a) Kothandapani, J.; Reddy, S. M. K.; Thamocharan, S.; Kumar, S. M.; Byrappa, K.; Ganesan, S. S. *Eur. J. Org. Chem.* **2018**, 2762–2767. (b) Azimi, M.; Nafissi-Varcheh, N.; Mogharabi, M.; Faramarzi, M. Ali; Aboofazeli, R. *J. Mol. Catal. B: Enzym.* **2016**, *126*, 69 – 75. (c) Qin, W.-B.; Chang, Q.; Bao, Y.-H.; Wang, N.; Chen, Z.-W.; Liu, L.-X. *Org. Biomol. Chem.* **2012**, *10*, 8814 – 8821.

<sup>2</sup> (a) Kothandapani, J.; Reddy, S. M. K.; Thamocharan, S.; Kumar, S. M.; Byrappa, K.; Ganesan, S. S. *Eur. J. Org. Chem.* **2018**, 2762–2767. (b) Azimi, M.; Nafissi-Varcheh, N.; Mogharabi, M.; Faramarzi, M. Ali; Aboofazeli, R. *J. Mol. Catal. B: Enzym.* **2016**, *126*, 69 – 75. (c) Qin, W.-B.; Chang, Q.; Bao, Y.-H.; Wang, N.; Chen, Z.-W.; Liu, L.-X. *Org. Biomol. Chem.* **2012**, *10*, 8814 – 8821.

Table S1. Crystal data and structure refinement for **1a (ic19115)**.

|                                   |                                                                     |                  |
|-----------------------------------|---------------------------------------------------------------------|------------------|
| Identification code               | ic19115                                                             |                  |
| Empirical formula                 | C <sub>24</sub> H <sub>17.19</sub> N <sub>3</sub> O <sub>1.10</sub> |                  |
| Formula weight                    | 365.12                                                              |                  |
| Temperature                       | 200(2) K                                                            |                  |
| Wavelength                        | 1.54178 Å                                                           |                  |
| Crystal system                    | Monoclinic                                                          |                  |
| Space group                       | P2 <sub>1</sub> /n                                                  |                  |
| Unit cell dimensions              | a = 10.5627(3) Å                                                    | α = 90°.         |
|                                   | b = 8.8564(3) Å                                                     | β = 98.7088(9)°. |
|                                   | c = 19.8868(7) Å                                                    | γ = 90°.         |
| Volume                            | 1838.91(10) Å <sup>3</sup>                                          |                  |
| Z                                 | 4                                                                   |                  |
| Density (calculated)              | 1.319 Mg/m <sup>3</sup>                                             |                  |
| Absorption coefficient            | 0.657 mm <sup>-1</sup>                                              |                  |
| F(000)                            | 764                                                                 |                  |
| Crystal size                      | 0.232 x 0.162 x 0.048 mm <sup>3</sup>                               |                  |
| Theta range for data collection   | 4.484 to 74.982°.                                                   |                  |
| Index ranges                      | -12 ≤ h ≤ 13, -11 ≤ k ≤ 11, -24 ≤ l ≤ 24                            |                  |
| Reflections collected             | 12050                                                               |                  |
| Independent reflections           | 3770 [R(int) = 0.0169]                                              |                  |
| Completeness to theta = 67.679°   | 99.7 %                                                              |                  |
| Absorption correction             | Semi-empirical from equivalents                                     |                  |
| Max. and min. transmission        | 0.7539 and 0.6813                                                   |                  |
| Refinement method                 | Full-matrix least-squares on F <sup>2</sup>                         |                  |
| Data / restraints / parameters    | 3770 / 0 / 275                                                      |                  |
| Goodness-of-fit on F <sup>2</sup> | 1.018                                                               |                  |
| Final R indices [I > 2σ(I)]       | R1 = 0.0365, wR2 = 0.0919                                           |                  |
| R indices (all data)              | R1 = 0.0399, wR2 = 0.0964                                           |                  |
| Extinction coefficient            | n/a                                                                 |                  |
| Largest diff. peak and hole       | 0.251 and -0.187 e.Å <sup>-3</sup>                                  |                  |

## Preparation of 1a and tryptanthrin

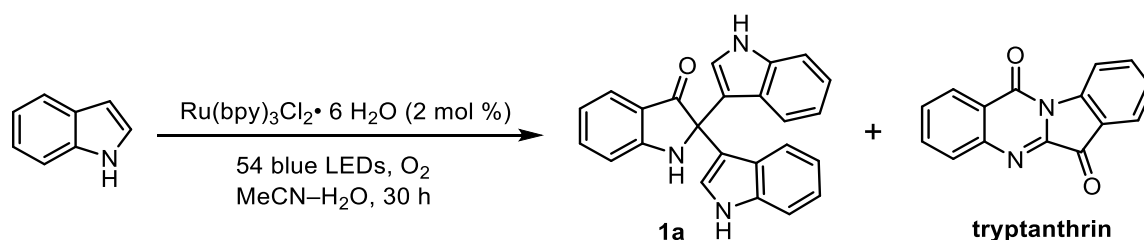

A magnetic stirring bar and indole (46.8 mg, 0.40 mmol) was placed in a 10-mL Schlenk tube vial, followed by sequential addition of  $\text{Ru(bpy)}_3\text{Cl}_2 \cdot 6\text{H}_2\text{O}$  (6.0 mg, 0.01 mmol, 0.02 equiv),  $\text{CH}_3\text{CN}$  (3.6 mL) and  $\text{H}_2\text{O}$  (0.4 mL). The Schlenk tube was equipped with a balloon of oxygen. With careful sealing, a single balloon of oxygen can last for the duration of the reaction without the need to refill the oxygen gas. The solution was stirred and irradiated with a strip of 54 blue LEDs, located 2–5 cm away from the reaction vial, for 30 h until the completion of the reaction, as monitored by TLC. Upon completion, the reaction solution was diluted with EtOAc and extracted with water and brine. The organic solution was dried over  $\text{MgSO}_4$ , and concentrated *in vacuo* to give a crude residue. The crude product was purified by flash column chromatography with 30% EtOAc–hexane to afford **1a** ( $R_f = 0.37$  in 40% EtOAc–hexane; 11.1 mg, 23% yield) as pale yellow solids and tryptanthrin ( $R_f = 0.65$  in 40% EtOAc–hexane; 13.4 mg, 27% yield) as pale yellow solids. Selected data for tryptanthrin:<sup>3</sup> m.p. 265–266 °C (decomp); lit 261–262 °C.<sup>4</sup> lit. 266–267 °C;<sup>5</sup> lit. 265–267 °C;<sup>6</sup>  $^1\text{H NMR}$  (500 MHz,  $\text{CDCl}_3$ ):  $\delta$  8.62 (d,  $J = 8.0$  Hz, 1 H), 8.43 (d,  $J = 8.0$ , 1 H), 8.02 (d,  $J = 8.0$ , 1.0 Hz, 1 H), 7.90 (d,  $J = 7.5$  Hz, 1 H), 7.84 (dd,  $J = 8.0$ , 8.0 Hz, 1 H), 7.77 (dd,  $J = 8.0$ , 7.5 Hz, 1 H), 7.66 (dd,  $J = 8.0$ , 8.0 Hz, 1 H), 7.41 (dd,  $J = 7.5$ , 7.5 Hz, 1 H);  $^{13}\text{C NMR}$  (125 MHz,  $\text{CDCl}_3$ ):  $\delta$  182.6 (C), 158.1 (C), 146.6 (C), 146.4 (C), 138.3 (CH), 135.1 (CH), 130.7 (CH), 130.3 (CH), 127.6 (CH), 127.2 (CH), 125.4 (CH), 123.8 (C), 121.9 (C), 118.0 (CH).

## Preparation of 5,5',5''-trifluoro-[3,2':2',3''-terindolin]-3'-one (**1b**), method 1.

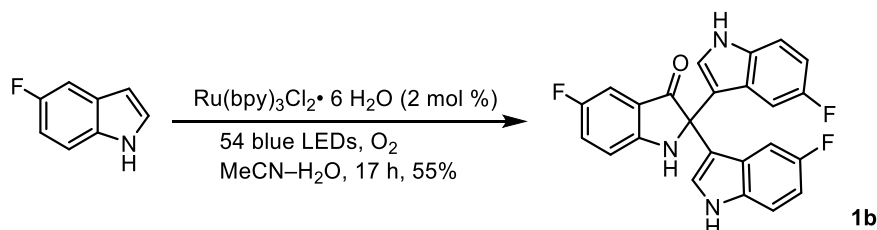

<sup>3</sup> (a) Liu, M.; Shu, M.; Yao, C.; Yin, G.; Wang, D.; Huang, J. *Org. Lett.* **2016**, *18*, 824–827. (b) Cai, Z. J.; Wang, S. Y.; Ji, S.-J. *Org. Lett.* **2013**, *15*, 5226–5229.

<sup>4</sup> Lygin, A. V.; De Meijere, A. *Org. Lett.* **2009**, *11*, 389–392.

<sup>5</sup> Jahng, K. C.; Kim, Seung I.; Kim, D. H.; Seo, C. S.; Son, J.-K.; Lee, S. H.; Lee, E. S.; Jahng, Y. *Chem. Pharm. Bull.* **2008**, *56*, 607–609.

<sup>6</sup> Al-Jalal, N.; Al-Awadi, N. A.; Ibrahim, M. R.; Elnagdi, M. H. *ARKIVOC*, **2011**, 288–297.

A magnetic stirring bar and 5-fluoro-1*H*-indole (54.0 mg, 0.40 mmol) was placed in a 10-mL Schlenk tube vial, followed by sequential addition of Ru(bpy)<sub>3</sub>Cl<sub>2</sub>·6H<sub>2</sub>O (6.3 mg, 0.01 mmol, 0.02 equiv), CH<sub>3</sub>CN (2.4 mL) and H<sub>2</sub>O (1.6 mL). The Schlenk tube was equipped with a balloon of oxygen. The solution was stirred and irradiated with a strip of 54 blue LEDs, located 2-5 cm away from the reaction vial, for 17 h until the completion of the reaction, as monitored by TLC. Upon completion, the reaction solution was diluted with EtOAc and extracted with water and brine. The organic solution was dried over MgSO<sub>4</sub>, and concentrated *in vacuo* to give a crude residue. The crude product was purified by flash column chromatography with 30% EtOAc–hexane to afford **1b** (*R<sub>f</sub>* = 0.58 in 50% EtOAc–hexane; 30.6 mg, 55% yield) as pale yellow solids. Selected data for **1b**:<sup>7</sup> m.p 154–155°C (decomp); IR (ATR)  $\nu_{\text{max}}$ : 3463, 3399, 3345, 1684, 1482, 1454, 1253, 1175, 801, 775 cm<sup>-1</sup>; <sup>1</sup>H NMR (500 MHz, CDCl<sub>3</sub>):  $\delta$  8.19 (brs, 2 H), 7.35 (dd, *J* = 7.0, 2.5 Hz, 1 H), 7.28 (ddd, *J* = 8.5, 8.5, 2.5 Hz, 1 H), 7.22 (dd, *J* = 8.5, 4.0 Hz, 2 H), 7.14 (d, *J* = 2.5 Hz, 2 H), 7.00 (dd, *J* = 10.0, 2.5 Hz, 2 H), 6.92 – 6.84 (m, 3 H), 5.25 (s, 1 H); <sup>13</sup>C NMR (125 MHz, CDCl<sub>3</sub>):  $\delta$  200.8 (d, *J* = 3.1 Hz, C), 157.7 (d, *J* = 234.8 Hz, two C), 157.0 (d, *J* = 240.3 Hz, C), 156.9 (C), 133.5 (two C), 125.9 (d, *J* = 25.4 Hz, CH), 125.8 (d, *J* = 10.0 Hz, two C), 125.5 (two CH), 120.4 (d, *J* = 7.2 Hz, C), 114.7 (d, *J* = 4.5 Hz, two C), 114.3 (d, *J* = 7.4 Hz, CH), 112.2 (d, *J* = 9.5 Hz, two CH), 110.9 (d, *J* = 26.6 Hz, two CH), 110.2 (d, *J* = 22.2, CH), 105.3 (d, *J* = 24.5 Hz, two CH), 69.0 (C); MS (*m/z*, relative intensity): 419 (M<sup>+</sup>+2, 0.5), 418 (M<sup>+</sup>+1, 7), 417 (M<sup>+</sup>, 28), 416 (5), 401 (7), 389 (27), 388 (100), 282 (4), 271 (4), 255 (9), 254 (13), 253 (7), 226 (8), 135 (9), 86 (9), 84 (16); exact mass calculated for C<sub>24</sub>H<sub>14</sub>F<sub>3</sub>N<sub>3</sub>O(M<sup>+</sup>): 417.1089; found: 417.1085.

### Preparation of 5,5',5''-trifluoro-[3,2':2',3''-terindolin]-3'-one (**1b**), method 2.

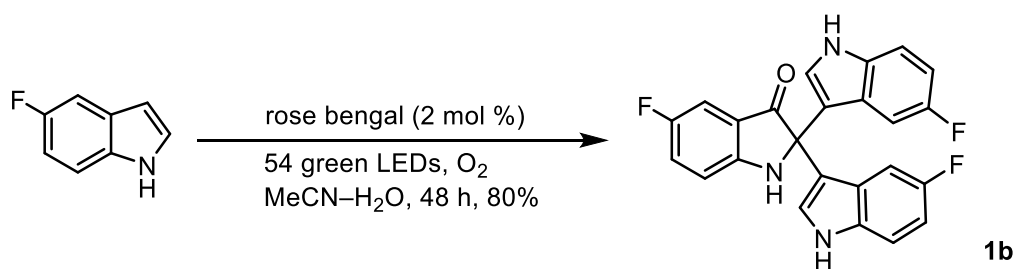

A magnetic stirring bar and 5-fluoro-1*H*-indole (54.0 mg, 0.40 mmol) was placed in a 10-mL Schlenk tube vial, followed by sequential addition of rose bengal (7.8 mg, 0.01 mmol, 0.02 equiv), CH<sub>3</sub>CN (2.4 mL) and H<sub>2</sub>O (1.6 mL). The Schlenk tube was equipped with a balloon of oxygen. The solution was stirred and irradiated with a strip of 54 green LEDs, located 2-5 cm away from the reaction vial, for 17 h until the completion of the reaction, as monitored by TLC. Upon completion, the reaction solution was diluted with EtOAc and extracted with water and brine. The organic solution was dried over MgSO<sub>4</sub>, and concentrated *in vacuo* to give a crude residue. The crude product was

<sup>7</sup> Qin, W.-B.; Chang, Q.; Bao, Y.-H.; Wang, N.; Chen, Z.-W.; Liu, L.-X. *Org. Biomol. Chem.* **2012**, *10*, 8814 – 8821.

purified by flash column chromatography with 30% EtOAc–hexane to afford **1b** ( $R_f = 0.58$  in 50% EtOAc–hexane; 44.5 mg, 80% yield) as pale yellow solids.

### Preparation of 6,6',6''-trifluoro-[3,2':2',3''-terindolin]-3'-one (**1c**), method 1.

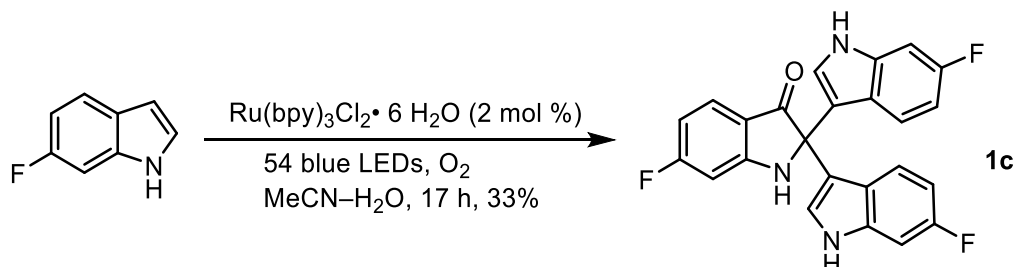

A magnetic stirring bar and 6-fluoro-1H-indole (58.3 mg, 0.43 mmol) was placed in a 10-mL Schlenk tube vial, followed by sequential addition of  $\text{Ru}(\text{bpy})_3\text{Cl}_2 \cdot 6\text{H}_2\text{O}$  (6.5 mg, 0.01 mmol, 0.02 equiv),  $\text{CH}_3\text{CN}$  (2.0 mL) and  $\text{H}_2\text{O}$  (1.3 mL). The Schlenk tube was equipped with a balloon of oxygen. The solution was stirred and irradiated with a strip of 54 blue LEDs, located 2–5 cm away from the reaction vial, for 17 h until the completion of the reaction, as monitored by TLC. Upon completion, the reaction solution was diluted with EtOAc and extracted with water and brine. The organic solution was dried over  $\text{MgSO}_4$ , and concentrated *in vacuo* to give a crude residue. The crude product was purified by flash column chromatography with 30% EtOAc–hexane to afford **1c** ( $R_f = 0.32$  in 40% EtOAc–hexane; 19.8 mg, 33% yield) as pale yellow solids. Selected data for **1c**:<sup>8</sup> m.p. 180–181°C (decomp); IR (ATR)  $\nu_{\text{max}}$ : 3402, 3334, 1684, 1622, 1591, 1453, 1297, 1142, 1090, 951, 835, 801  $\text{cm}^{-1}$ ;  $^1\text{H}$  NMR (500 MHz,  $\text{DMSO-d}_6$ ):  $\delta$  11.09 (brs, 2 H), 8.51 (s, 1 H), 7.55 (dd,  $J = 8.5, 6.0$  Hz, 1 H), 7.24 (dd,  $J = 8.5, 6.0$  Hz, 2 H), 7.14 (dd,  $J = 10.0, 2.5$  Hz, 2 H), 7.12 (d,  $J = 2.5$  Hz, 2 H), 6.76–6.71 (m, 2 H), 6.64 (dd,  $J = 10.5, 2.5$  Hz, 1 H), 6.57–6.51 (m, 1 H);  $^{13}\text{C}$  NMR (125 MHz,  $\text{DMSO-d}_6$ ):  $\delta$  198.6 (C), 168.9 (d,  $J = 251.4$  Hz, C), 161.8 (d,  $J = 14.8$  Hz, C), 158.7 (d,  $J = 234.3$  Hz, two C), 136.8 (d,  $J = 12.4$  Hz, two C), 127.4 (d,  $J = 12.7$  Hz, CH), 124.6 (d,  $J = 2.9$  Hz, two CH), 122.2 (two C), 121.3 (d,  $J = 10.0$  Hz, two CH), 114.4 (C), 113.8 (two C), 107.1 (d,  $J = 24.2$  Hz, two CH), 105.7 (d,  $J = 25.0$  Hz, CH), 97.5 (d,  $J = 25.7$  Hz, two CH), 97.3 (d,  $J = 26.1$  Hz, CH), 68.0 (C); MS ( $m/z$ , relative intensity): 419 ( $\text{M}^{+2}$ , 1), 418 ( $\text{M}^{+1}$ , 5), 417 ( $\text{M}^+$ , 20), 389 (19), 388 (72), 254 (14), 226 (14), 223 (13), 181 (14), 167 (17), 165 (60), 149 (100), 147 (21), 137 (19), 135 (14), 121 (23), 105 (99), 91 (29), 84 (34), 77 (70); exact mass calculated for  $\text{C}_{24}\text{H}_{14}\text{F}_3\text{N}_3\text{O}$  ( $\text{M}^+$ ): 417.1089; found: 417.1092.

<sup>8</sup> Qin, W.-B.; Chang, Q.; Bao, Y.-H.; Wang, N.; Chen, Z.-W.; Liu, L.-X. *Org. Biomol. Chem.* **2012**, *10*, 8814–8821.

### Preparation of 6,6',6''-trifluoro-[3,2':2',3''-terindolin]-3'-one (**1c**), method 2.

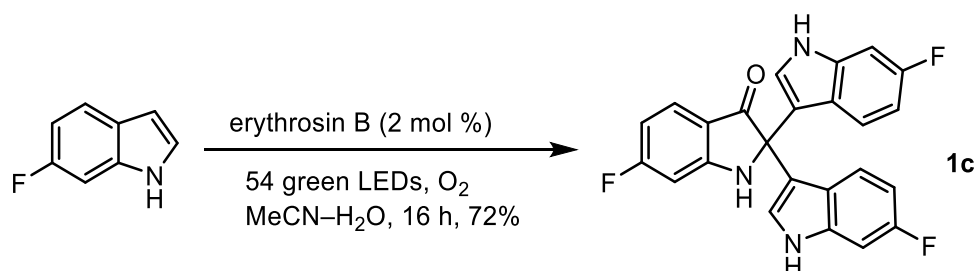

A magnetic stirring bar and 6-fluoro-1*H*-indole (58.3 mg, 0.43 mmol) was placed in a 10-mL Schlenk tube vial, followed by sequential addition of erythrosine B (7.8 mg, 0.01 mmol, 0.02 equiv), CH<sub>3</sub>CN (2.4 mL) and H<sub>2</sub>O (1.6 mL). The Schlenk tube was equipped with a balloon of oxygen. The solution was stirred and irradiated with a strip of 54 green LEDs, located 2-5 cm away from the reaction vial, for 17 h until the completion of the reaction, as monitored by TLC. Upon completion, the reaction solution was diluted with EtOAc and extracted with water and brine. The organic solution was dried over MgSO<sub>4</sub>, and concentrated *in vacuo* to give a crude residue. The crude product was purified by flash column chromatography with 30% EtOAc–hexane to afford **1c** (*R<sub>f</sub>* = 0.32 in 40% EtOAc–hexane; 40.1 mg, 72% yield) as pale yellow solids.

### Preparation of 5,5',5''-trichloro-[3,2':2',3''-terindolin]-3'-one (**1d**)

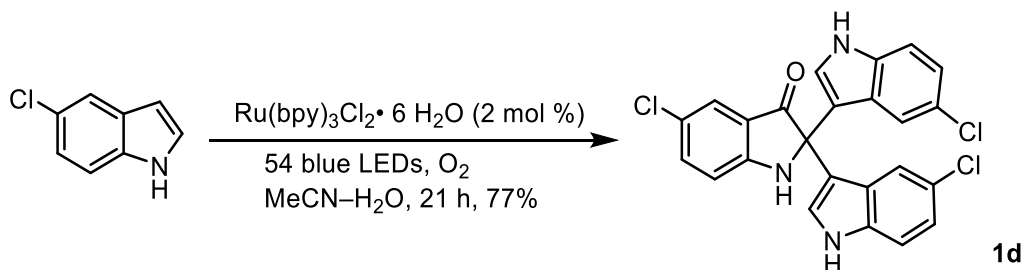

A magnetic stirring bar and 5-chloro-1*H*-indole (61.5 mg, 0.406 mmol) was placed in a 10-mL Schlenk tube vial, followed by sequential addition of Ru(bpy)<sub>3</sub>Cl<sub>2</sub>·6H<sub>2</sub>O (7.4 mg, 0.01 mmol, 0.02 equiv), CH<sub>3</sub>CN (2.0 mL) and H<sub>2</sub>O (1.3 mL). The Schlenk tube was equipped with a balloon of oxygen. The solution was stirred and irradiated with a strip of 54 blue LEDs, located 2-5 cm away from the reaction vial, for 21 h until the completion of the reaction, as monitored by TLC. Upon completion, the reaction solution was diluted with EtOAc and extracted with water and brine. The organic solution was dried over MgSO<sub>4</sub>, and concentrated *in vacuo* to give a crude residue. The crude product was purified by flash column chromatography with 30% EtOAc–hexane to afford **1d** (*R<sub>f</sub>* = 0.30 in 40% EtOAc–hexane; 48.6 mg, 77% yield) as pale yellow solids. Selected data for **1d**:<sup>9</sup> m.p. 214–216 °C (decomp); IR (ATR)  $\nu_{\text{max}}$ : 3407, 3337, 1689, 1614, 1464, 1254, 1170, 1103, 894, 799, 685 cm<sup>-1</sup>; <sup>1</sup>H NMR (500 MHz, DMSO-*d*<sub>6</sub>):  $\delta$  11.29 (brs, 1 H), 11.28 (brs, 1 H), 8.51 (s, 1 H), 7.55 (dd, *J* = 8.6, 2.3

<sup>9</sup> Liao, H.; Peng, X.; Hu, D.; Xu, X.; Huang, P.; Liu, Q.; Liu, L. *Org. Biomol. Chem.* **2018**, *16*, 5699 – 5706.



Hz, 1 H), 7.50 (d,  $J = 2.3$  Hz, 1 H), 7.40 (d,  $J = 8.6$  Hz, 2 H), 7.25 – 7.21 (m, 4 H), 7.05 (dd,  $J = 8.6$ , 2.3 Hz, 2 H), 7.00 (d,  $J = 8.6$  Hz, 1 H);  $^{13}\text{C}$  NMR (125 MHz, DMSO- $d_6$ ):  $\delta$  199.3 (C), 159.0 (C), 137.6 (CH), 135.5 (two C), 126.5 (two C), 125.6 (two CH), 123.6 (CH), 123.2 (two C), 121.3 (two CH), 121.2 (C), 119.3 (two CH), 118.3 (C), 113.7 (CH), 113.5 (two CH), 113.0 (two C), 67.9 (C);<sup>10</sup> MS ( $m/z$ , relative intensity): 468 ( $M^++3$ , 10), 467 ( $M^++2$ , 32), 466 ( $M^++1$ , 14), 465 ( $M^+$ , 34), 451 (14), 441 (9), 440 (34), 439 (29), 438 (98), 437 (31), 436 (100), 402 (11), 401 (11), 400 (11), 365 (9), 316 (13), 314 (12), 288 (18), 287 (20), 286 (23), 252 (11), 251 (10), 216 (10), 176 (10), 151 (33), 89 (11); exact mass calculated for  $\text{C}_{24}\text{H}_{14}^{35}\text{Cl}_3\text{N}_3\text{O}$  ( $M^+$ ): 465.0202; found: 465.0212.

### Preparation of 6,6',6''-trichloro-[3,2':2',3''-terindolin]-3'-one (1e)

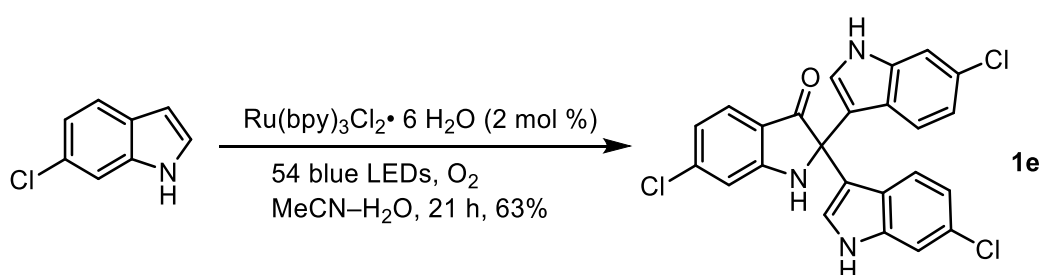

A magnetic stirring bar and 6-chloro-1H-indole (61.7 mg, 0.407 mmol) was placed in a 10-mL Schlenk tube vial, followed by sequential addition of  $\text{Ru}(\text{bpy})_3\text{Cl}_2 \cdot 6\text{H}_2\text{O}$  (6.8 mg, 0.01 mmol, 0.02 equiv),  $\text{CH}_3\text{CN}$  (2.0 mL) and  $\text{H}_2\text{O}$  (1.3 mL). The Schlenk tube was equipped with a balloon of oxygen. The solution was stirred and irradiated with a strip of 54 blue LEDs, located 2–5 cm away from the reaction vial, for 21 h until the completion of the reaction, as monitored by TLC. Upon completion, the reaction solution was diluted with EtOAc and extracted with water and brine. The organic solution was dried over  $\text{MgSO}_4$ , and concentrated *in vacuo* to give a crude residue. The crude product was purified by flash column chromatography with 30% EtOAc–hexane to afford **1e** ( $R_f = 0.32$  in 40% EtOAc–hexane; 39.9 mg, 63% yield) as pale yellow solids. Selected data for **1e**:<sup>11</sup> m.p. 219–220 °C (decomp); IR (ATR)  $\nu_{\text{max}}$ : 3458, 3329, 3267, 1665, 1601, 1451, 1291, 1064, 848, 809, 799  $\text{cm}^{-1}$ ;  $^1\text{H}$  NMR (500 MHz, DMSO- $d_6$ ):  $\delta$  11.18 (brs, 2 H), 8.47 (s, 1 H), 7.49 (d,  $J = 8.2$  Hz, 1 H), 7.41 (d,  $J = 2.0$  Hz, 2 H), 7.21 (d,  $J = 8.6$  Hz, 2 H), 7.17 (d,  $J = 2.0$  Hz, 2 H), 6.95 (d,  $J = 2.0$  Hz, 1 H), 6.89 (dd,  $J = 8.6$ , 2.0 Hz, 2 H), 6.75 (dd,  $J = 8.2$ , 2.0 Hz, 1 H);  $^{13}\text{C}$  NMR (125 MHz, DMSO- $d_6$ ):  $\delta$  199.0 (C), 160.6 (C), 142.4 (C), 137.3 (C), 126.4 (CH), 126.0 (two C), 125.1 (two CH), 124.2 (two C), 121.5 (two CH), 119.0 (two CH and C), 117.7 (CH), 116.3 (C), 113.6 (two C), 111.3 (two CH), 111.0 (CH), 67.7 (C);<sup>12</sup> MS ( $m/z$ , relative intensity): 469 ( $M^++4$ , 11), 468 ( $M^++3$ , 10), 467 ( $M^++2$ , 31), 466 ( $M^++1$ ,

<sup>10</sup> Gohain, S. B.; Basumatary, M.; Boruah, P. K.; Das, M. R.; Thakur, A. J. *Green Chem.* **2020**, *22*, 170 – 179.

<sup>11</sup> (a) Kothandapani, J.; Reddy, S. M. K.; Thamocharan, S.; Kumar, S. M.; Byrappa, K.; Ganesan, S. S. *Eur. J. Org. Chem.* **2018**, 2762 – 2767. (b) Kong, Y.-B.; Zhu, J.-Y.; Chen, Z.-W.; Liu, L.-X. *Can. J. Chem.* **2014**, *92*, 269 – 273. (c) Xue, J.; Bao, Y.; Qin, W.; Zhu, J.; Kong, Y.; Qu, H.; Chen, Z.; Liu, L. *Synth. Commun.* **2014**, *44*, 2215 – 2221.

<sup>12</sup> Kothandapani, J.; Reddy, S. M. K.; Thamocharan, S.; Kumar, S. M.; Byrappa, K.; Ganesan, S. S. *Eur. J. Org. Chem.*

13), 465 ( $M^+$ , 32), 440 (33), 439 (28), 438 (98), 437 (30), 436 (100), 402 (12), 401 (12), 400 (14), 365 (9), 286 (12), 149 (39), 105 (18), 77 (7); exact mass calculated for  $C_{24}H_{14}^{35}Cl_3N_3O$  ( $M^+$ ): 465.0202; found: 465.0194.

### Preparation of 6,6',6''-tribromo-[3,2':2',3''-terindolin]-3'-one (**1f**)

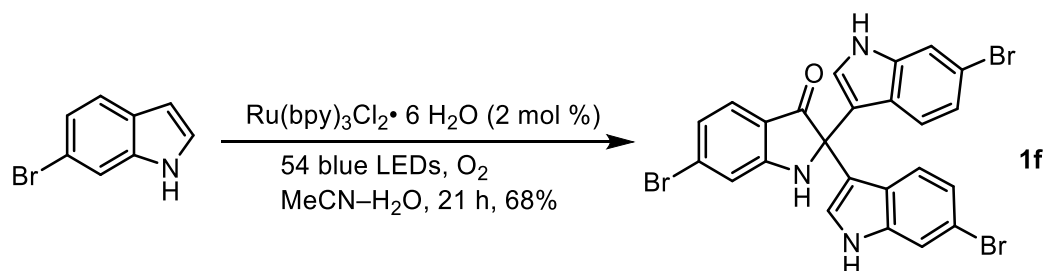

A magnetic stirring bar and 6-bromo-1H-indole (82.7 mg, 0.422 mmol) was placed in a 10-mL Schlenk tube vial, followed by sequential addition of  $Ru(bpy)_3Cl_2 \cdot 6H_2O$  (6.8 mg, 0.01 mmol, 0.02 equiv),  $CH_3CN$  (2.0 mL) and  $H_2O$  (1.3 mL). The Schlenk tube was equipped with a balloon of oxygen. The solution was stirred and irradiated with a strip of 54 blue LEDs, located 2-5 cm away from the reaction vial, for 21 h until the completion of the reaction, as monitored by TLC. Upon completion, the reaction solution was diluted with EtOAc and extracted with water and brine. The organic solution was dried over  $MgSO_4$ , and concentrated *in vacuo* to give a crude residue. The crude product was purified by flash column chromatography with 30% EtOAc–hexane to afford **1f** ( $R_f = 0.29$  in 40% EtOAc–hexane; 57.3 mg, 68% yield) as pale yellow solids. Selected data for **1f**: m.p 212–213 °C (decomp); IR (ATR)  $\nu_{max}$ : 3445, 3319, 3278, 2924, 1663, 1596, 1451, 1291, 1101, 1054, 915, 850, 796  $cm^{-1}$ ;  $^1H$  NMR (500 MHz, DMSO- $d_6$ ):  $\delta$  11.19 (brs, 2 H), 8.44 (s, 1 H), 7.56 (d,  $J = 1.5$  Hz, 2 H), 7.42 (d,  $J = 8.0$  Hz, 1 H), 7.18–7.14 (m, 4 H), 7.12 (d,  $J = 1.5$  Hz, 1 H), 7.00 (dd,  $J = 8.5, 1.5$  Hz, 2 H), 6.88 (dd,  $J = 8.5, 1.5$  Hz, 1 H);  $^{13}C$  NMR (125 MHz, DMSO- $d_6$ ):  $\delta$  199.2 (C), 160.7 (C), 137.8 (two C), 131.8 (C), 126.4 (CH), 125.0 (two CH), 124.4 (two C), 121.9 (two CH), 121.5 (two CH), 120.4 (CH), 116.5 (C), 114.3 (two CH), 114.1 (CH), 114.0 (two C), 113.6 (two C), 67.6 (C); MS ( $m/z$ , relative intensity): 603 ( $M^+ + 6$ , 13), 602 ( $M^+ + 5$ , 11), 601 ( $M^+ + 4$ , 36), 600 ( $M^+ + 3$ , 14), 599 ( $M^+ + 2$ , 36), 598 ( $M^+ + 1$ , 8), 597 ( $M^+$ , 15), 575 (10), 574 (36), 573 (29), 572 (100), 571 (30), 570 (100), 569 (11), 568 (35), 493 (11), 492 (17), 491 (21), 490 (22), 489 (11), 488 (10), 411 (10), 404 (13), 377 (9), 376 (11), 330 (10), 296 (9), 216 (20), 197 (16), 195 (16), 116 (13); exact mass calculated for  $C_{24}H_{14}^{79}Br_3N_3O$  ( $M^+$ ): 596.8687; found: 596.8690.

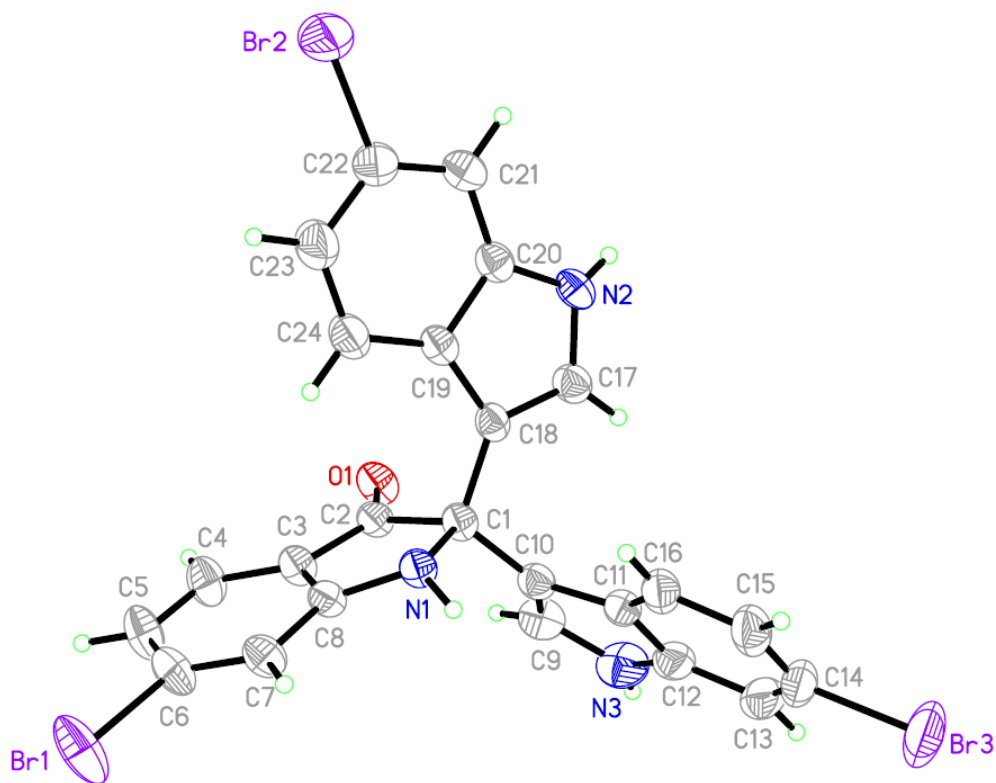

Thermal ellipsoids draw at the 50% probability level

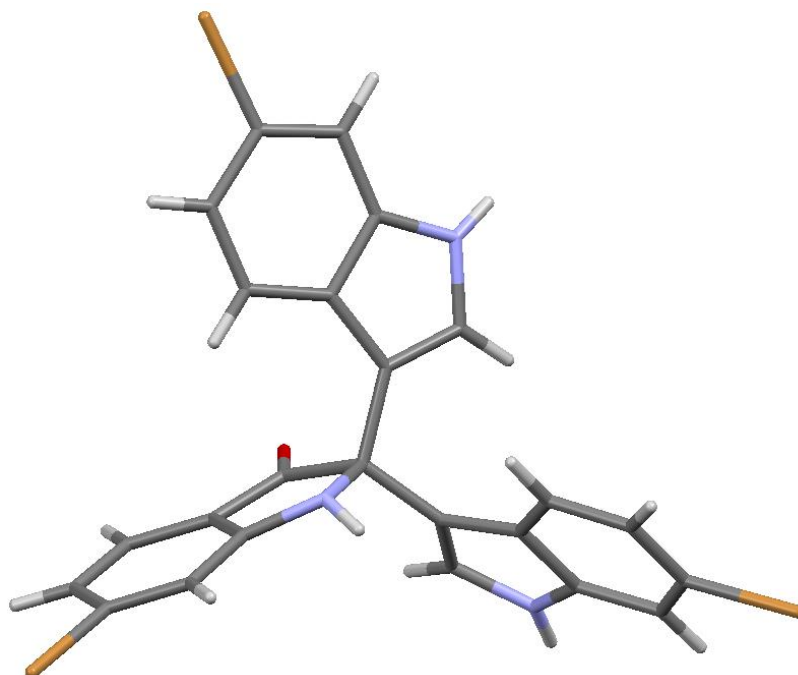

**Figure S3.** ORTEP and Stereo plots for X-ray crystal structures of **1f (ic19379)**.

CCDC 2005724 contains the supplementary crystallographic data for **1f (ic19379)**. These data can be obtained free of charge from the Cambridge Crystallographic Data Centre via [www.ccdc.cam.ac.uk](http://www.ccdc.cam.ac.uk)

Table S2. Crystal data and structure refinement for **1f (ic19379)**.

|                                   |                                                                                           |                   |
|-----------------------------------|-------------------------------------------------------------------------------------------|-------------------|
| Identification code               | ic19379                                                                                   |                   |
| Empirical formula                 | C <sub>24.25</sub> H <sub>14.50</sub> Br <sub>3</sub> Cl <sub>0.50</sub> N <sub>3</sub> O |                   |
| Formula weight                    | 621.34                                                                                    |                   |
| Temperature                       | 200(2) K                                                                                  |                   |
| Wavelength                        | 1.54178 Å                                                                                 |                   |
| Crystal system                    | Monoclinic                                                                                |                   |
| Space group                       | C2/c                                                                                      |                   |
| Unit cell dimensions              | a = 26.7209(6) Å                                                                          | α = 90°.          |
|                                   | b = 15.6427(3) Å                                                                          | β = 104.3612(4)°. |
|                                   | c = 11.8698(3) Å                                                                          | γ = 90°.          |
| Volume                            | 4806.38(19) Å <sup>3</sup>                                                                |                   |
| Z                                 | 8                                                                                         |                   |
| Density (calculated)              | 1.717 Mg/m <sup>3</sup>                                                                   |                   |
| Absorption coefficient            | 6.913 mm <sup>-1</sup>                                                                    |                   |
| F(000)                            | 2420                                                                                      |                   |
| Crystal size                      | 0.170 x 0.109 x 0.075 mm <sup>3</sup>                                                     |                   |
| Theta range for data collection   | 3.301 to 74.999°.                                                                         |                   |
| Index ranges                      | -33<=h<=33, -18<=k<=19, -14<=l<=14                                                        |                   |
| Reflections collected             | 17387                                                                                     |                   |
| Independent reflections           | 4951 [R(int) = 0.0191]                                                                    |                   |
| Completeness to theta = 67.679°   | 99.7 %                                                                                    |                   |
| Absorption correction             | Semi-empirical from equivalents                                                           |                   |
| Max. and min. transmission        | 0.7539 and 0.5857                                                                         |                   |
| Refinement method                 | Full-matrix least-squares on F <sup>2</sup>                                               |                   |
| Data / restraints / parameters    | 4951 / 5 / 304                                                                            |                   |
| Goodness-of-fit on F <sup>2</sup> | 1.050                                                                                     |                   |
| Final R indices [I>2sigma(I)]     | R1 = 0.0628, wR2 = 0.1673                                                                 |                   |
| R indices (all data)              | R1 = 0.0655, wR2 = 0.1701                                                                 |                   |
| Extinction coefficient            | n/a                                                                                       |                   |
| Largest diff. peak and hole       | 2.114 and -2.347 e.Å <sup>-3</sup>                                                        |                   |

**Preparation of 7,7',7''-tribromo-[3,2':2',3''-terindolin]-3'-one (1g), method 1.**

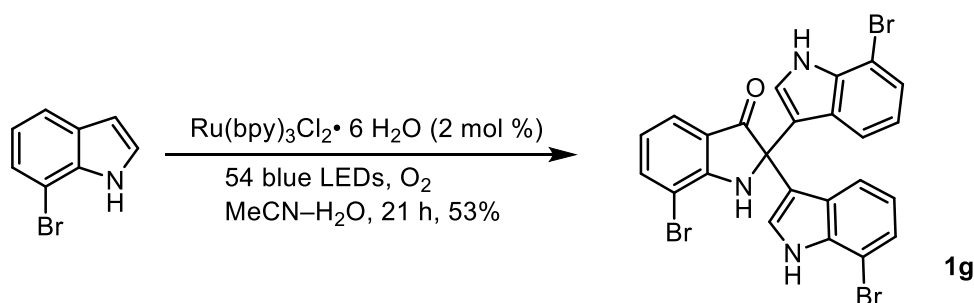

A magnetic stirring bar and 7-bromo-1H-indole (84.2 mg, 0.429 mmol) was placed in a 10-mL Schlenk tube vial, followed by sequential addition of  $\text{Ru}(\text{bpy})_3\text{Cl}_2 \cdot 6\text{H}_2\text{O}$  (6.8 mg, 0.01 mmol, 0.02 equiv),  $\text{CH}_3\text{CN}$  (2.0 mL) and  $\text{H}_2\text{O}$  (1.3 mL). The Schlenk tube was equipped with a balloon of oxygen. The solution was stirred and irradiated with a strip of 54 blue LEDs, located 2-5 cm away from the reaction vial, for 21 h until the completion of the reaction, as monitored by TLC. Upon completion, the reaction solution was diluted with EtOAc and extracted with water and brine. The organic solution was dried over  $\text{MgSO}_4$ , and concentrated *in vacuo* to give a crude residue. The crude product was purified by flash column chromatography with 20% EtOAc–hexane to afford **1g** ( $R_f = 0.59$  in 40% EtOAc–hexane; 45.5 mg, 53% yield) as pale yellow solids. Selected data for **1g**: m.p 247–249 °C (decomp); IR (ATR)  $\nu_{\text{max}}$ : 3409, 3378, 1699, 1606, 1482, 1431, 1116, 1090, 881, 816, 778, 742, 729  $\text{cm}^{-1}$ ;  $^1\text{H}$  NMR (500 MHz,  $\text{CDCl}_3$ ):  $\delta$  8.29 (brs, 2 H), 7.70 (d,  $J = 7.5$ , 1 H), 7.66 (d,  $J = 7.5$  Hz, 1 H), 7.32 (dd,  $J = 7.5$ , 7.5 Hz, 4 H), 7.25 – 7.23 (m, 2 H), 6.87 (dd,  $J = 7.5$ , 7.5 Hz, 2 H), 6.81 (dd,  $J = 7.5$ , 7.5 Hz, 1 H), 5.51 (s, 1 H);  $^{13}\text{C}$  NMR (125 MHz,  $\text{CDCl}_3$ ):  $\delta$  199.7 (C), 157.5 (C), 139.6 (CH), 135.7 (two C), 126.6 (two C), 124.9 (two CH), 124.6 (CH), 124.4 (two CH), 121.4 (two CH), 121.1 (C), 120.6 (CH), 119.8 (two CH), 115.8 (two C), 106.4 (C), 105.0 (two C), 68.6 (C); MS ( $m/z$ , relative intensity): 603 ( $\text{M}^+ + 6$ , 10), 602 ( $\text{M}^+ + 5$ , 8), 601 ( $\text{M}^+ + 4$ , 28), 600 ( $\text{M}^+ + 3$ , 10), 599 ( $\text{M}^+ + 2$ , 29), 598 ( $\text{M}^+ + 1$ , 6), 597 ( $\text{M}^+$ , 10), 574 (32), 573 (25), 572 (98), 571 (26), 570 (100), 568 (32), 492 (12), 491 (15), 490 (16), 330 (8), 206 (9), 165 (10); exact mass calculated for  $\text{C}_{24}\text{H}_{14}^{79}\text{Br}_3\text{N}_3\text{O}$  ( $\text{M}^+$ ): 596.8687; found: 596.8683.

**Preparation of 7,7',7''-tribromo-[3,2':2',3''-terindolin]-3'-one (1g), method 2.**

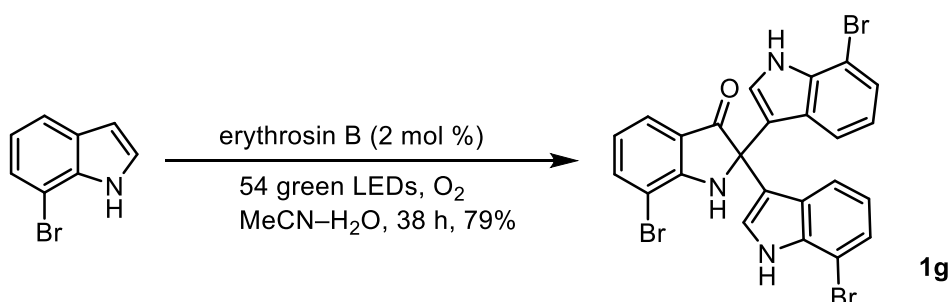

A magnetic stirring bar and 7-bromo-1H-indole (78.4 mg, 0.40 mmol) was placed in a 10-mL Schlenk

tube vial, followed by sequential addition of erythrosine B (7.8 mg, 0.01 mmol, 0.02 equiv), CH<sub>3</sub>CN (2.4 mL) and H<sub>2</sub>O (1.6 mL). The Schlenk tube was equipped with a balloon of oxygen. The solution was stirred and irradiated with a strip of 54 green LEDs, located 2-5 cm away from the reaction vial, for 21 h until the completion of the reaction, as monitored by TLC. Upon completion, the reaction solution was diluted with EtOAc and extracted with water and brine. The organic solution was dried over MgSO<sub>4</sub>, and concentrated *in vacuo* to give a crude residue. The crude product was purified by flash column chromatography with 20% EtOAc–hexane to afford **1g** ( $R_f$  = 0.59 in 40% EtOAc–hexane; 63.2 mg, 79% yield) as pale yellow solids.

### Preparation of 5,5',5''-triiodo-[3,2':2',3''-terindolin]-3'-one (**1h**)

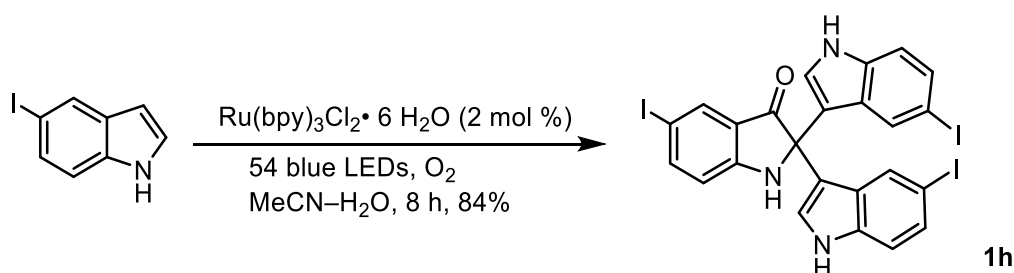

A magnetic stirring bar and 5-iodo-1*H*-indole (98.8 mg, 0.406 mmol) was placed in a 10-mL Schlenk tube vial, followed by sequential addition of Ru(bpy)<sub>3</sub>Cl<sub>2</sub>·6H<sub>2</sub>O (6.1 mg, 0.01 mmol, 0.02 equiv), CH<sub>3</sub>CN (2.0 mL) and H<sub>2</sub>O (1.3 mL). The Schlenk tube was equipped with a balloon of oxygen. The solution was stirred and irradiated with a strip of 54 blue LEDs, located 2-5 cm away from the reaction vial, for 8 h until the completion of the reaction, as monitored by TLC. Upon completion, the reaction solution was diluted with EtOAc and extracted with water and brine. The organic solution was dried over MgSO<sub>4</sub>, and concentrated *in vacuo* to give a crude residue. The crude product was purified by flash column chromatography with 30% EtOAc–hexane to afford **1h** ( $R_f$  = 0.30 in 40% EtOAc–hexane; 84.4 mg, 84% yield) as pale yellow solids. Selected data for **1h**: m.p. 249–250 °C (decomp); IR (ATR)  $\nu_{\text{max}}$ : 3456, 3409, 3386, 1699, 1601, 1464, 1098, 799 cm<sup>-1</sup>; <sup>1</sup>H NMR (500 MHz, DMSO-*d*<sub>6</sub>):  $\delta$  11.25 (brs, 2 H), 8.50 (s, 1 H), 7.77 (d,  $J$  = 1.5 Hz, 1 H), 7.75 (s, 1 H), 7.59 (d,  $J$  = 1.5 Hz, 2 H), 7.30 (dd,  $J$  = 8.5, 1.5 Hz, 2 H), 7.24 (d,  $J$  = 8.5 Hz, 2 H), 7.13 (d,  $J$  = 2.5 Hz, 2 H), 6.84 (d,  $J$  = 8.5 Hz, 1 H); <sup>13</sup>C NMR (125 MHz, DMSO-*d*<sub>6</sub>):  $\delta$  198.7 (C), 159.4 (C), 145.3 (CH), 136.0 (two C), 132.7 (CH), 129.2 (two CH), 128.6 (two CH), 128.0 (two C), 125.0 (two CH), 119.9 (C), 114.5 (CH), 114.3 (two CH), 112.6 (two C), 82.8 (two C), 78.3 (C), 67.5 (C); MS ( $m/z$ , relative intensity): 743 ( $M^{+2}$ , 2), 742 ( $M^{+1}$ , 18), 741 ( $M^+$ , 65), 725 (13), 713 (36), 712 (100), 586 (19), 585 (27), 498 (66), 470 (15), 343 (57), 330 (21), 243 (85), 216 (23), 141 (18), 128 (34), 116 (55), 89 (24), 75 (20); exact mass calculated for C<sub>24</sub>H<sub>14</sub>I<sub>3</sub>N<sub>3</sub>O ( $M^+$ ): 740.8271; found: 740.8279.

### Preparation of 3'-oxo-[3,2':2',3''-terindoline]-5,5',5''-tricarbonitrile (**1i**)

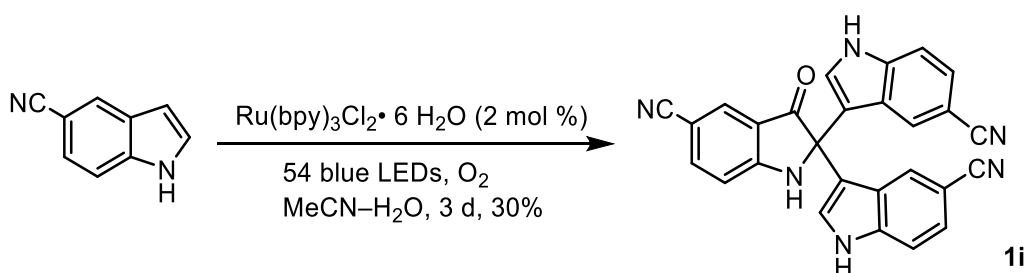

A magnetic stirring bar and 1*H*-indole-5-carbonitrile (60.7 mg, 0.43 mmol) was placed in a 10-mL Schlenk tube vial, followed by sequential addition of  $\text{Ru}(\text{bpy})_3\text{Cl}_2 \cdot 6 \text{H}_2\text{O}$  (7.0 mg, 0.01 mmol, 0.02 equiv),  $\text{CH}_3\text{CN}$  (2.0 mL) and  $\text{H}_2\text{O}$  (1.3 mL). The Schlenk tube was equipped with a balloon of oxygen. The solution was stirred and irradiated with a strip of 54 blue LEDs, located 2-5 cm away from the reaction vial, for 72 h until the completion of the reaction, as monitored by TLC. Upon completion, the reaction solution was diluted with EtOAc and extracted with water and brine. The organic solution was dried over  $\text{MgSO}_4$ , and concentrated *in vacuo* to give a crude residue. The crude product was purified by flash column chromatography with 30% acetone–hexane to afford **1i** ( $R_f = 0.31$  in 50% acetone–hexane; 18.7 mg, 30% yield) as pale yellow solids. Selected data for **1i**:<sup>13</sup> m.p. 175–177 °C (decomp); IR (ATR)  $\nu_{\text{max}}$ : 3309, 2223, 1709, 1619, 1487  $\text{cm}^{-1}$ ;  $^1\text{H}$  NMR (500 MHz,  $\text{DMSO-d}_6$ ):  $\delta$  11.76 (brs, 2 H), 9.41 (s, 1 H), 8.03 (d,  $J = 1.5$  Hz, 1 H), 7.87 (dd,  $J = 8.5, 1.5$  Hz, 1 H), 7.63 (s, 2 H), 7.57 (d,  $J = 8.5$  Hz, 2 H), 7.47 (d,  $J = 1.5$  Hz, 2 H), 7.42 (dd,  $J = 8.5, 1.5$  Hz, 2 H), 7.08 (d,  $J = 8.5$  Hz, 1 H);  $^{13}\text{C}$  NMR (125 MHz,  $\text{DMSO-d}_6$ ):  $\delta$  198.0 (C), 161.2 (C), 140.6 (CH), 138.8 (two C), 130.8 (CH), 126.6 (two CH), 125.3 (two CH), 124.9 (two C), 124.1 (two CH), 120.5 (two C), 119.3 (C), 117.0 (C), 113.5 (two C), 113.4 (two CH), 112.6 (CH), 101.0 (two C), 99.0 (C), 67.5 (C); MS ( $m/z$ , relative intensity): 439 ( $\text{M}^+ + 1$ , 2), 438 ( $\text{M}^+$ , 10), 410 (20), 409 (63), 298 (29), 296 (16), 269 (31), 268 (46), 240 (15), 167 (21), 142 (100), 115 (58), 114 (31), 105 (18), 91 (22), 77 (27); exact mass calculated for  $\text{C}_{27}\text{H}_{14}\text{N}_6\text{O}$  ( $\text{M}^+$ ): 438.1229; found: 438.1227.

### Preparation of 5,5',5''-trimethyl-[3,2':2',3''-terindolin]-3'-one (**1j**), method 1.

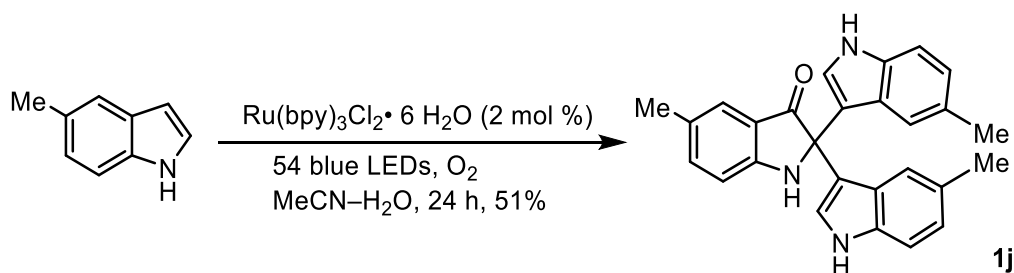

<sup>13</sup> (a) Kong, Y.-B.; Zhu, J.-Y.; Chen, Z.-W.; Liu, L.-X. *Can. J. Chem.* **2014**, *92*, 269 – 273. (b) Xue, J.; Bao, Y.; Qin, W.; Zhu, J.; Kong, Y.; Qu, H.; Chen, Z.; Liu, L. *Synth. Commun.* **2014**, *44*, 2215 – 2221.

A magnetic stirring bar and 1*H*-indole-5-carbonitrile (52.5 mg, 0.40 mmol) was placed in a 10-mL Schlenk tube vial, followed by sequential addition of Ru(bpy)<sub>3</sub>Cl<sub>2</sub>•6H<sub>2</sub>O (6.8 mg, 0.01 mmol, 0.02 equiv), CH<sub>3</sub>CN (2.4 mL) and H<sub>2</sub>O (1.6 mL). The Schlenk tube was equipped with a balloon of oxygen. The solution was stirred and irradiated with a strip of 54 blue LEDs, located 2-5 cm away from the reaction vial, for 24 h until the completion of the reaction, as monitored by TLC. Upon completion, the reaction solution was diluted with EtOAc and extracted with water and brine. The organic solution was dried over MgSO<sub>4</sub>, and concentrated *in vacuo* to give a crude residue. The crude product was purified by flash column chromatography with 20% EtOAc–hexane to afford **1j** (*R<sub>f</sub>* = 0.26 in 40% EtOAc–hexane; 27.4 mg, 51% yield) as pale yellow solids. Selected data for **1j**:<sup>14</sup> m.p. 254–256°C (decomp); IR (ATR)  $\nu_{\text{max}}$ : 3363, 1722, 1653, 1622, 1498, 1420, 1253, 1041, 796, 765, 703 cm<sup>-1</sup>; <sup>1</sup>H NMR (400 MHz, DMSO-d<sub>6</sub>):  $\delta$  10.79 (brs, 2 H), 7.81 (s, 1 H), 7.34 (dd, *J* = 8.4, 2.0 Hz, 1 H), 7.26 (s, 1 H), 7.23 (d, *J* = 8.4 Hz, 2 H), 7.11 (s, 2 H), 7.01 (d, *J* = 2.0 Hz, 2 H), 6.91 – 6.82 (m, 3 H), 2.24 (s, 3 H), 2.21 (s, 6 H); <sup>13</sup>C NMR (100 MHz, DMSO-d<sub>6</sub>):  $\delta$  200.8 (C), 159.1 (C), 138.6 (CH), 135.3 (two C), 126.4 (two C), 125.9 (two C), 125.8 (C), 124.0 (two CH), 123.6 (CH), 122.6 (two CH), 120.2 (two CH), 118.0 (C), 113.7 (two C), 111.9 (CH), 111.2 (two CH), 68.0 (C), 21.4 (two CH<sub>3</sub>), 20.1 (CH<sub>3</sub>);<sup>2c</sup> MS (*m/z*, relative intensity): 406 (M<sup>+</sup>+1, 4), 405 (M<sup>+</sup>, 18), 377 (16), 376 (52), 359 (12), 330 (11), 274 (15), 246 (32), 165 (46), 149 (19), 130 (21), 105 (49), 84 (77), 66 (100); exact mass calculated for C<sub>27</sub>H<sub>23</sub>N<sub>3</sub>O (M<sup>+</sup>): 405.1841; found: 405.1846.

### Preparation of 5,5',5''-trimethyl-[3,2':2',3''-terindolin]-3'-one (**1j**), method 2.

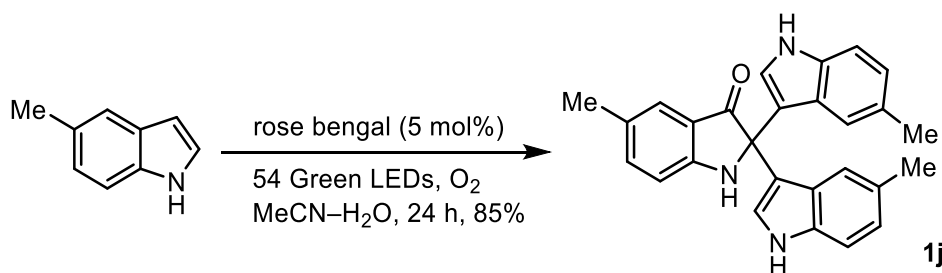

A magnetic stirring bar and 1*H*-indole-5-carbonitrile (53.2 mg, 0.41 mmol) was placed in a 10-mL Schlenk tube vial, followed by sequential addition of rose bengal (23.0 mg, 0.02 mmol, 0.06 equiv), CH<sub>3</sub>CN (2.0 mL) and H<sub>2</sub>O (1.3 mL). The Schlenk tube was equipped with a balloon of oxygen. The solution was stirred and irradiated with a strip of 54 green LEDs, located 2-5 cm away from the reaction vial, for 24 h until the completion of the reaction, as monitored by TLC. Upon completion, the reaction solution was diluted with EtOAc and extracted with water and brine. The organic solution was dried over MgSO<sub>4</sub>, and concentrated *in vacuo* to give a crude residue. The crude product was purified by flash column chromatography with 20% EtOAc–hexane to afford **1j** (*R<sub>f</sub>* = 0.26 in 40% EtOAc–hexane; 46.4 mg, 85% yield) as pale yellow solids.

<sup>14</sup> Qin, W.-B.; Chang, Q.; Bao, Y.-H.; Wang, N.; Chen, Z.-W.; Liu, L.-X. *Org. Biomol. Chem.* **2012**, *10*, 8814 – 8821.



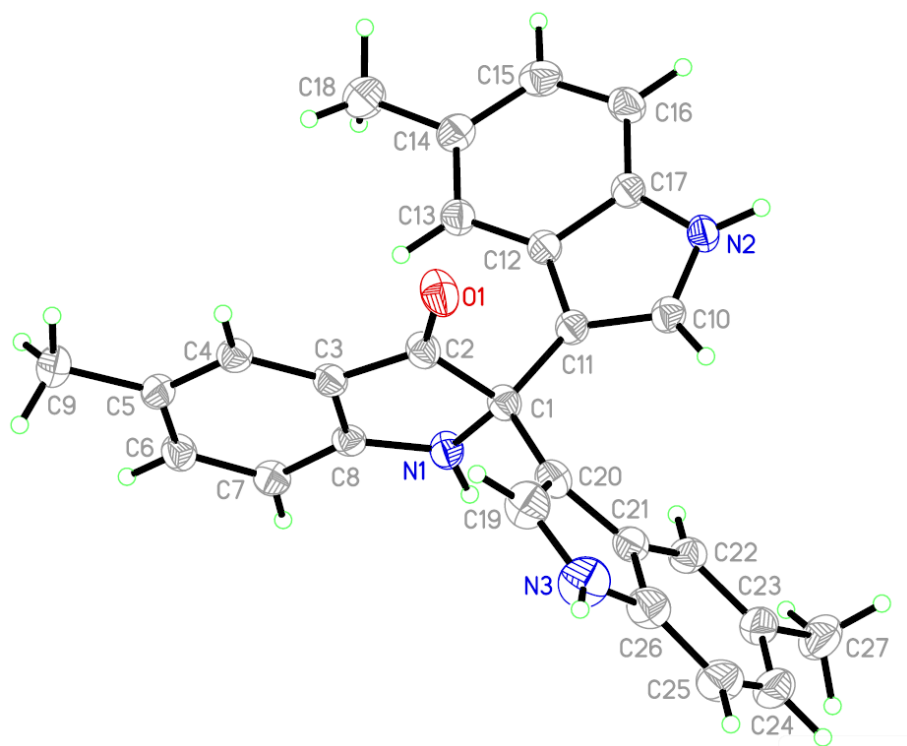

Thermal ellipsoids draw at the 50% probability level

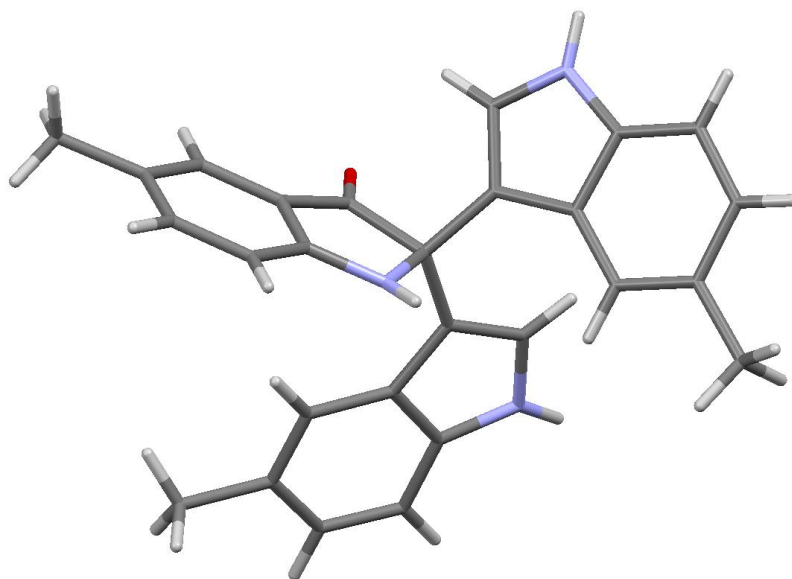

**Figure S4.** ORTEP and Stereo plots for X-ray crystal structures of **1j (ic19387)**.

CCDC 2005725 contains the supplementary crystallographic data for **1j (ic19387)**. These data can be obtained free of charge from the Cambridge Crystallographic Data Centre via [www.ccdc.cam.ac.uk](http://www.ccdc.cam.ac.uk)

Table S3. Crystal data and structure refinement for **1j** (ic19387).

|                                   |                                                  |                   |
|-----------------------------------|--------------------------------------------------|-------------------|
| Identification code               | ic19387                                          |                   |
| Empirical formula                 | C <sub>27</sub> H <sub>23</sub> N <sub>3</sub> O |                   |
| Formula weight                    | 405.48                                           |                   |
| Temperature                       | 200(2) K                                         |                   |
| Wavelength                        | 1.54178 Å                                        |                   |
| Crystal system                    | Triclinic                                        |                   |
| Space group                       | P-1                                              |                   |
| Unit cell dimensions              | a = 10.4157(2) Å                                 | α = 112.5285(8)°. |
|                                   | b = 10.5063(2) Å                                 | β = 108.7529(8)°. |
|                                   | c = 11.3815(2) Å                                 | γ = 99.9684(8)°.  |
| Volume                            | 1024.96(3) Å <sup>3</sup>                        |                   |
| Z                                 | 2                                                |                   |
| Density (calculated)              | 1.314 Mg/m <sup>3</sup>                          |                   |
| Absorption coefficient            | 0.637 mm <sup>-1</sup>                           |                   |
| F(000)                            | 428                                              |                   |
| Crystal size                      | 0.119 x 0.070 x 0.041 mm <sup>3</sup>            |                   |
| Theta range for data collection   | 4.650 to 74.991°.                                |                   |
| Index ranges                      | -13<=h<=12, -13<=k<=13, -14<=l<=14               |                   |
| Reflections collected             | 8034                                             |                   |
| Independent reflections           | 4193 [R(int) = 0.0127]                           |                   |
| Completeness to theta = 67.679°   | 99.9 %                                           |                   |
| Absorption correction             | Semi-empirical from equivalents                  |                   |
| Max. and min. transmission        | 0.7539 and 0.7086                                |                   |
| Refinement method                 | Full-matrix least-squares on F <sup>2</sup>      |                   |
| Data / restraints / parameters    | 4193 / 0 / 295                                   |                   |
| Goodness-of-fit on F <sup>2</sup> | 1.040                                            |                   |
| Final R indices [I>2sigma(I)]     | R1 = 0.0382, wR2 = 0.0935                        |                   |
| R indices (all data)              | R1 = 0.0437, wR2 = 0.1013                        |                   |
| Extinction coefficient            | n/a                                              |                   |
| Largest diff. peak and hole       | 0.225 and -0.205 e.Å <sup>-3</sup>               |                   |

### Preparation of **3** and *N*-(2-acetylphenyl)formamide (**4**).

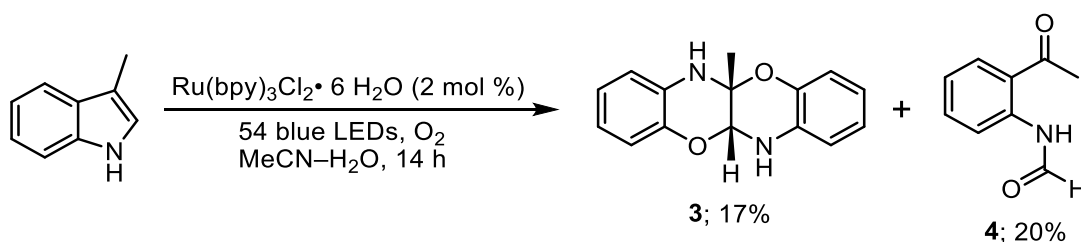

A magnetic stirring bar and 3-methyl-1*H*-indole (53.1 mg, 0.405 mmol) was placed in a 10-mL Schlenk tube vial, followed by sequential addition of Ru(bpy)<sub>3</sub>Cl<sub>2</sub>·6H<sub>2</sub>O (6.0 mg, 0.008 mmol, 0.02 equiv), CH<sub>3</sub>CN (2.0 mL) and H<sub>2</sub>O (1.3 mL). The Schlenk tube was equipped with a balloon of oxygen. The solution was stirred and irradiated with a strip of 54 blue LEDs, located 2-5 cm away from the reaction vial, for 14 h until the completion of the reaction, as monitored by TLC. Upon completion, the reaction solution was diluted with EtOAc and extracted with water and brine. The organic solution was dried over MgSO<sub>4</sub>, and concentrated *in vacuo* to give a crude residue. The crude product was purified by flash column chromatography with 20% EtOAc–hexane to afford **3** (*R<sub>f</sub>* = 0.65 in 40% EtOAc–hexane; 8.8 mg, 17% yield) as white solids, and **4** (*R<sub>f</sub>* = 0.52 in 40% EtOAc–hexane; 13.2 mg, 20% yield) as white solids.

Selected data for **3**:<sup>15</sup> m.p. 205-206 °C; IR (neat): 3368, 2925, 1606, 1500, 1309, 1248, 1143, 742 cm<sup>-1</sup>; <sup>1</sup>H NMR (500 MHz, CDCl<sub>3</sub>): δ 6.83 – 6.68 (m, 7 H), 6.63 (dd, *J* = 7.8, 1.4 Hz, 1 H), 5.06 (d, *J* = 3.9 Hz, 1 H), 4.88 (brs, 1 H), 4.64 (brs, 1 H), 1.52 (s, 3 H); <sup>13</sup>C NMR (125 MHz, CDCl<sub>3</sub>): δ 141.8 (C), 141.5 (C), 129.3 (C), 127.6 (C), 121.8 (CH), 121.5 (CH), 120.8 (CH), 120.3 (CH), 117.3 (CH), 116.7 (CH), 115.1 (CH), 114.5 (CH), 79.3 (C), 79.0 (CH), 22.8 (CH<sub>3</sub>); MS (*m/z*, relative intensity): 255 (M<sup>+</sup>+H, 18), 254 (M<sup>+</sup>, 100), 225 (3), 147 (53), 146 (52), 134 (56), 120 (37); exact mass calculated for C<sub>15</sub>H<sub>14</sub>N<sub>2</sub>O<sub>2</sub> (M<sup>+</sup>): 254.1055; found: 254.1047.

Selected data for **4**:<sup>16</sup> m.p. 76-77 °C; lit. 75–76 °C;<sup>17</sup> 77 °C.<sup>18</sup> IR (neat): 3252, 1700, 1654, 1578, 1508, 1452, 1358, 1309, 1251, 755 cm<sup>-1</sup>; <sup>1</sup>H NMR (500 MHz, CDCl<sub>3</sub>): δ 11.59 (brs, 1 H), 8.73 (d, *J* = 8.0 Hz, 1 H), 8.48 (s, 1 H), 7.90 (dd, *J* = 8.0 Hz, 1 H), 7.55 (t, *J* = 8.0 Hz, 1 H), 7.15 (t, *J* = 8.0 Hz, 1 H), 2.66 (s, 3 H); <sup>13</sup>C NMR (125 MHz, CDCl<sub>3</sub>): δ 202.7 (C), 159.9 (CH), 139.9 (C), 135.2 (CH), 131.6 (CH), 123.1 (CH), 122.0 (C), 121.6 (CH), 28.5 (CH<sub>3</sub>).

<sup>15</sup> (1) Tauer, E.; Grellmann, K.-H. *Chem. Ber.* **1990**, *123*, 1149 – 1154. (2) Barluenga, J.; Aznar, F.; Liz, R.; Cabal, M.-P.; Cano, F. H.; Foces-Foces, C. *Chem. Ber.* **1986**, *119*, 887 – 899.

<sup>16</sup> Yang, S.; Li, P.; Wang, Z.; Wang, L. *Org. Lett.* **2017**, *19*, 3386 – 3389. (2) Li, X.; Huang, H.; Yu, C.; Zhang, Y.; Li, H.; Wang, W. *Org. Lett.* **2016**, *18*, 5744 – 5747. (3) He, J.; Dong, J.; Su, L.; Wu, S.; Liu, L.; Yin, S.-F.; Zhou, Y. *Org. Lett.* **2020**, *22*, 2522–2526.

<sup>17</sup> Fuerstner, A.; Jumbam, D. N. *Tetrahedron* **1992**, *48*, 5991 – 6010.

<sup>18</sup> Chatterjee, A.; Biswas, K. M. *J. Org. Chem.*, **1973**, *38*, 23, 4002 – 4004.

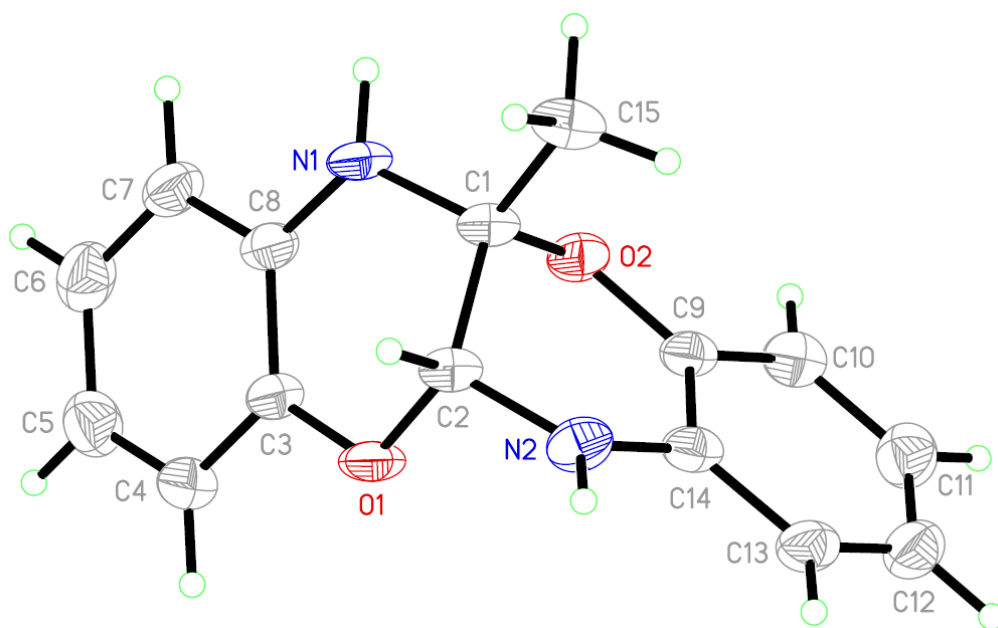

Thermal ellipsoids draw at the 50% probability level

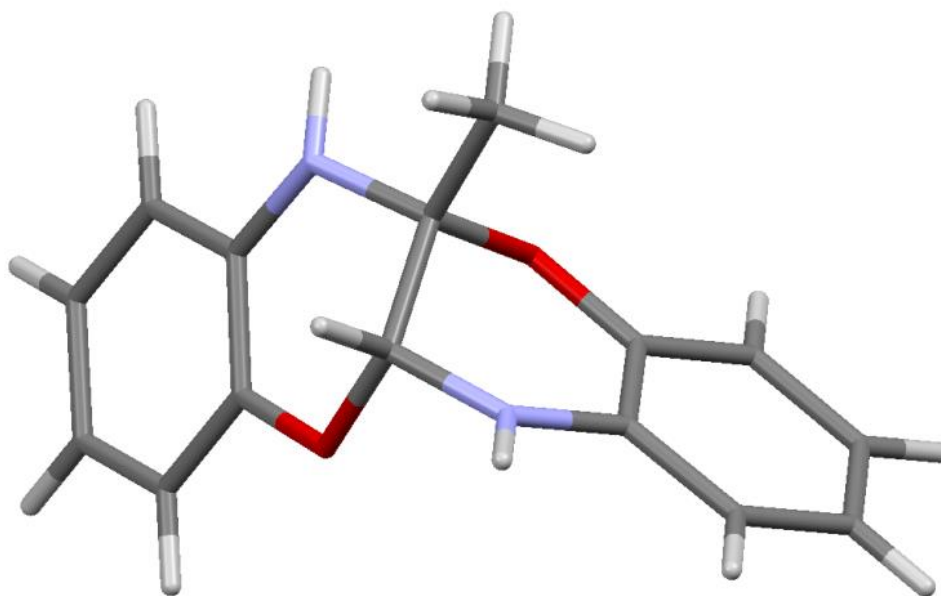

**Figure S5.** ORTEP and Stereo plots for X-ray crystal structures of **3 (ic19495)**.

CCDC 2005726 contains the supplementary crystallographic data for **3 (ic19495)**. These data can be obtained free of charge from the Cambridge Crystallographic Data Centre via [www.ccdc.cam.ac.uk](http://www.ccdc.cam.ac.uk)

Table S4. Crystal data and structure refinement for **3** (ic19495).

|                                   |                                                               |                  |
|-----------------------------------|---------------------------------------------------------------|------------------|
| Identification code               | ic19495                                                       |                  |
| Empirical formula                 | C <sub>15</sub> H <sub>14</sub> N <sub>2</sub> O <sub>2</sub> |                  |
| Formula weight                    | 254.28                                                        |                  |
| Temperature                       | 200(2) K                                                      |                  |
| Wavelength                        | 1.54178 Å                                                     |                  |
| Crystal system                    | Monoclinic                                                    |                  |
| Space group                       | P2 <sub>1</sub> /c                                            |                  |
| Unit cell dimensions              | a = 19.1254(4) Å                                              | α = 90°.         |
|                                   | b = 5.49360(10) Å                                             | β = 98.8783(9)°. |
|                                   | c = 11.5714(3) Å                                              | γ = 90°.         |
| Volume                            | 1201.21(5) Å <sup>3</sup>                                     |                  |
| Z                                 | 4                                                             |                  |
| Density (calculated)              | 1.406 Mg/m <sup>3</sup>                                       |                  |
| Absorption coefficient            | 0.770 mm <sup>-1</sup>                                        |                  |
| F(000)                            | 536                                                           |                  |
| Crystal size                      | 0.376 x 0.049 x 0.035 mm <sup>3</sup>                         |                  |
| Theta range for data collection   | 2.338 to 74.885°.                                             |                  |
| Index ranges                      | -23 ≤ h ≤ 23, -6 ≤ k ≤ 6, -14 ≤ l ≤ 14                        |                  |
| Reflections collected             | 8444                                                          |                  |
| Independent reflections           | 2456 [R(int) = 0.0218]                                        |                  |
| Completeness to theta = 67.679°   | 99.8 %                                                        |                  |
| Absorption correction             | Semi-empirical from equivalents                               |                  |
| Max. and min. transmission        | 0.7539 and 0.6179                                             |                  |
| Refinement method                 | Full-matrix least-squares on F <sup>2</sup>                   |                  |
| Data / restraints / parameters    | 2456 / 0 / 181                                                |                  |
| Goodness-of-fit on F <sup>2</sup> | 1.063                                                         |                  |
| Final R indices [I > 2σ(I)]       | R1 = 0.0444, wR2 = 0.1113                                     |                  |
| R indices (all data)              | R1 = 0.0473, wR2 = 0.1148                                     |                  |
| Extinction coefficient            | n/a                                                           |                  |
| Largest diff. peak and hole       | 0.308 and -0.246 e.Å <sup>-3</sup>                            |                  |

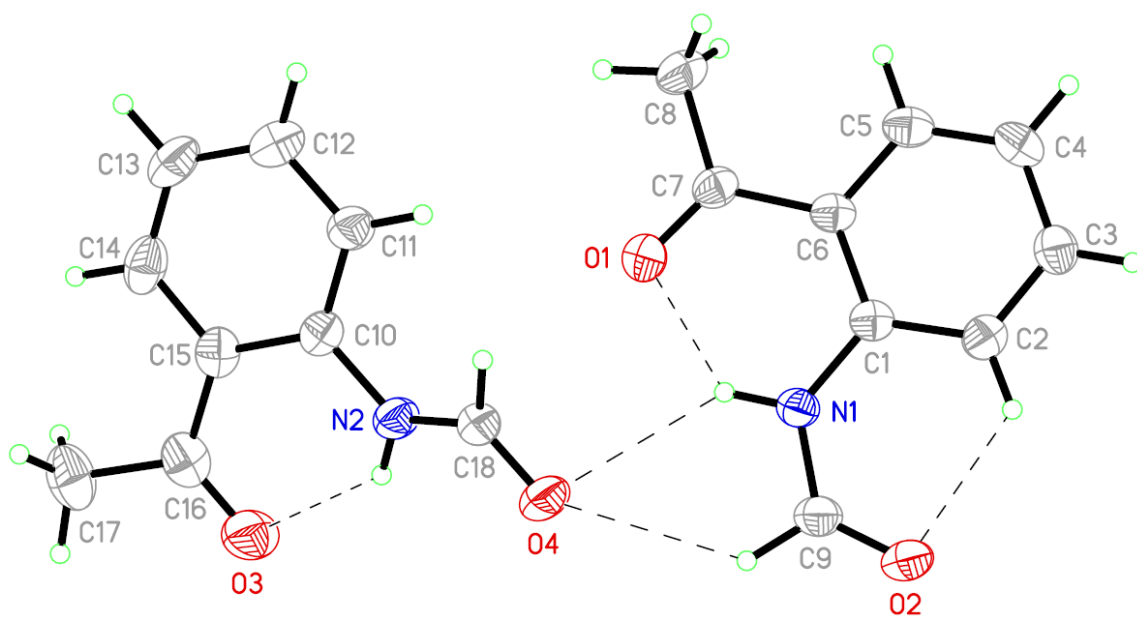

Thermal ellipsoids draw at the 50% probability level

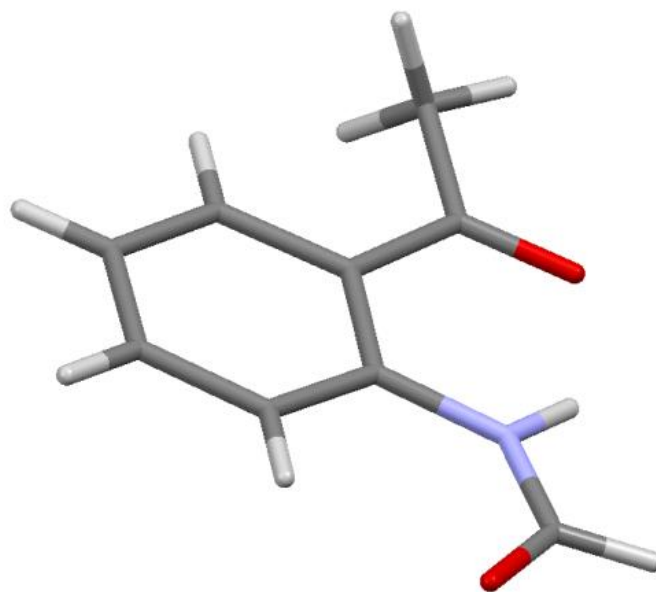

**Figure S6.** ORTEP and Stereo plots for X-ray crystal structures of **4 (ic19457)**.

CCDC 2005727 contains the supplementary crystallographic data for **4 (ic19457)**. These data can be obtained free of charge from the Cambridge Crystallographic Data Centre via [www.ccdc.cam.ac.uk](http://www.ccdc.cam.ac.uk)

Table S5. Crystal data and structure refinement for **4** (ic19457).

|                                   |                                                |                    |
|-----------------------------------|------------------------------------------------|--------------------|
| Identification code               | ic19457                                        |                    |
| Empirical formula                 | C <sub>9</sub> H <sub>9</sub> N O <sub>2</sub> |                    |
| Formula weight                    | 163.17                                         |                    |
| Temperature                       | 200(2) K                                       |                    |
| Wavelength                        | 1.54178 Å                                      |                    |
| Crystal system                    | Monoclinic                                     |                    |
| Space group                       | Pn                                             |                    |
| Unit cell dimensions              | a = 14.1319(5) Å                               | α = 90°.           |
|                                   | b = 3.86820(10) Å                              | β = 110.9456(10)°. |
|                                   | c = 15.5153(5) Å                               | γ = 90°.           |
| Volume                            | 792.10(4) Å <sup>3</sup>                       |                    |
| Z                                 | 4                                              |                    |
| Density (calculated)              | 1.368 Mg/m <sup>3</sup>                        |                    |
| Absorption coefficient            | 0.806 mm <sup>-1</sup>                         |                    |
| F(000)                            | 344                                            |                    |
| Crystal size                      | 0.471 x 0.059 x 0.029 mm <sup>3</sup>          |                    |
| Theta range for data collection   | 3.635 to 74.974°.                              |                    |
| Index ranges                      | -17<=h<=17, -4<=k<=4, -19<=l<=18               |                    |
| Reflections collected             | 5152                                           |                    |
| Independent reflections           | 2954 [R(int) = 0.0182]                         |                    |
| Completeness to theta = 67.679°   | 99.7 %                                         |                    |
| Absorption correction             | Semi-empirical from equivalents                |                    |
| Max. and min. transmission        | 0.7539 and 0.6339                              |                    |
| Refinement method                 | Full-matrix least-squares on F <sup>2</sup>    |                    |
| Data / restraints / parameters    | 2954 / 2 / 235                                 |                    |
| Goodness-of-fit on F <sup>2</sup> | 1.049                                          |                    |
| Final R indices [I>2sigma(I)]     | R1 = 0.0260, wR2 = 0.0687                      |                    |
| R indices (all data)              | R1 = 0.0270, wR2 = 0.0704                      |                    |
| Absolute structure parameter      | 0.22(9)                                        |                    |
| Extinction coefficient            | n/a                                            |                    |
| Largest diff. peak and hole       | 0.132 and -0.112 e.Å <sup>-3</sup>             |                    |

### Homemade photoredox flow reactor device for circular flow experiments.

A 1000-mL glass graduated cylinder with approximately 39 cm in height and 7.3 cm in diameter was used for the construction of the circular photoreactor device, as shown in the following photos. The cylinder was coiled with a 7.5 meter PFA tube (ID: 2 mm and OD: 3 mm, total volume ca. 24 mL). The coiled PFA tube covered the 10.2-cm height of the cylinder and resulted in an area of  $11 \text{ cm} \times 7.3 \text{ cm} \times 3.14 = 234 \text{ cm}^2$  exposure to the LED light. In the external surface of the PFA tube coiled cylinder, nine blue LED strips (each with 18 LED beads) are secured with insulating tape and placed in the center. A peristaltic pump (LongerPump, BT100-2J, YZ1515x) was used for delivering the solution of indole (**2a**, 2.0 g, 17.1 mmol) and 40% H<sub>2</sub>O/CH<sub>3</sub>CN (170 mL) at a certain flow rate stream to the photoredox flow reactor. At the speed of 100 rpm, a flow rate of 20 mL/min, the first drop of the reaction solution took only 72 seconds for traveling through the photoredox flow reactor device and back to the round bottle flask. The flask was equipped with a balloon of oxygen atmosphere and the inlet PFA tube was adjusted to just below the liquid level so that a small amount of gas will enter the tube when pumping liquid. In addition, the outlet tube was introduced into the reaction mixtures (Note: An oxygen environment is critical to the completion of the reaction; therefore, the solution must be repeatedly exposed to oxygen and then subjected to blue light irradiation. With careful sealing, a single balloon of oxygen can last for the duration of the circular flow reaction without the need to refill the oxygen gas).

A magnetic stirring bar and indole (2.00 g, 17.1 mmol) were placed in a 250-mL round bottle flask, followed by sequential addition of Ru(bpy)<sub>3</sub>Cl<sub>2</sub>•6H<sub>2</sub>O (384 mg, 0.05 mmol, 0.03 equiv), CH<sub>3</sub>CN (102 mL) and H<sub>2</sub>O (68 mL). The flask was equipped with a balloon of oxygen. The solution was stirred and connected with a set of PFA tube and flow reaction device as described above. The reaction mixture was stirred and irradiated for 24 h, and the reaction solution was extracted with EtOAc and brine. The organic solution was filtered through a pad of Celite, silica gel, and MgSO<sub>4</sub>, and concentrated *in vacuo* to give a crude residue. The crude product was purified by recrystallization from EtOAc and hexane, and the mother liquor was purified by flash column chromatography with 30% EtOAc–hexane. The combined yellow solid product **1a** was obtained in 1.52 g (73% yield).

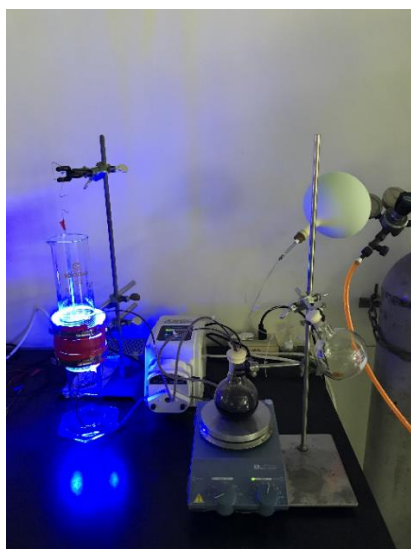

irradiation device

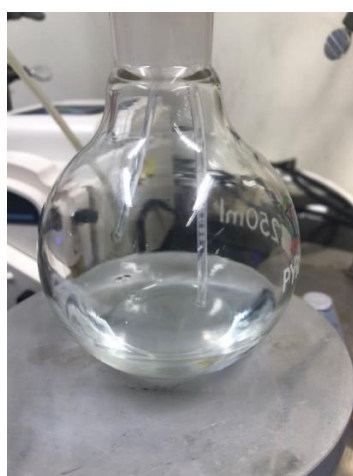

layout of the inlet and outlet PFA tube  
(For clarity, solvent only, no catalysts and indole in the above two photos)

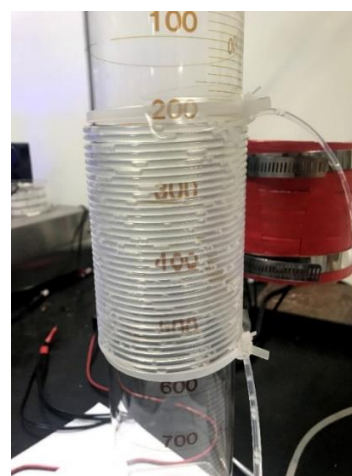

bubbles in the PFA tube



### Circular flow Experiments for the reaction of **2h**

A magnetic stirring bar and indole **2h** (2.00 g, 8.23 mmol) was placed in a 250-mL round bottle flask, followed by sequential addition of Ru(bpy)<sub>3</sub>Cl<sub>2</sub>•6H<sub>2</sub>O (182 mg, 0.02 mmol, 0.03 equiv), CH<sub>3</sub>CN (49 mL) and H<sub>2</sub>O (33 mL). The flask was equipped with a balloon of oxygen. With careful sealing, a single balloon of oxygen can last for the duration of the circular flow reaction without the need to refill the oxygen gas). The solution was stirred and connected with a set of PFA tubes and flow reaction device as described above. The reaction mixture was stirred and irradiated for 12 h, followed by slow addition of water to precipitate the product **2h** as a mustard-color solid. The precipitate was filter through a filter paper and collected, and the product was pure enough for spectroscopic analysis. The mother liquor filtrate was extracted with EtOAc and brine. The organic solution was filter through a pad of Celite, silica gel and MgSO<sub>4</sub>, and concentrated *in vacuo* to give a crude residue. The crude product was purified by recrystallization from EtOAc and hexane, and the mother liquor was purified by flash column chromatography with 30% EtOAc–hexane. The combined mustard color solid product **1h** was obtained in 1.73 g (85% yield).

### The light on/off experiment:

A magnetic stirring bar and indole (46.8 mg, 0.40 mmol) was placed in a 10-mL Schlenk tube vial, followed by sequential addition of Ru(bpy)<sub>3</sub>Cl<sub>2</sub>•6H<sub>2</sub>O (3.0 mg, 0.004 mmol, 0.01 equiv), a solution of CH<sub>3</sub>CN (2.0 mL) and H<sub>2</sub>O (1.3 mL), and 1,3,5-trimethylbenzene (18 μL, 0.13 mmol, 0.32 equiv). The Schlenk tube was equipped with a balloon of oxygen. The solution was stirred and irradiated with a strip of 54 blue LEDs, located 2-5 cm away from the reaction vial. After the indicated reaction time, ~50 μL of the reaction mixture aliquot was collected, diluted with acetone-d<sub>6</sub> and analyzed by <sup>1</sup>H NMR.<sup>19</sup>

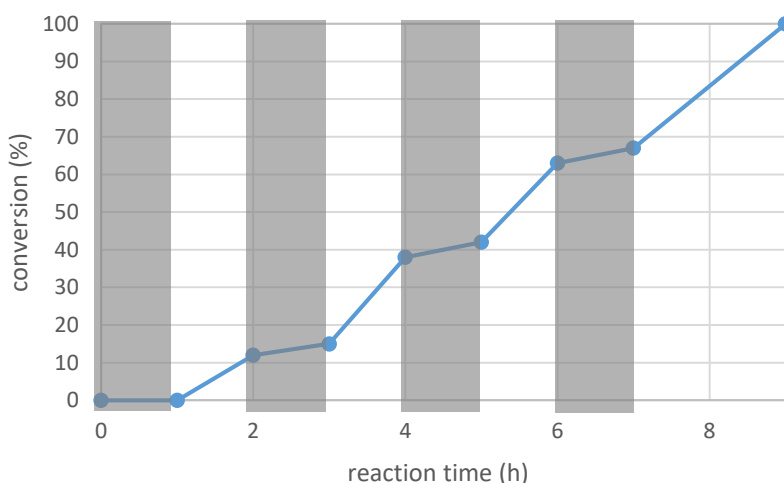

**Fig S7.** Conversion of **2a** to **1a** with ruthenium catalyst in the light/dark sequence.

<sup>19</sup> The transformation of indole **2a** to indolone **1a** does not solely depend on the visible-light catalysis, as a small portion of the product can be generated in the absence of light with oxygen and oxidant, *e.g.* H<sub>2</sub>O<sub>2</sub> and other radical species, but with much slower reaction rate and lower yields. As shown in Figure S6. Under light irradiation, the reaction was significantly promoted, but the reaction was slow under dark conditions. Since some H<sub>2</sub>O<sub>2</sub> and other radical species have been produced in the reaction mixture after initial light irradiation, a small amount of **1a** could be produced, but the rate is much lower and the contribution in the dark environment is also lower.

Cyclic voltammetry was measured with the following conditions:

Electrochemical measurements were performed with CHI 440 electrochemical work station (CH Instruments, Inc, Austin, TX, USA). Indoles **1** [0.1 M] TBABF<sub>4</sub> in 40%H<sub>2</sub>O/MeCN (v/v). Sweep rate: 0.1 V/s. Platinum working electrode (CHI102, CH Instruments, Inc), Non-Aqueous Ag/Ag<sup>+</sup> reference electrode ([0.01 M] AgNO<sub>3</sub>/[0.1 M] TBAP, RE-7, BAS Inc, Japan), Platinum counter electrode (5 cm, Cat. No. 002233, BAS Inc, Japan) in a voltammetry cell (SVC3, BAS Inc, Japan)

**Figure S8.** Cyclic voltammetry (versus Ag/Ag<sup>+</sup> in CH<sub>3</sub>CN) of indole **2a** in MeCN and 40% H<sub>2</sub>O/MeCN+H<sub>2</sub>O

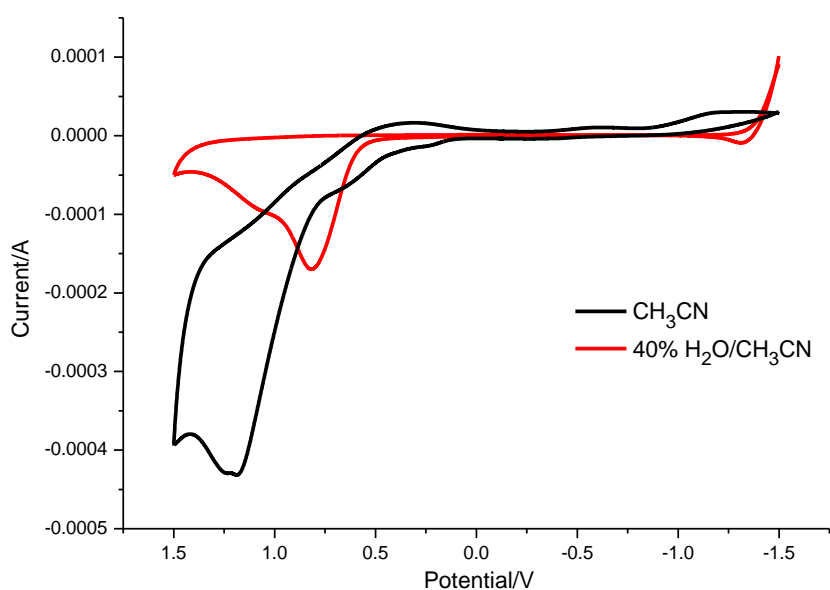

**Figure S9.** CV of indole **2a** in acetonitrile solutions with different proportions of water content (H<sub>2</sub>O/MeCN+H<sub>2</sub>O, v/v)

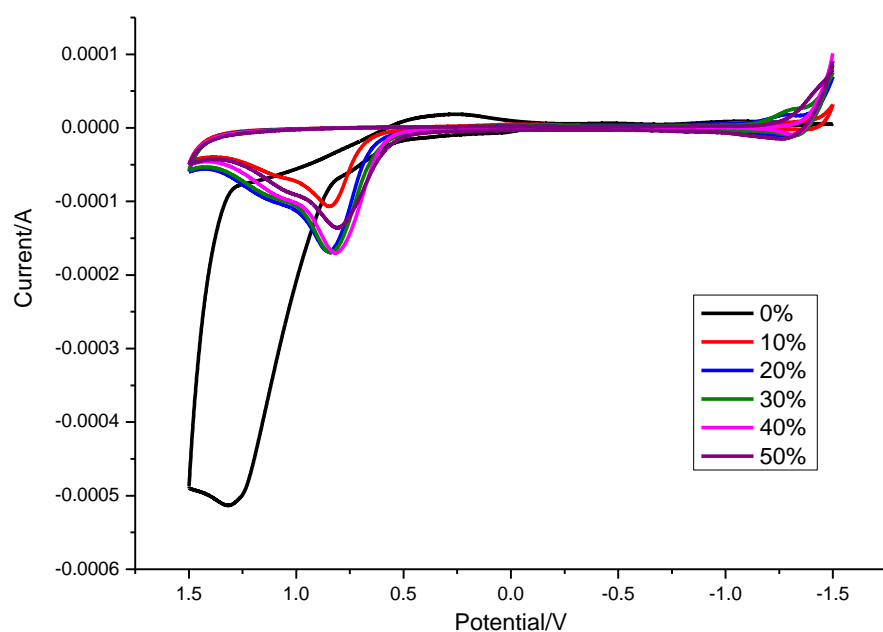

**Figure S10.** CV of triindole **1a** 40% H<sub>2</sub>O–MeCN (0.01 M), Enlarged at 1.0-0.5 V

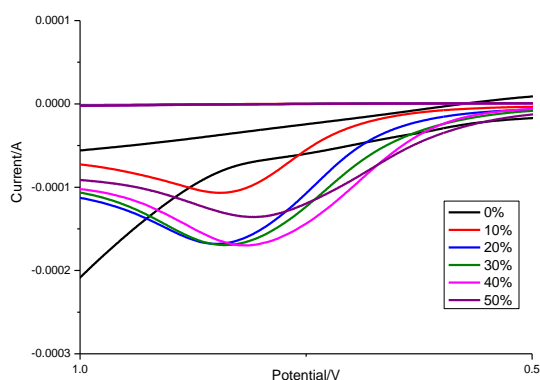

**Figure S11.** CV of indoles **2** in 40% H<sub>2</sub>O–MeCN (v/v, 0.01 M)

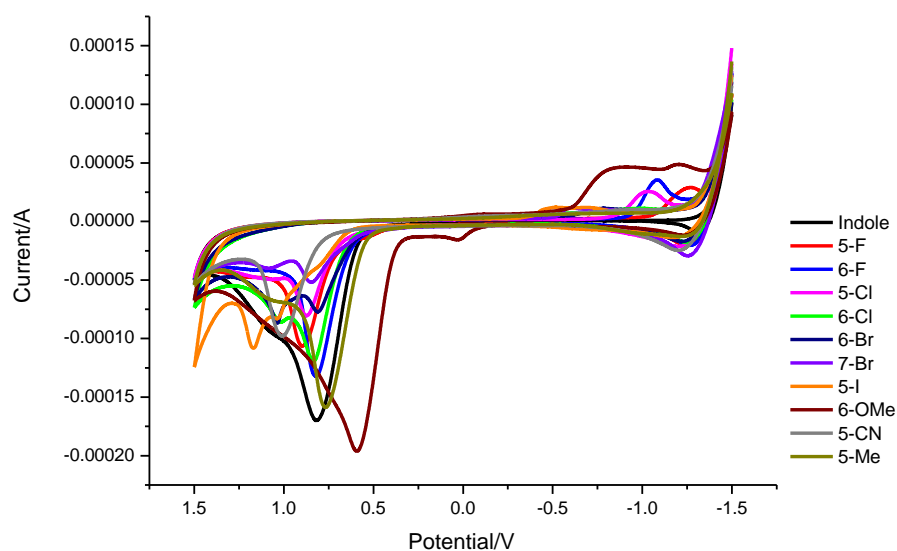

**Figure S12.** Visible light spectrum of **2a** in 40% H<sub>2</sub>O/CH<sub>3</sub>CN (0.01 M) and its spectrum after 8 hours of CFL irradiation.<sup>20</sup>

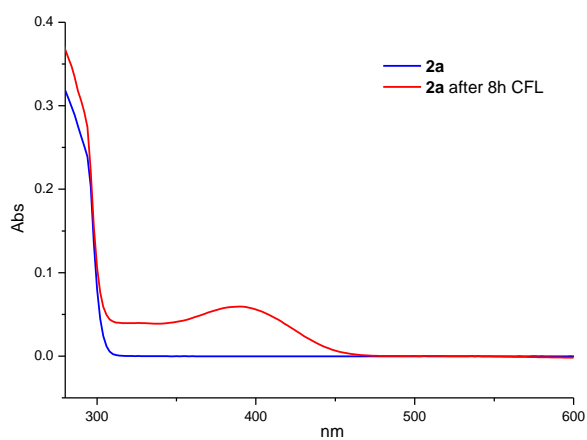

<sup>20</sup> A marked marron color appeared after a few hours of CFL-irradiation of the colorless solution of indole **2a** under a balloon of oxygen. The absorption spectrum of the solution after 8-h irradiation showed a new broad absorption band around 400 nm.

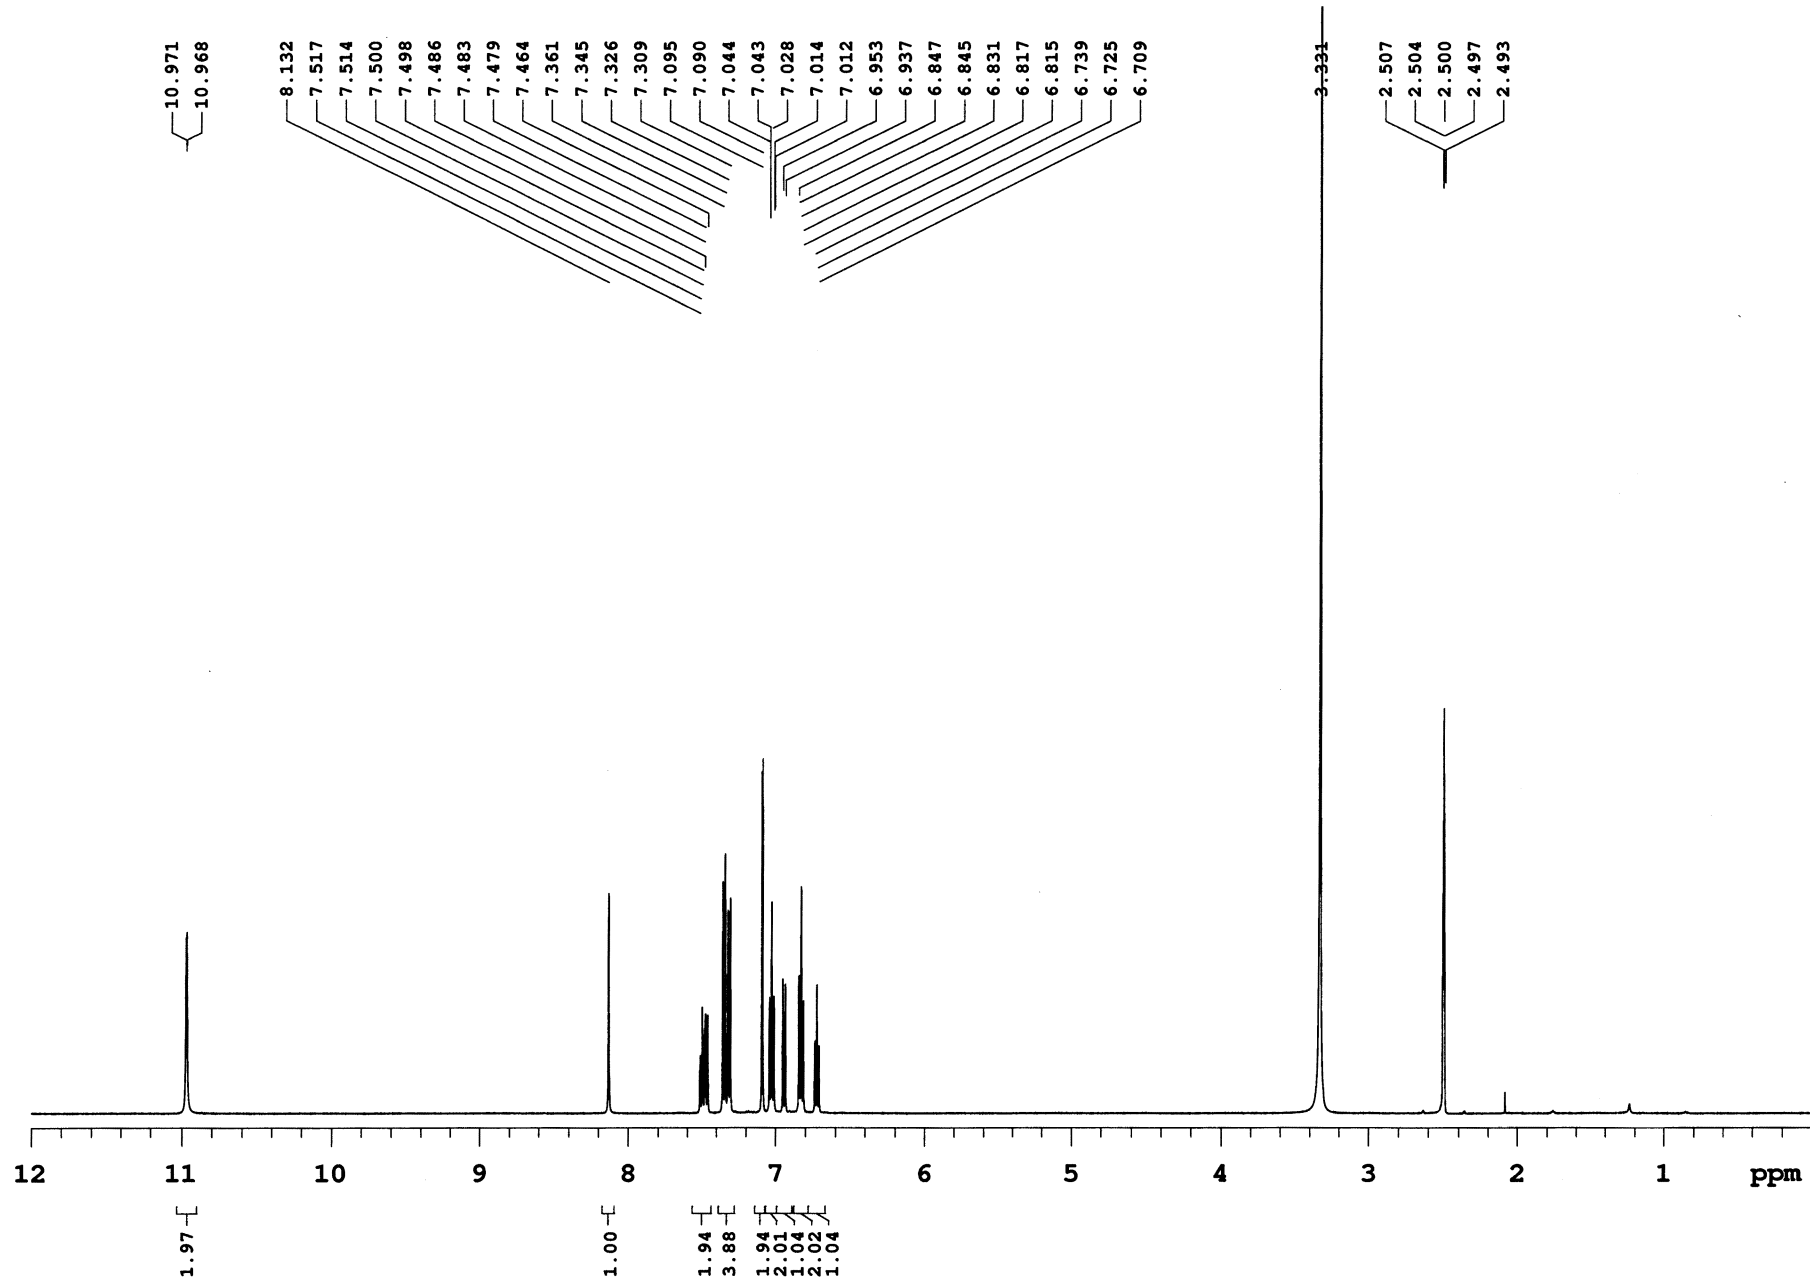

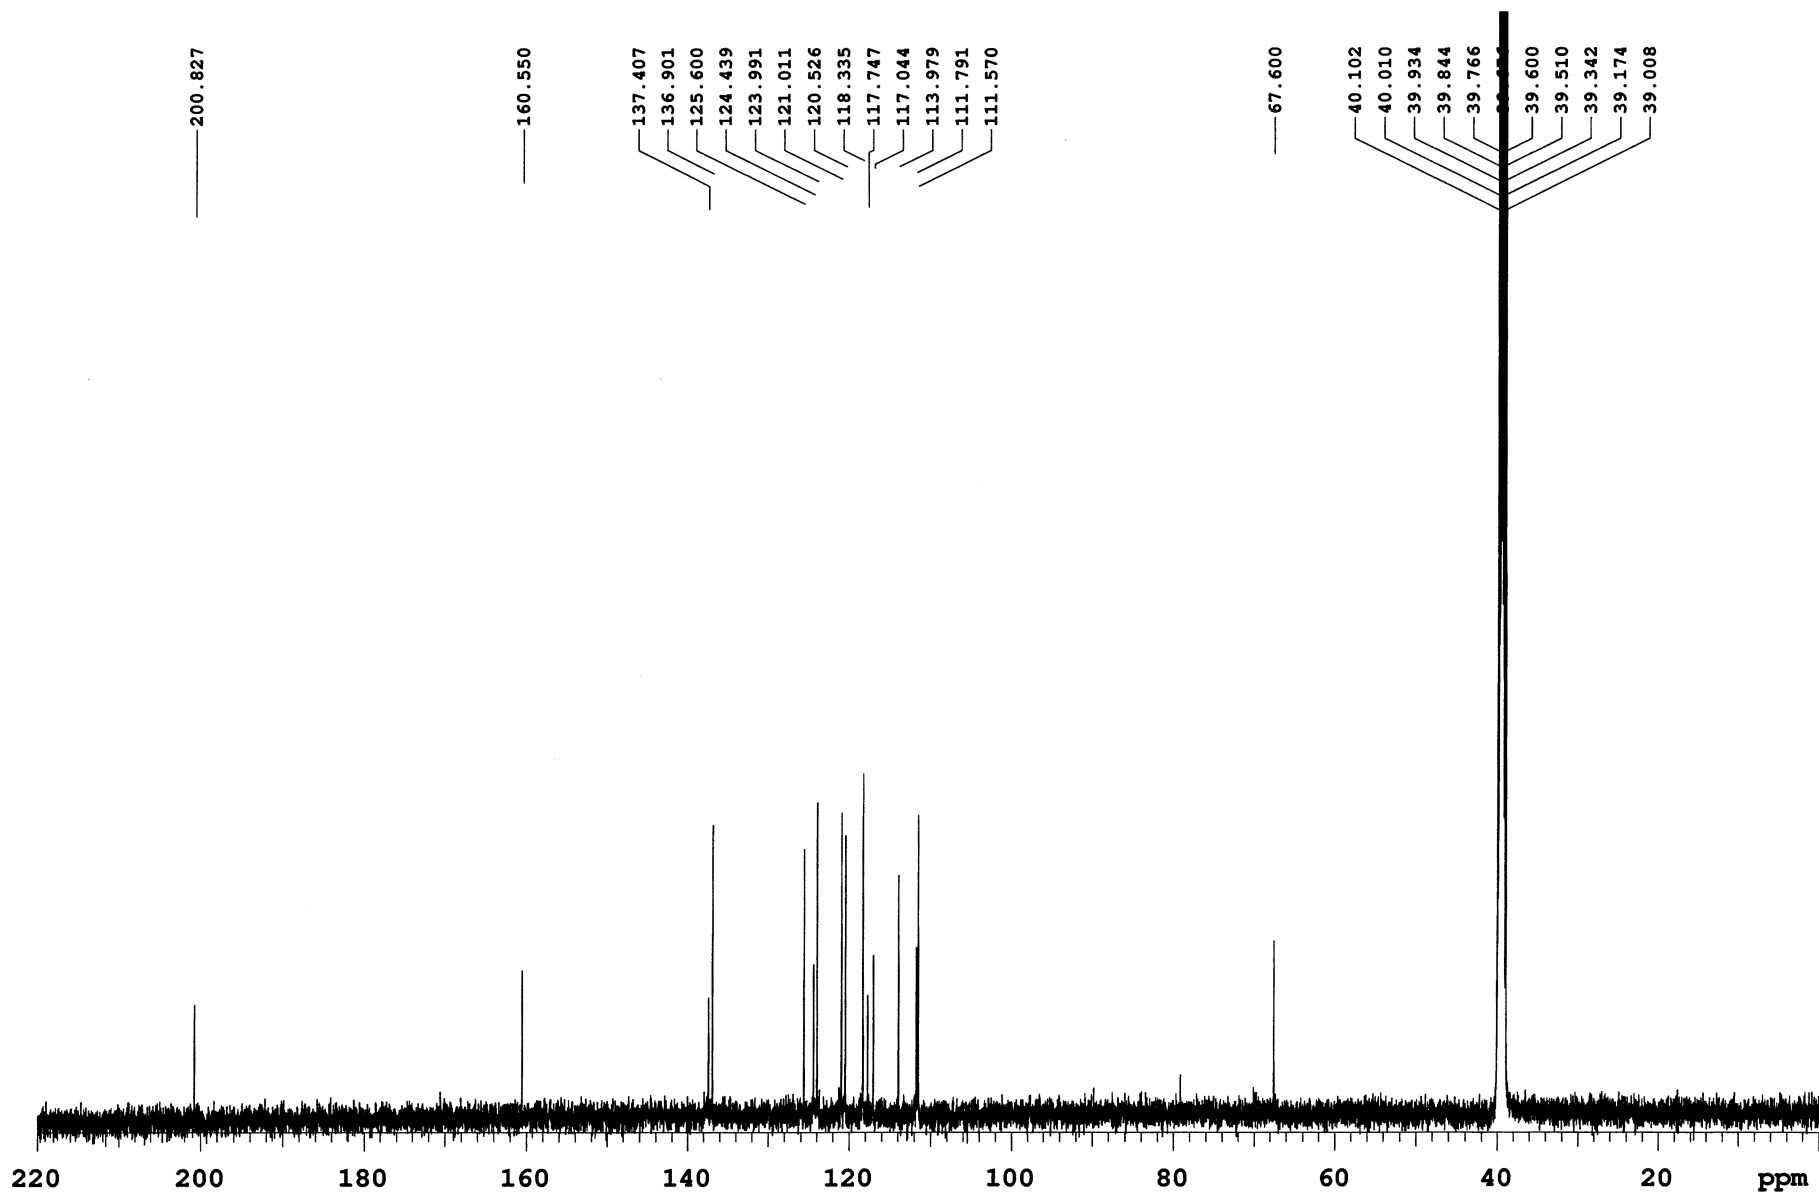

13C NMR (DMSO-d6, 125 MHz) of 1a

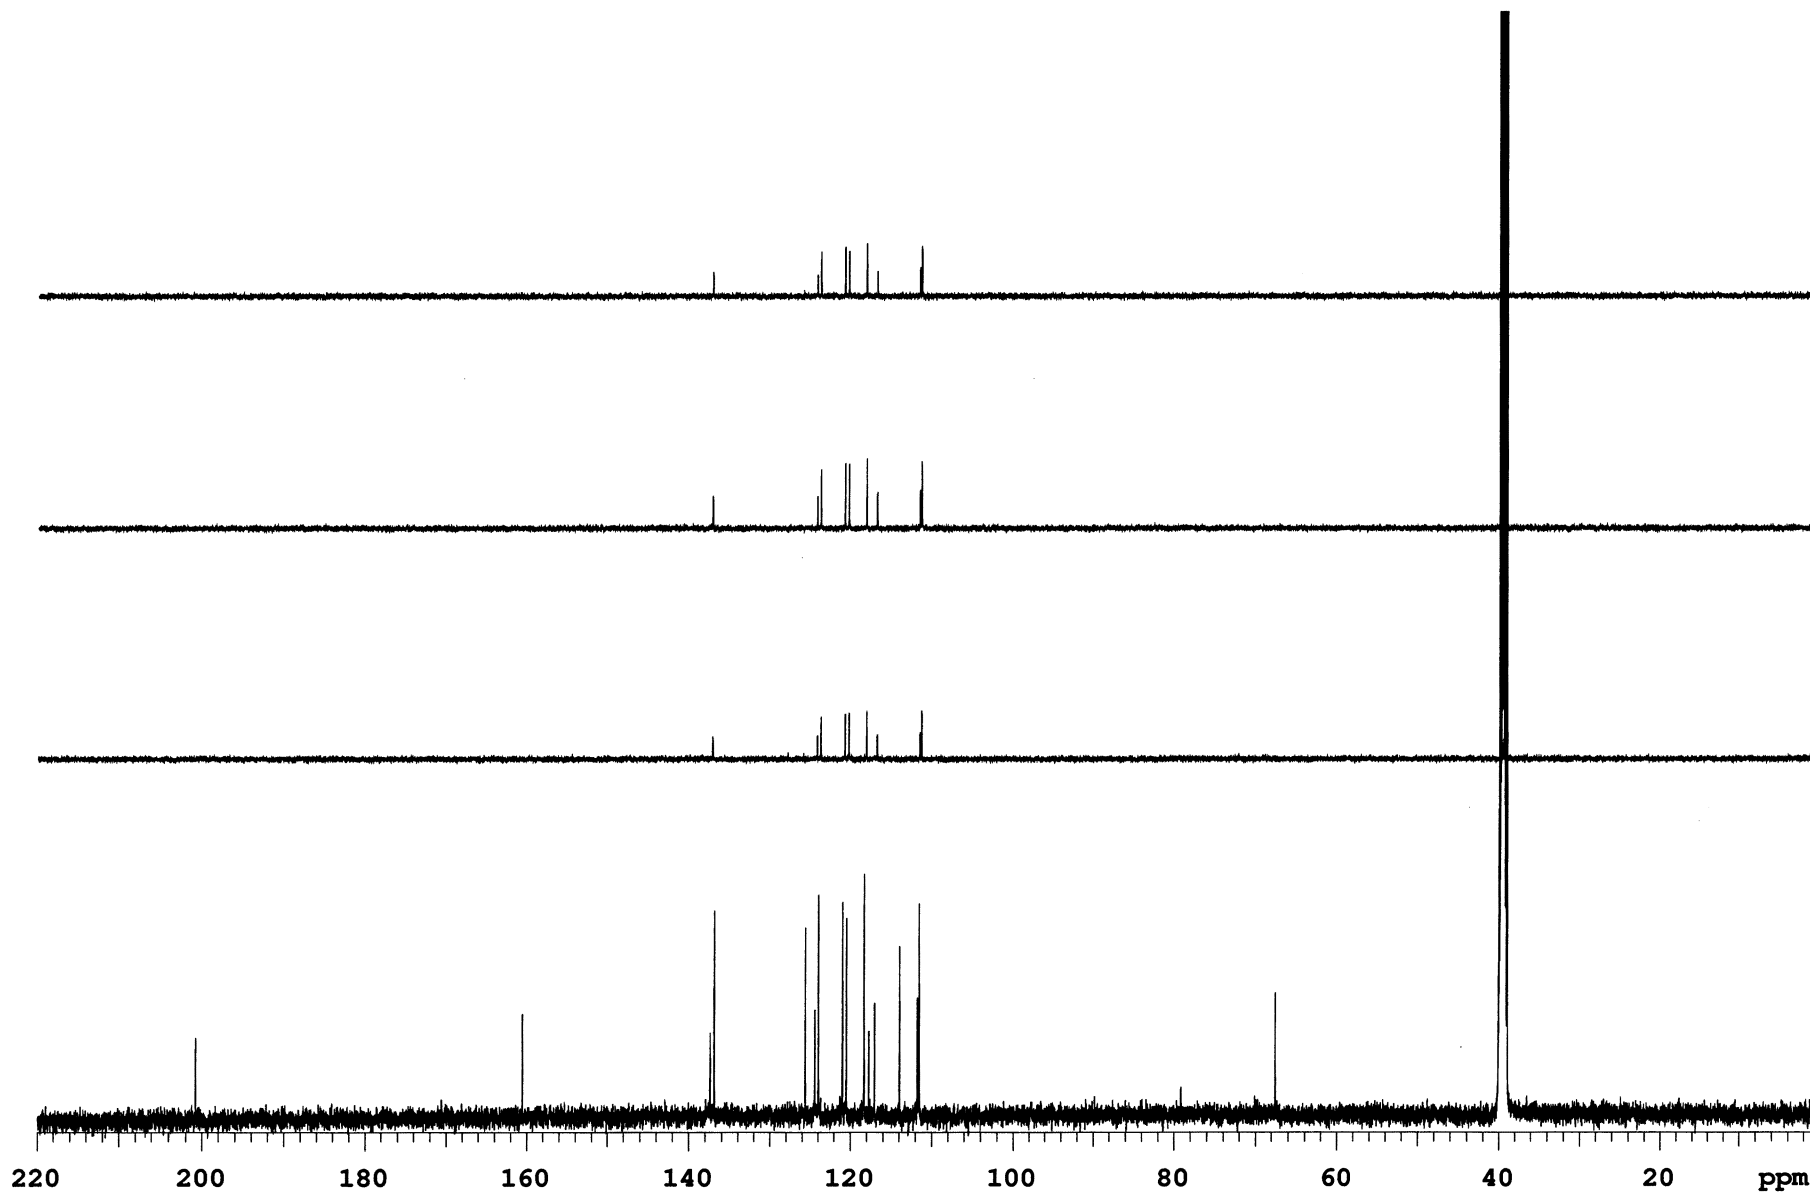

DEPT of 1a

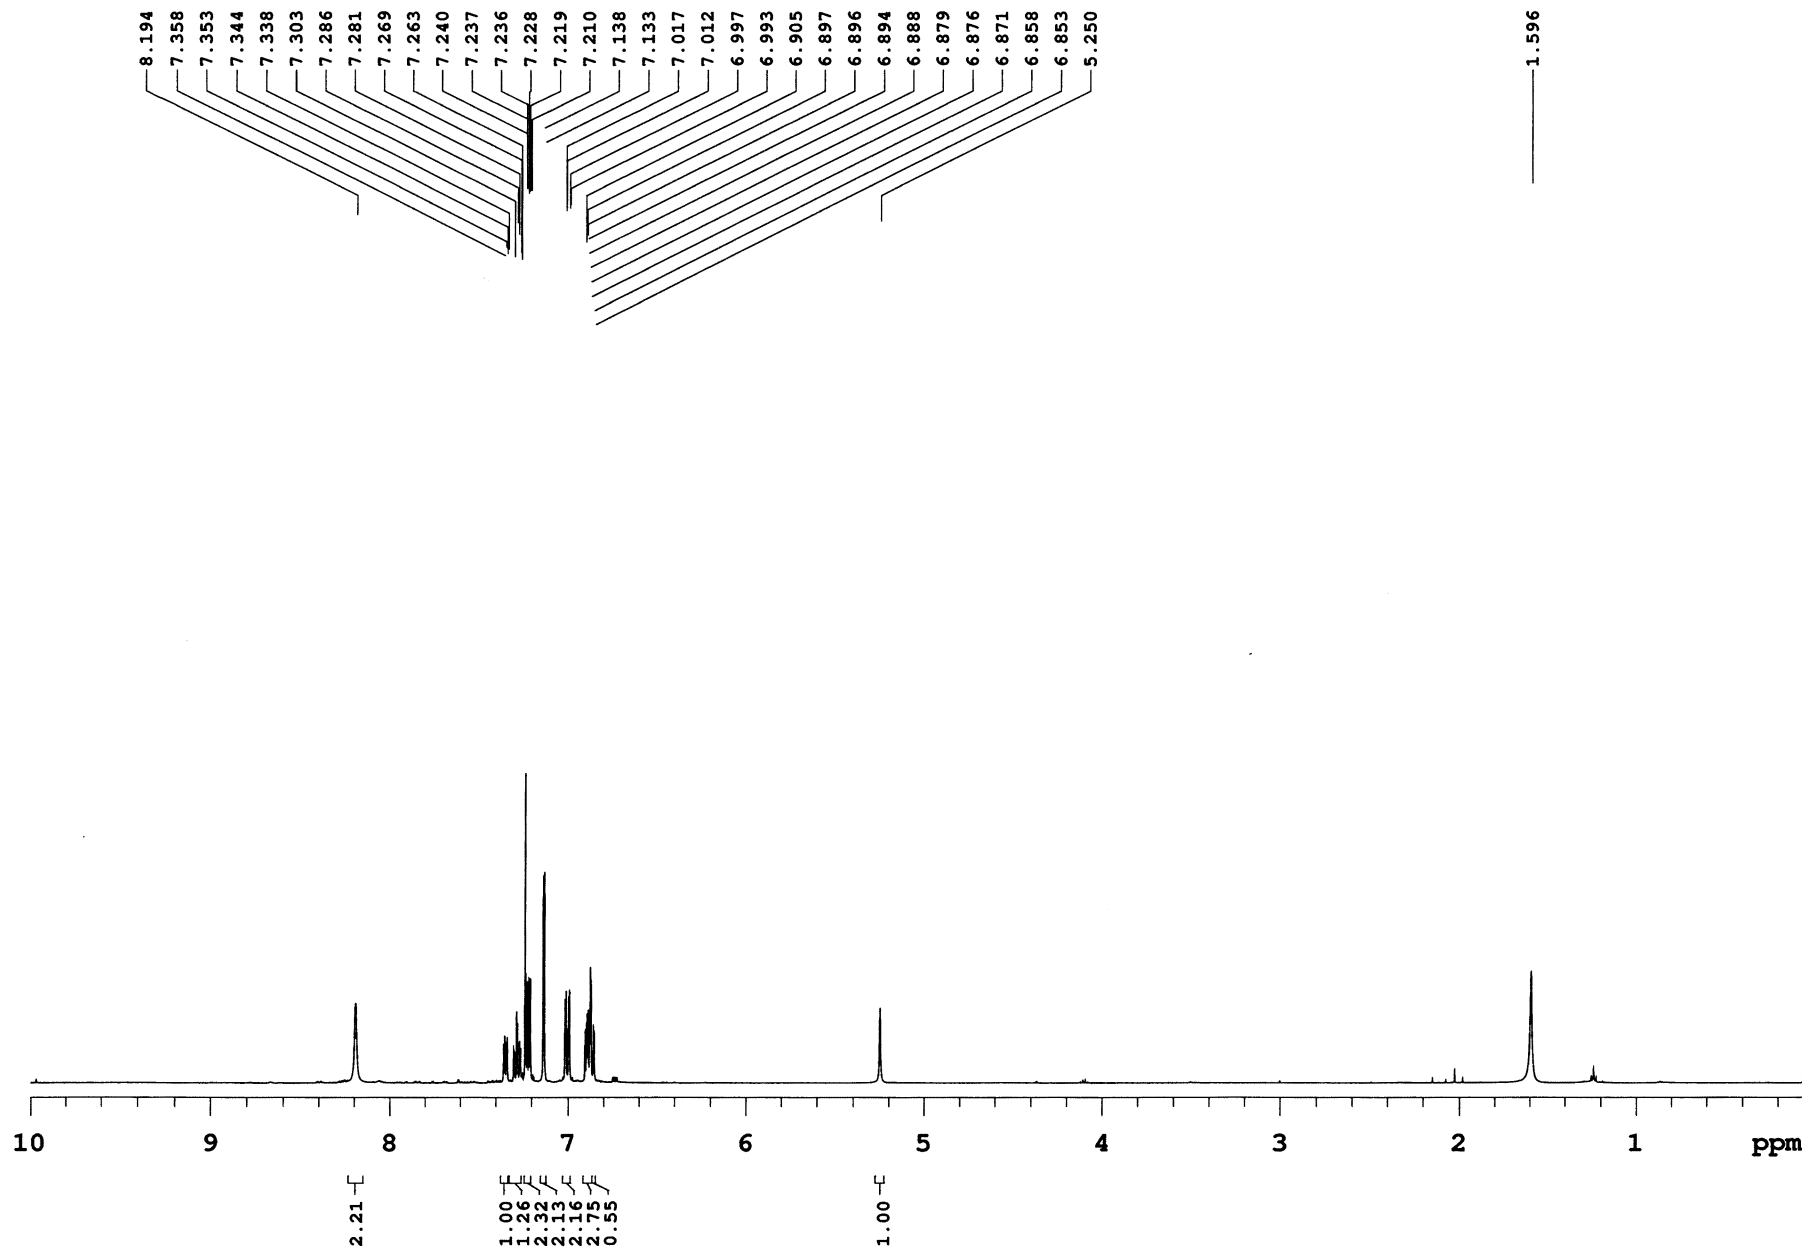 $^1\text{H}$  NMR (CDCl<sub>3</sub>, 500 Hz) of **1b**

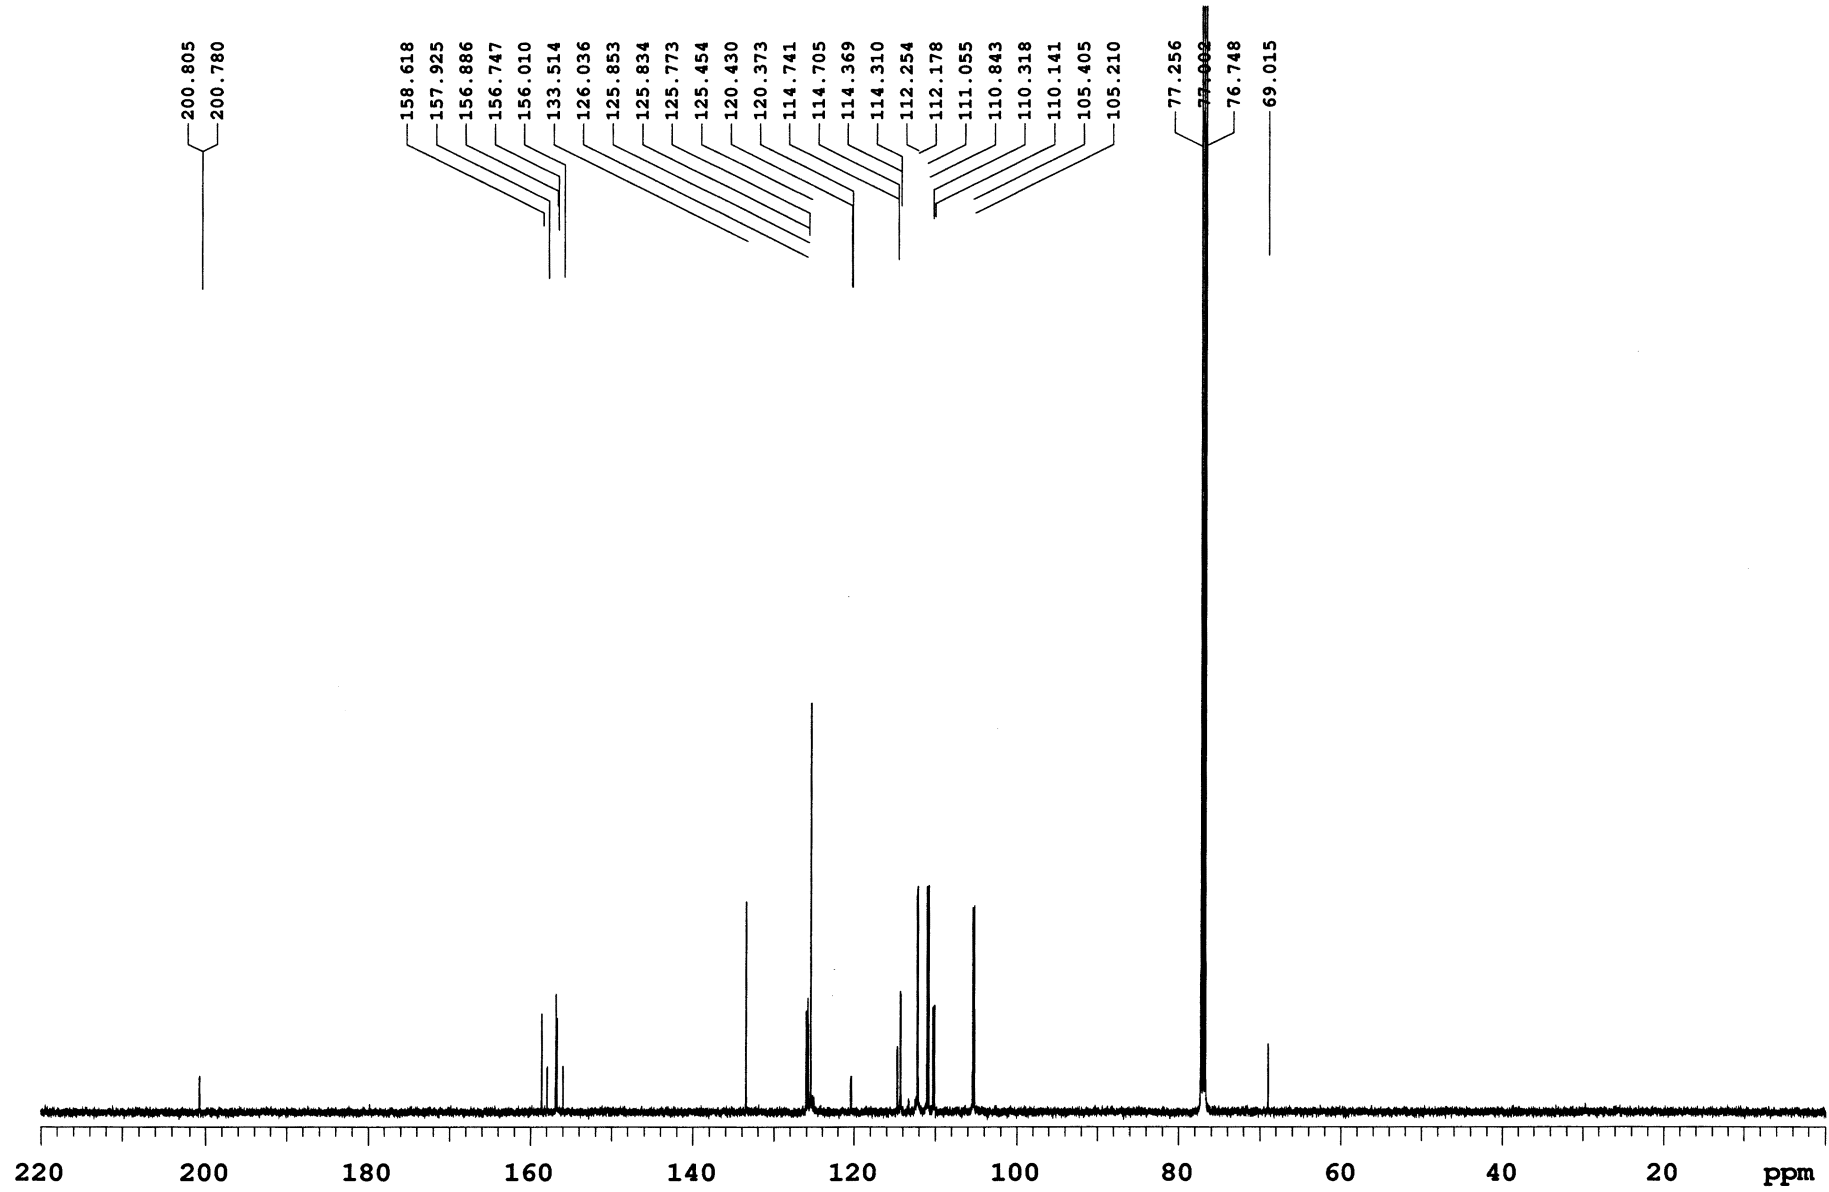13C NMR (CDCl<sub>3</sub>, 125 Hz) of **1b**



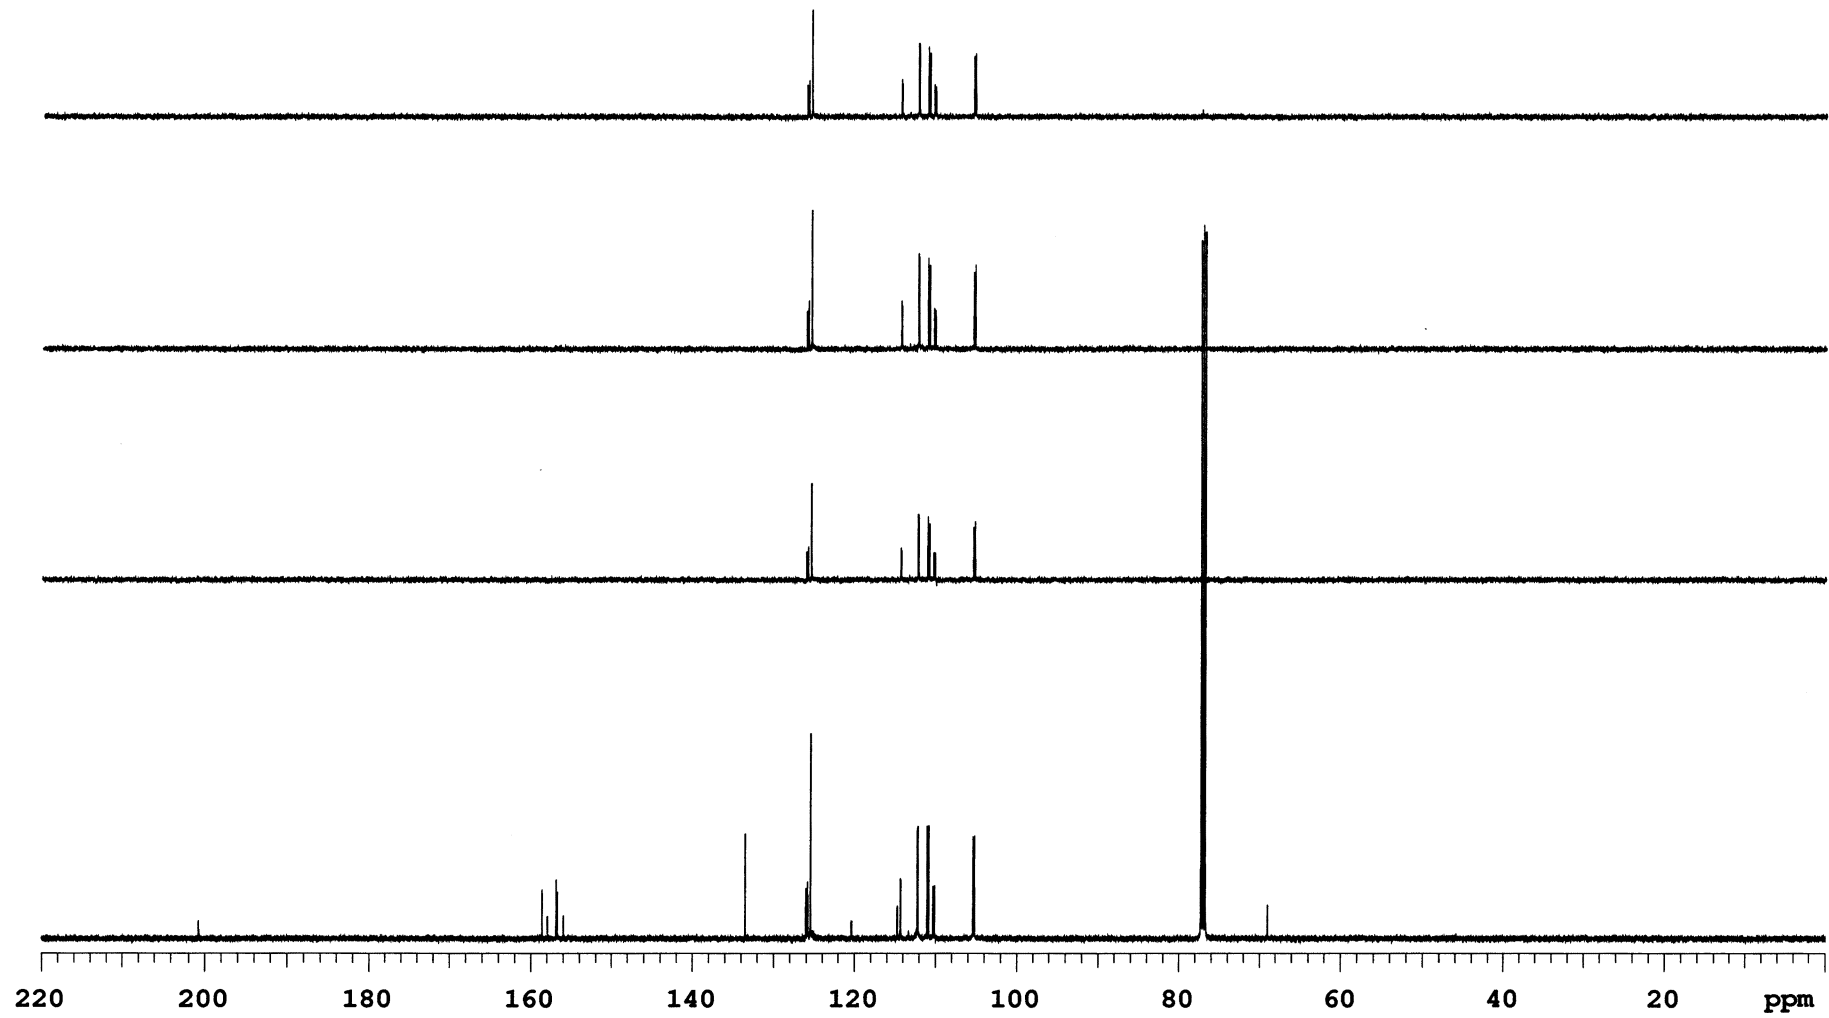

DEPT of 1b

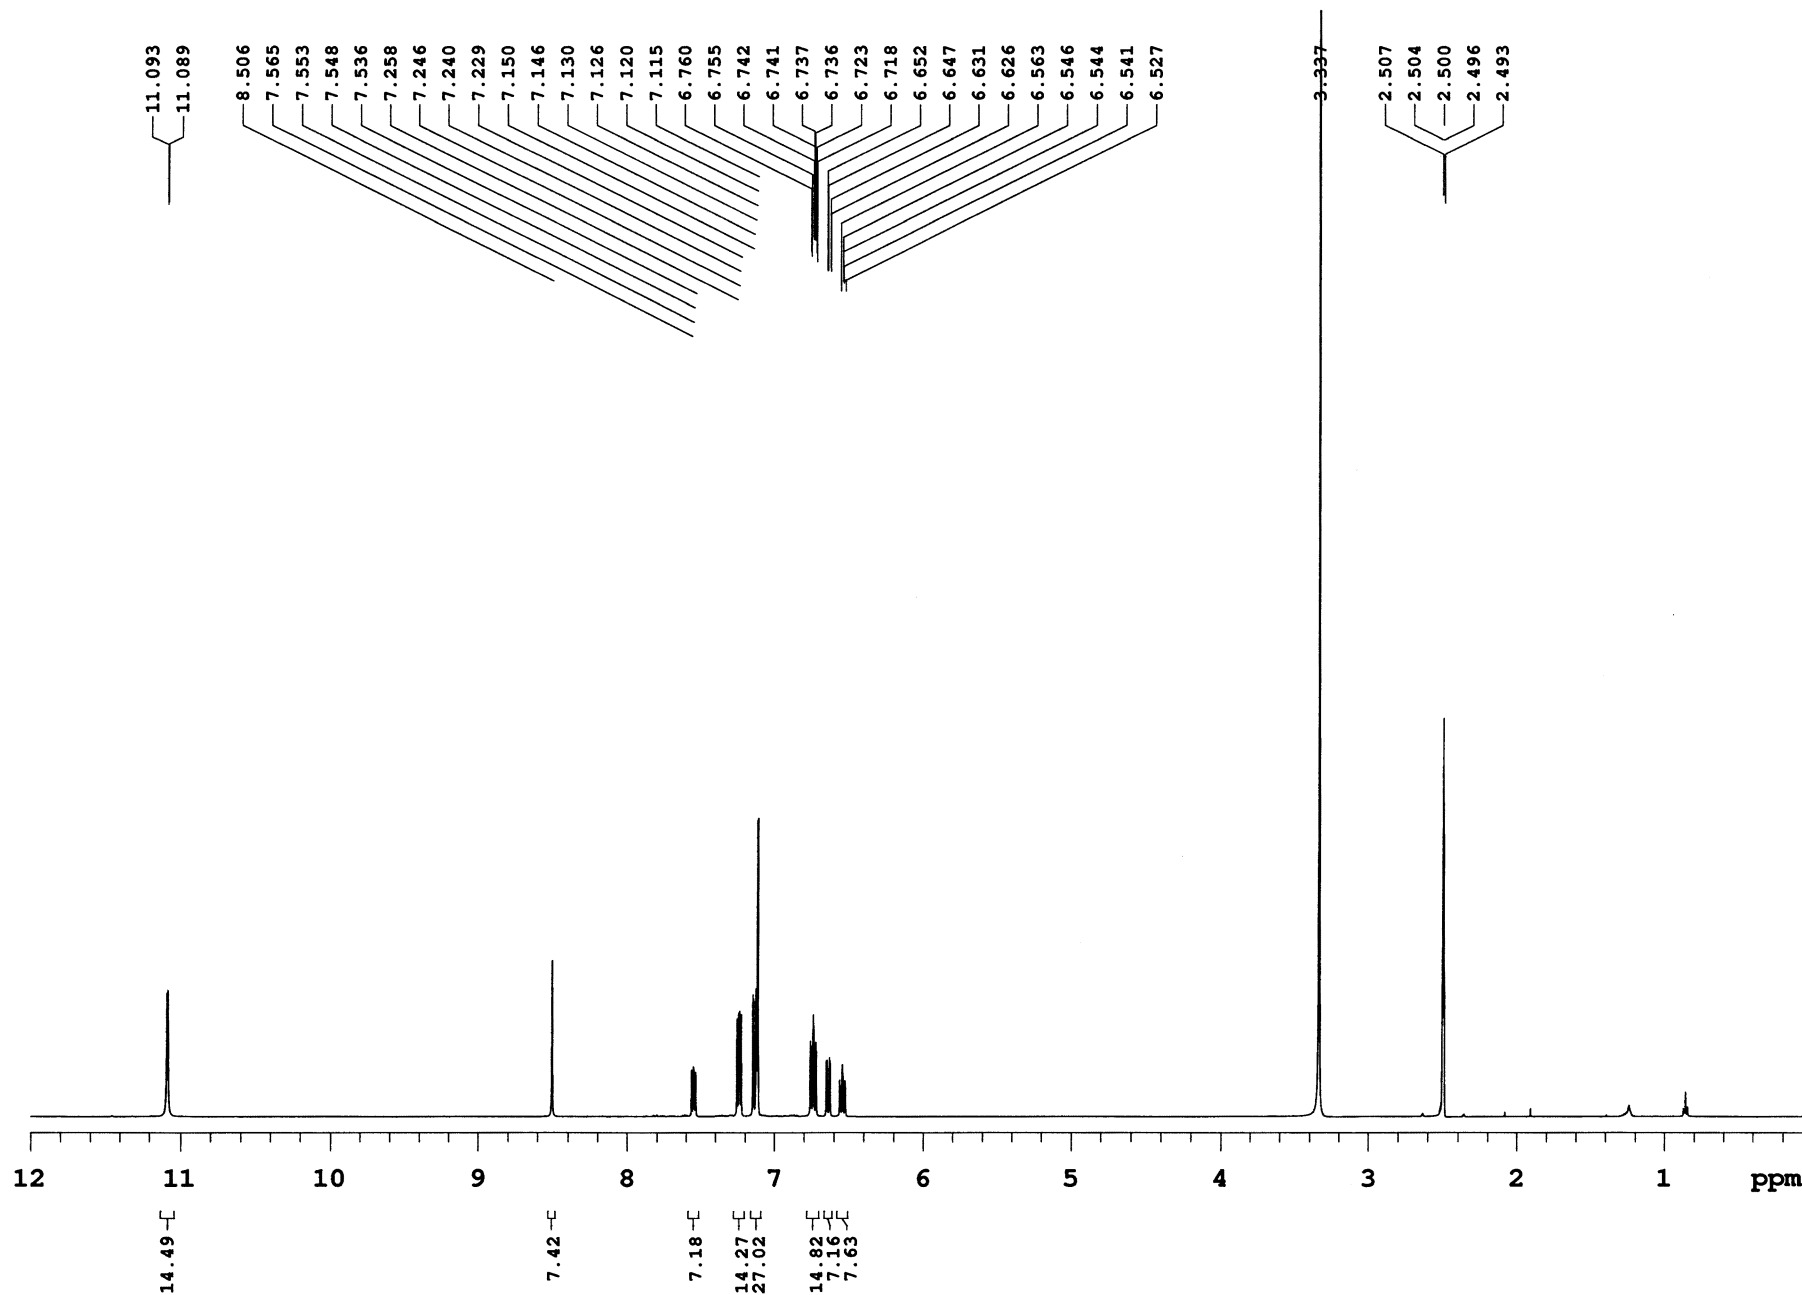

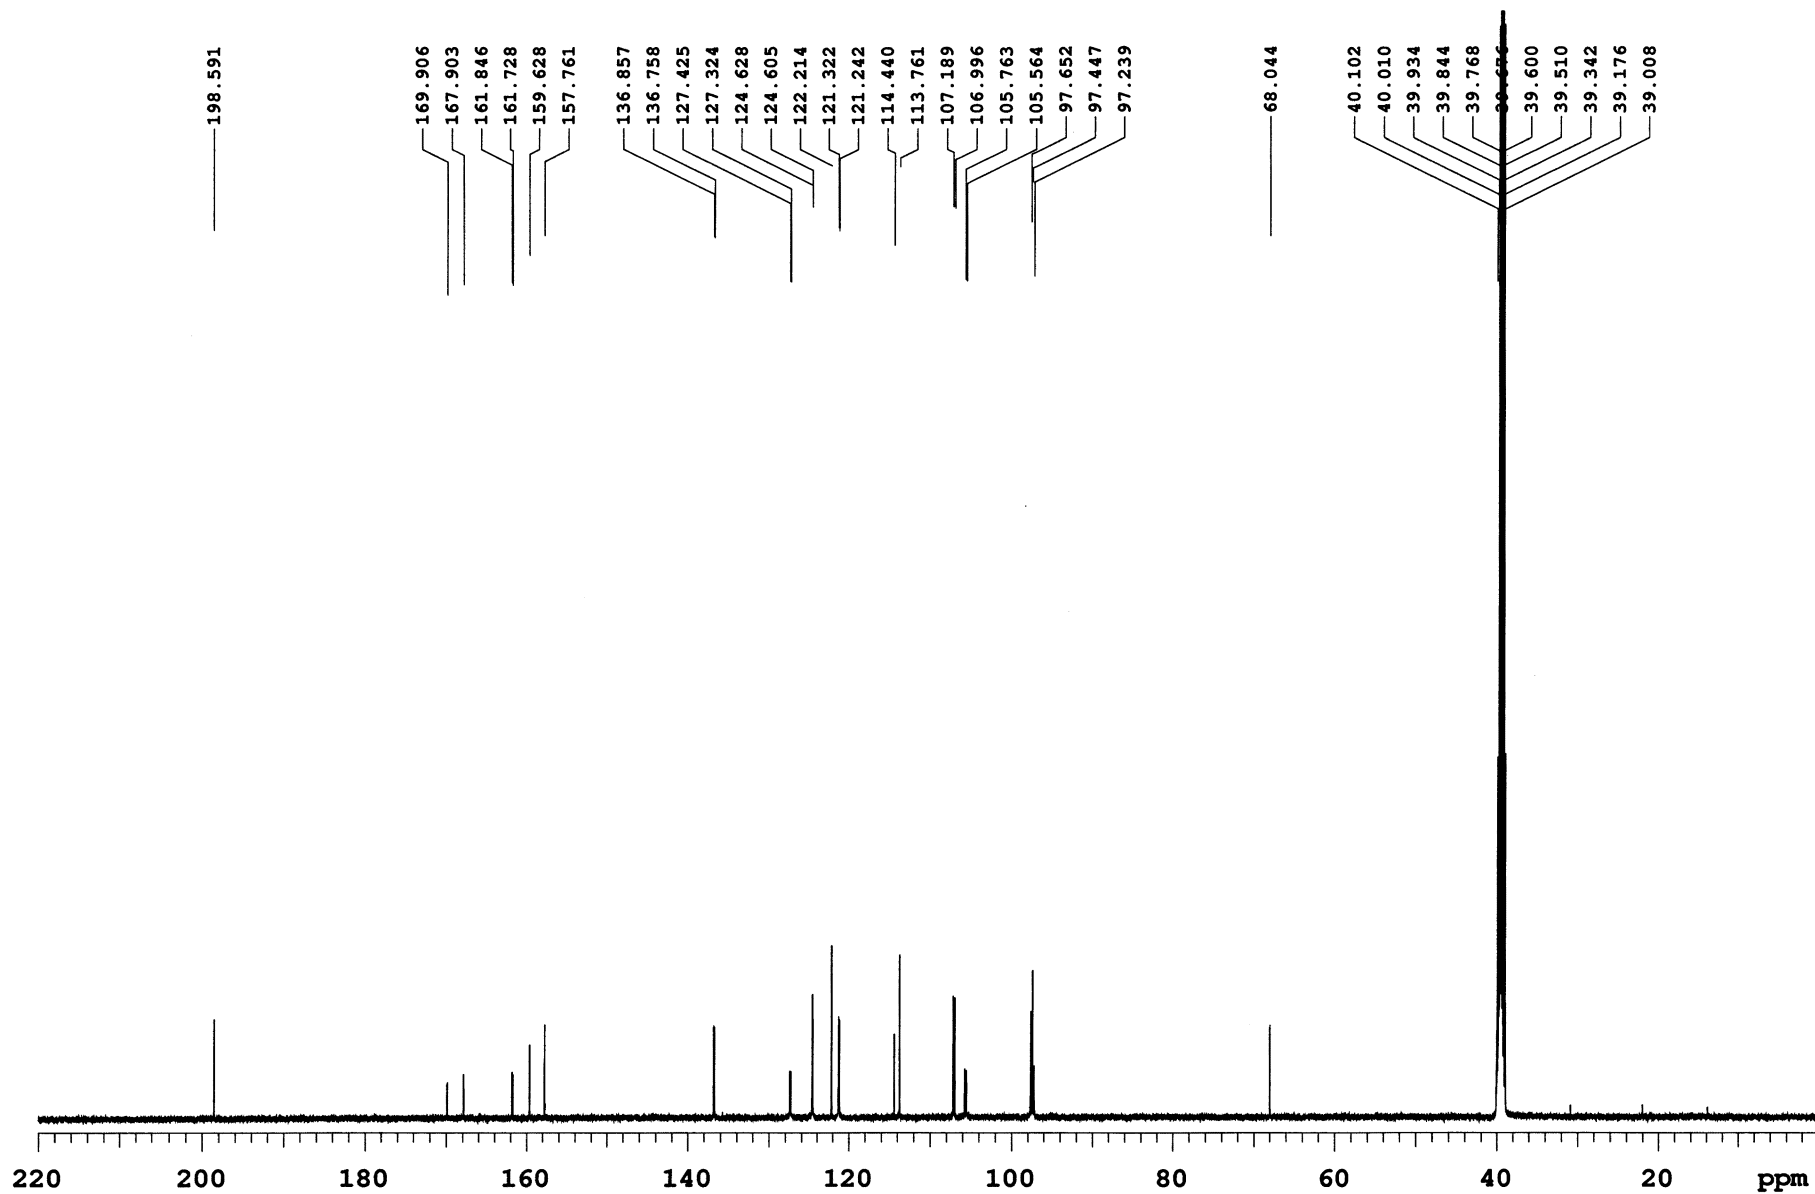

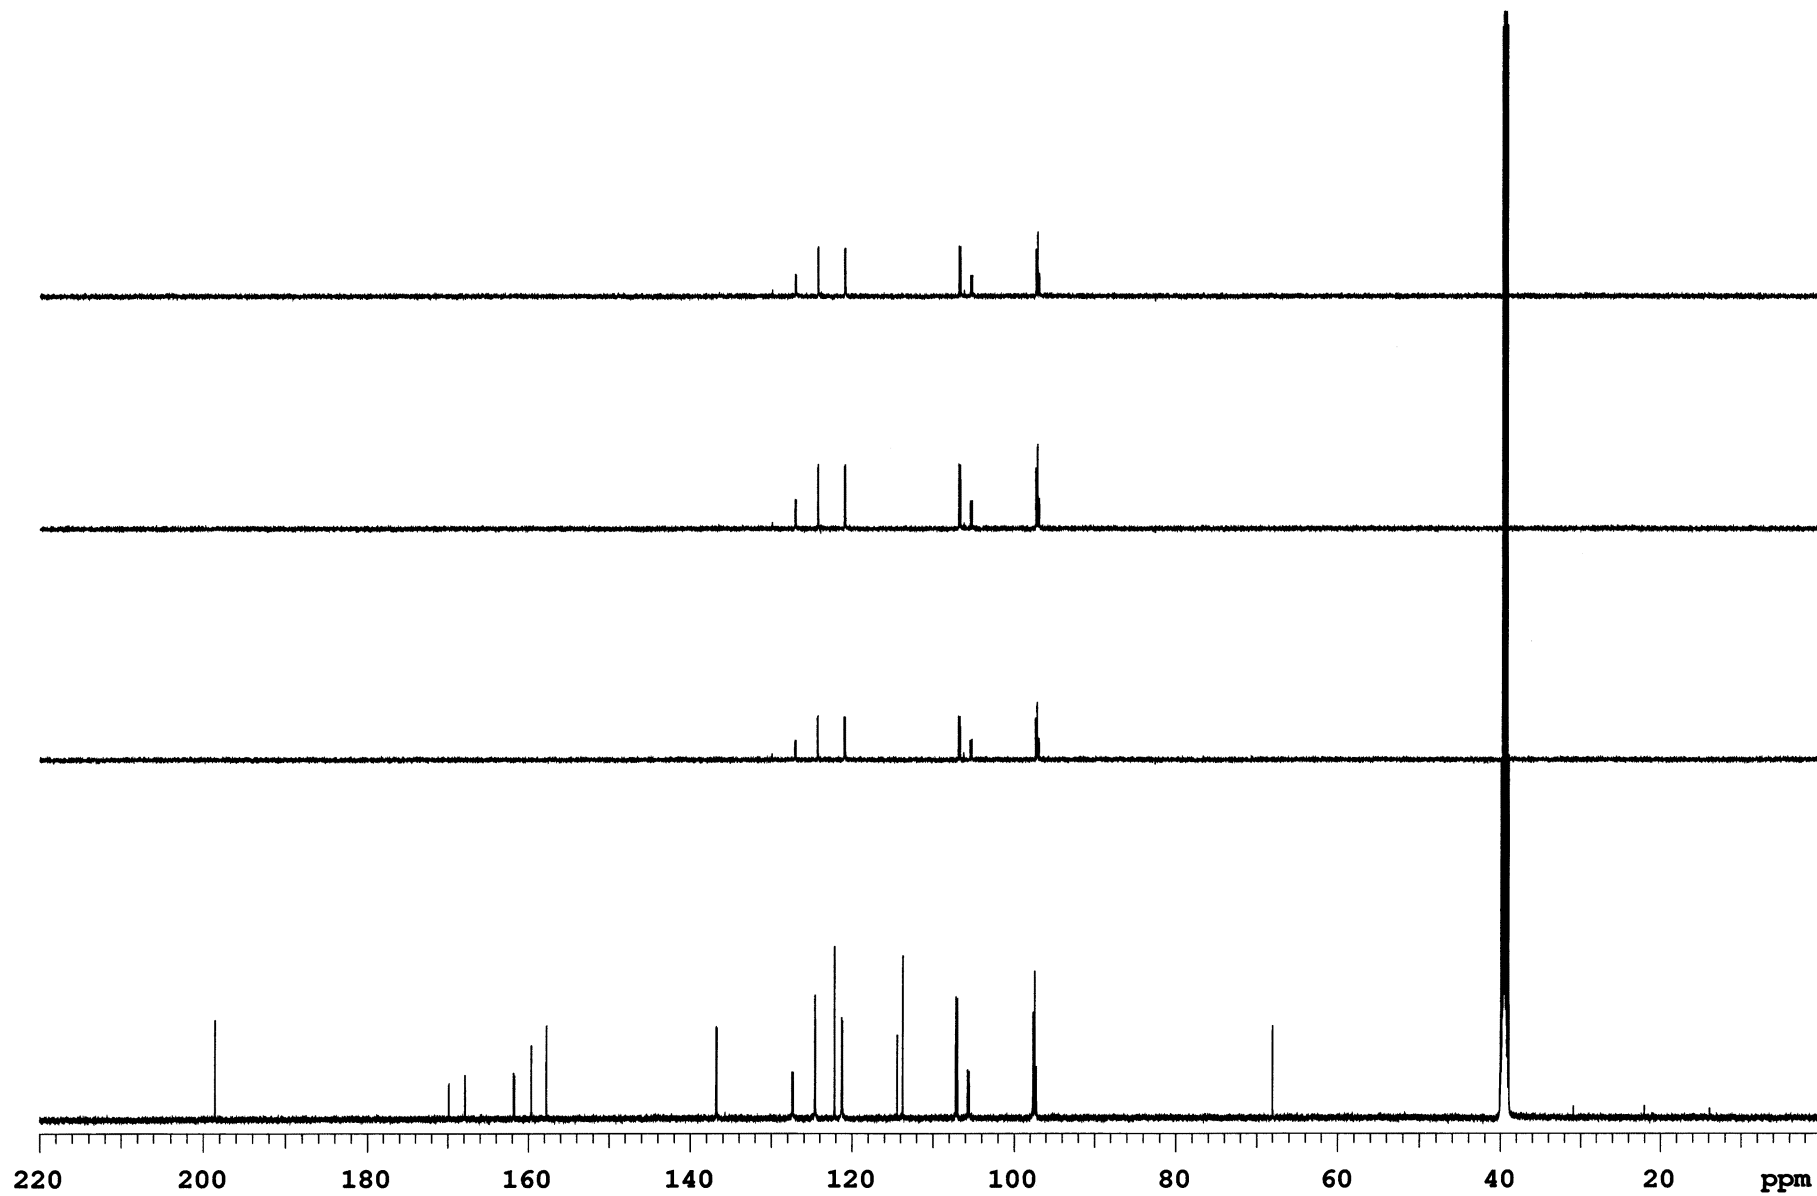

DEPT of 1c

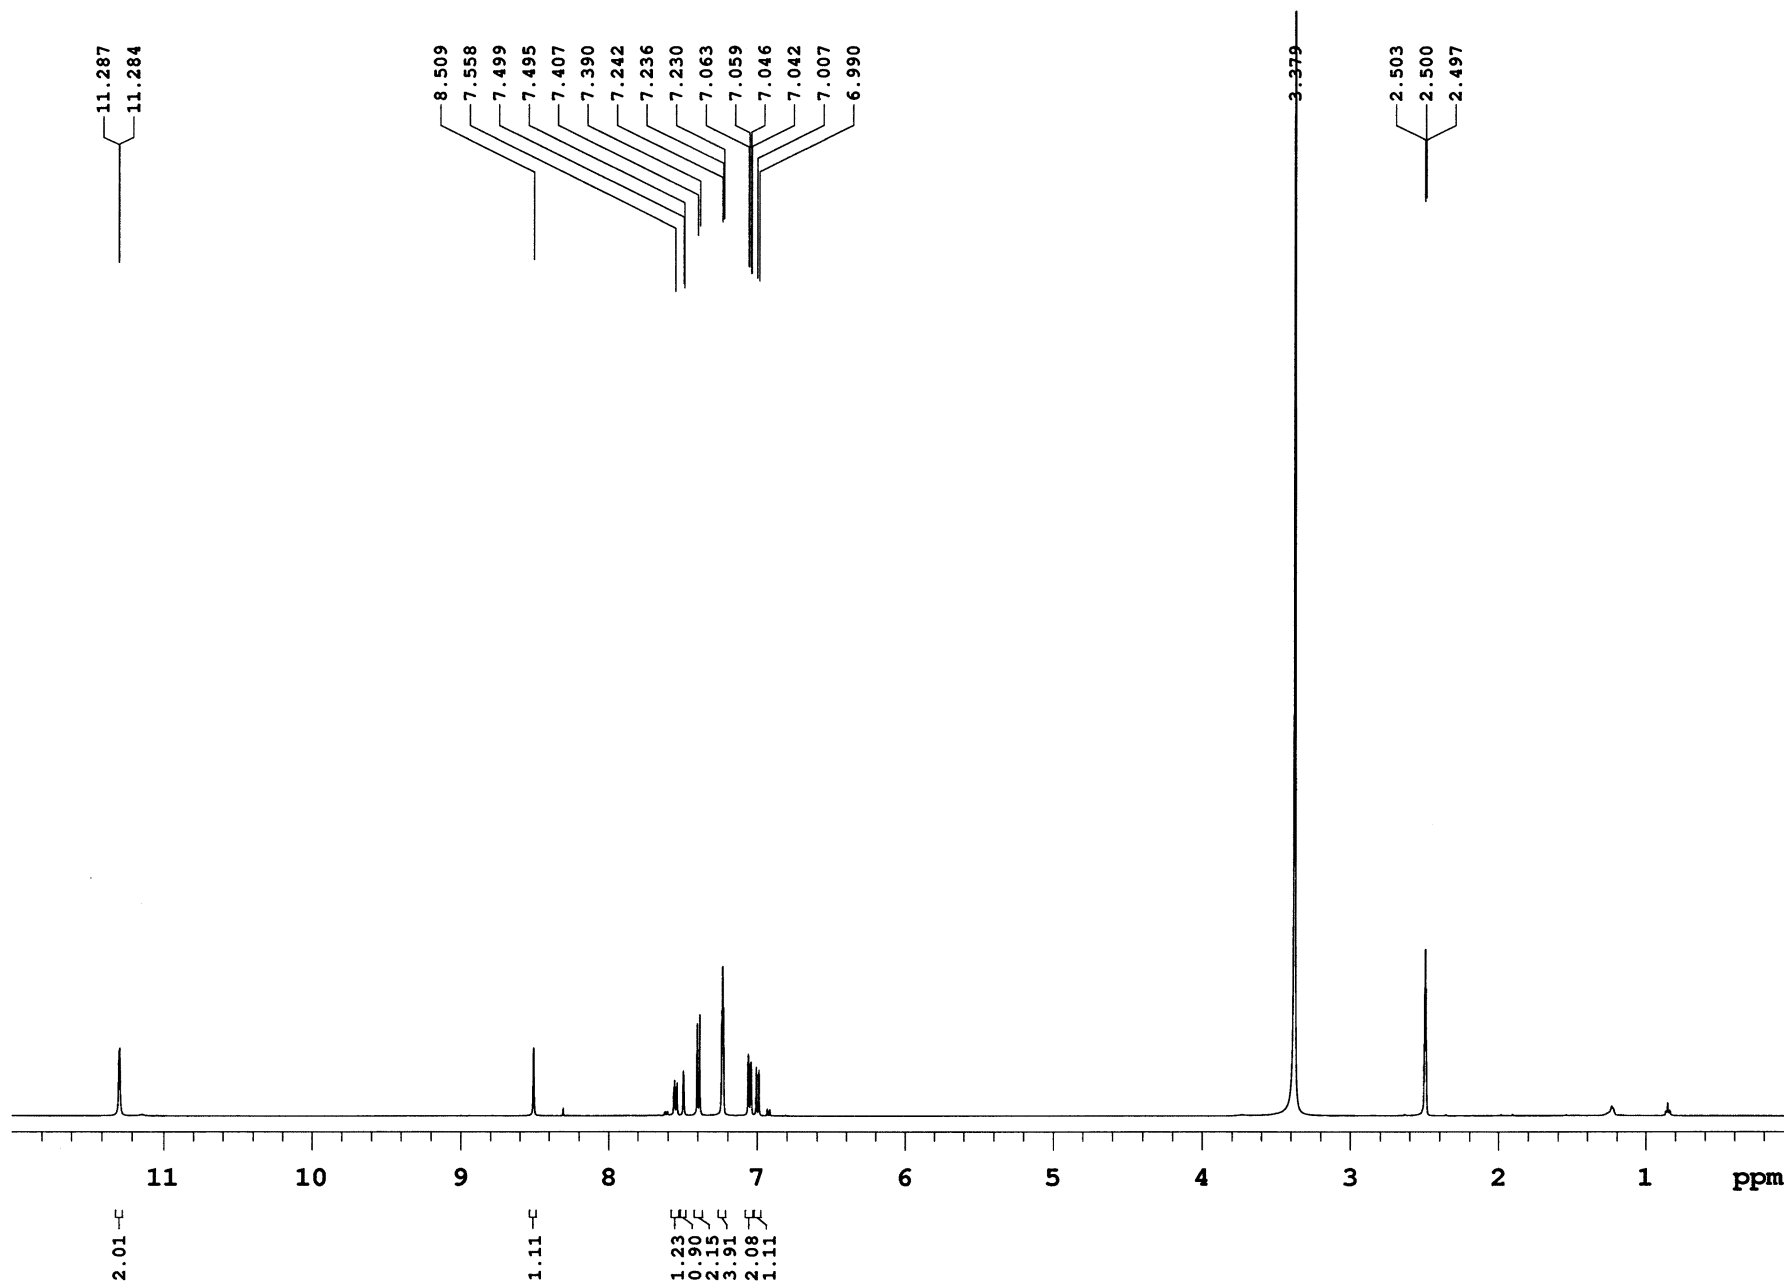1H NMR (DMSO-d6, 500 MHz) of **1d**

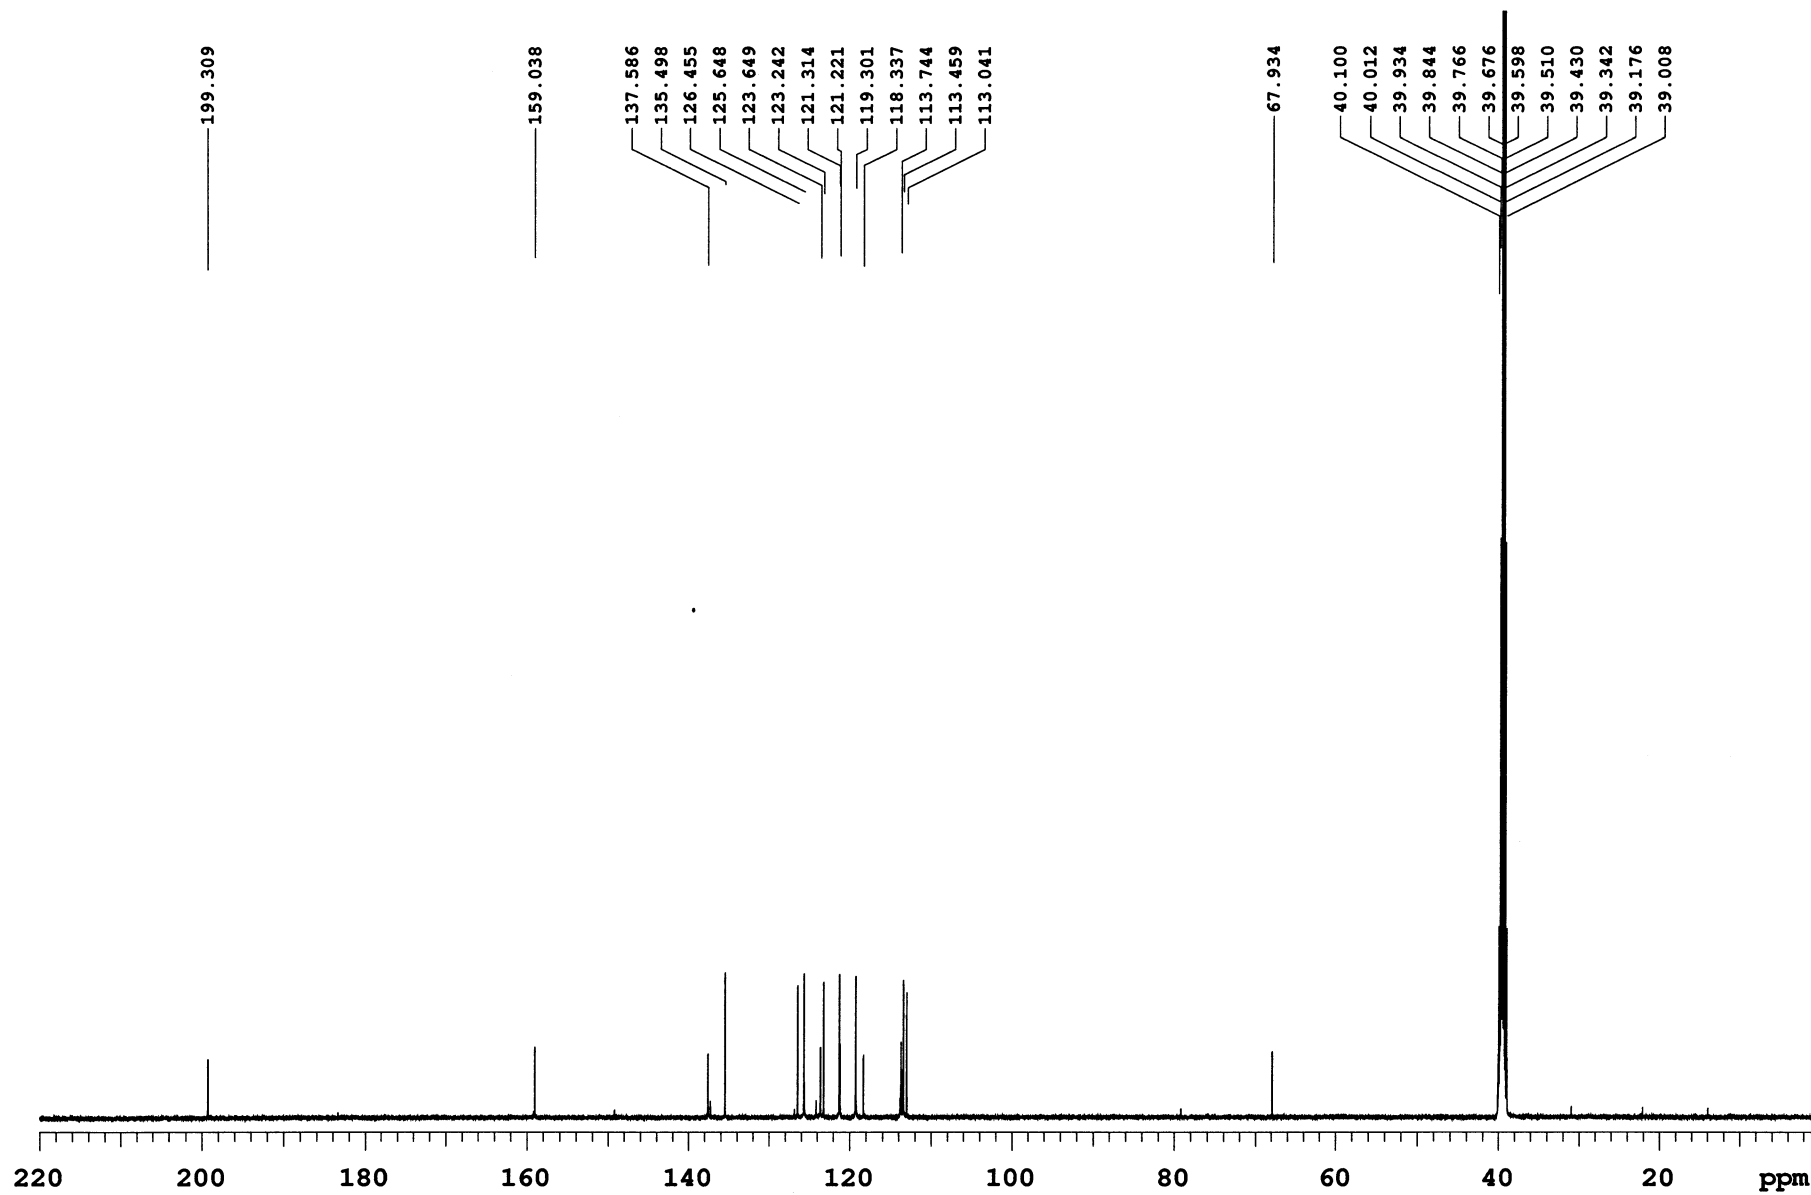

13C NMR (DMSO-d6, 125 MHz) of 1d

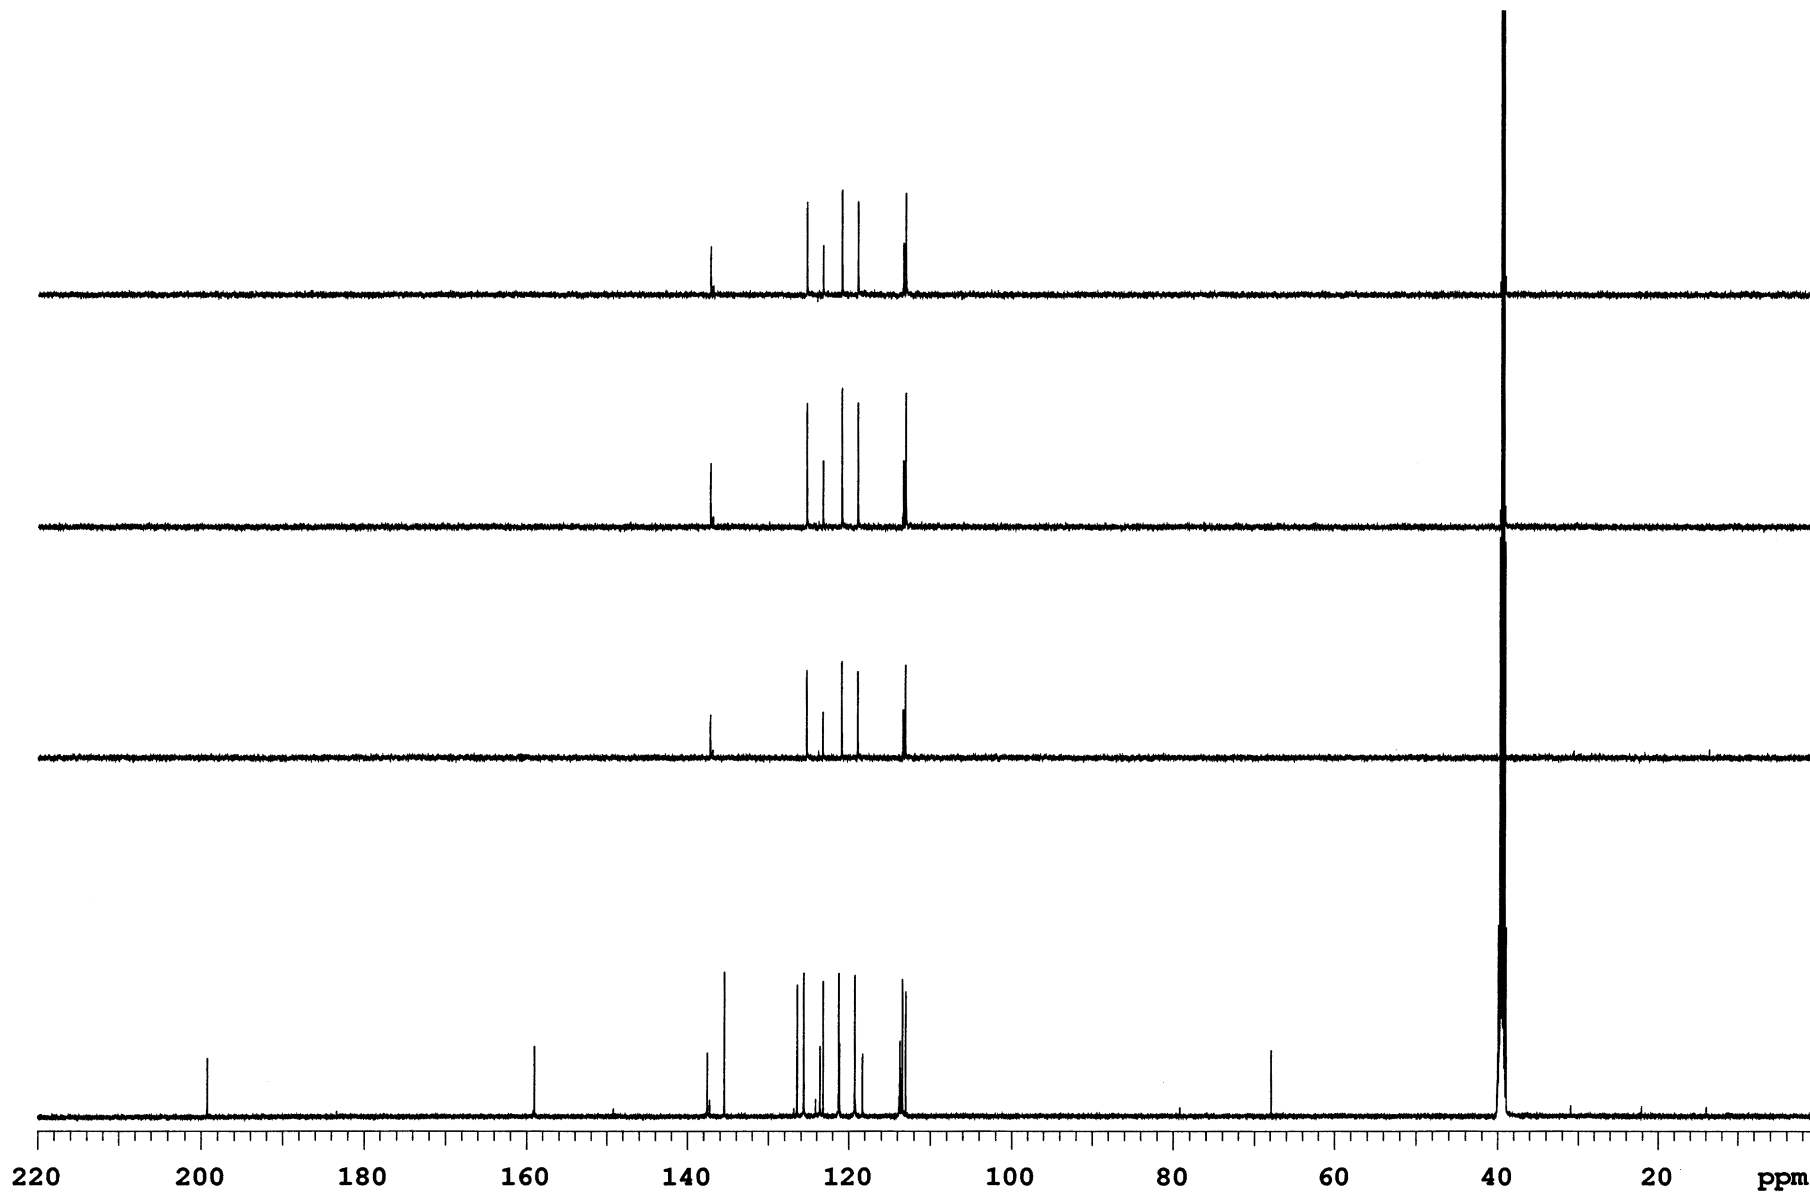

DEPT of 1d

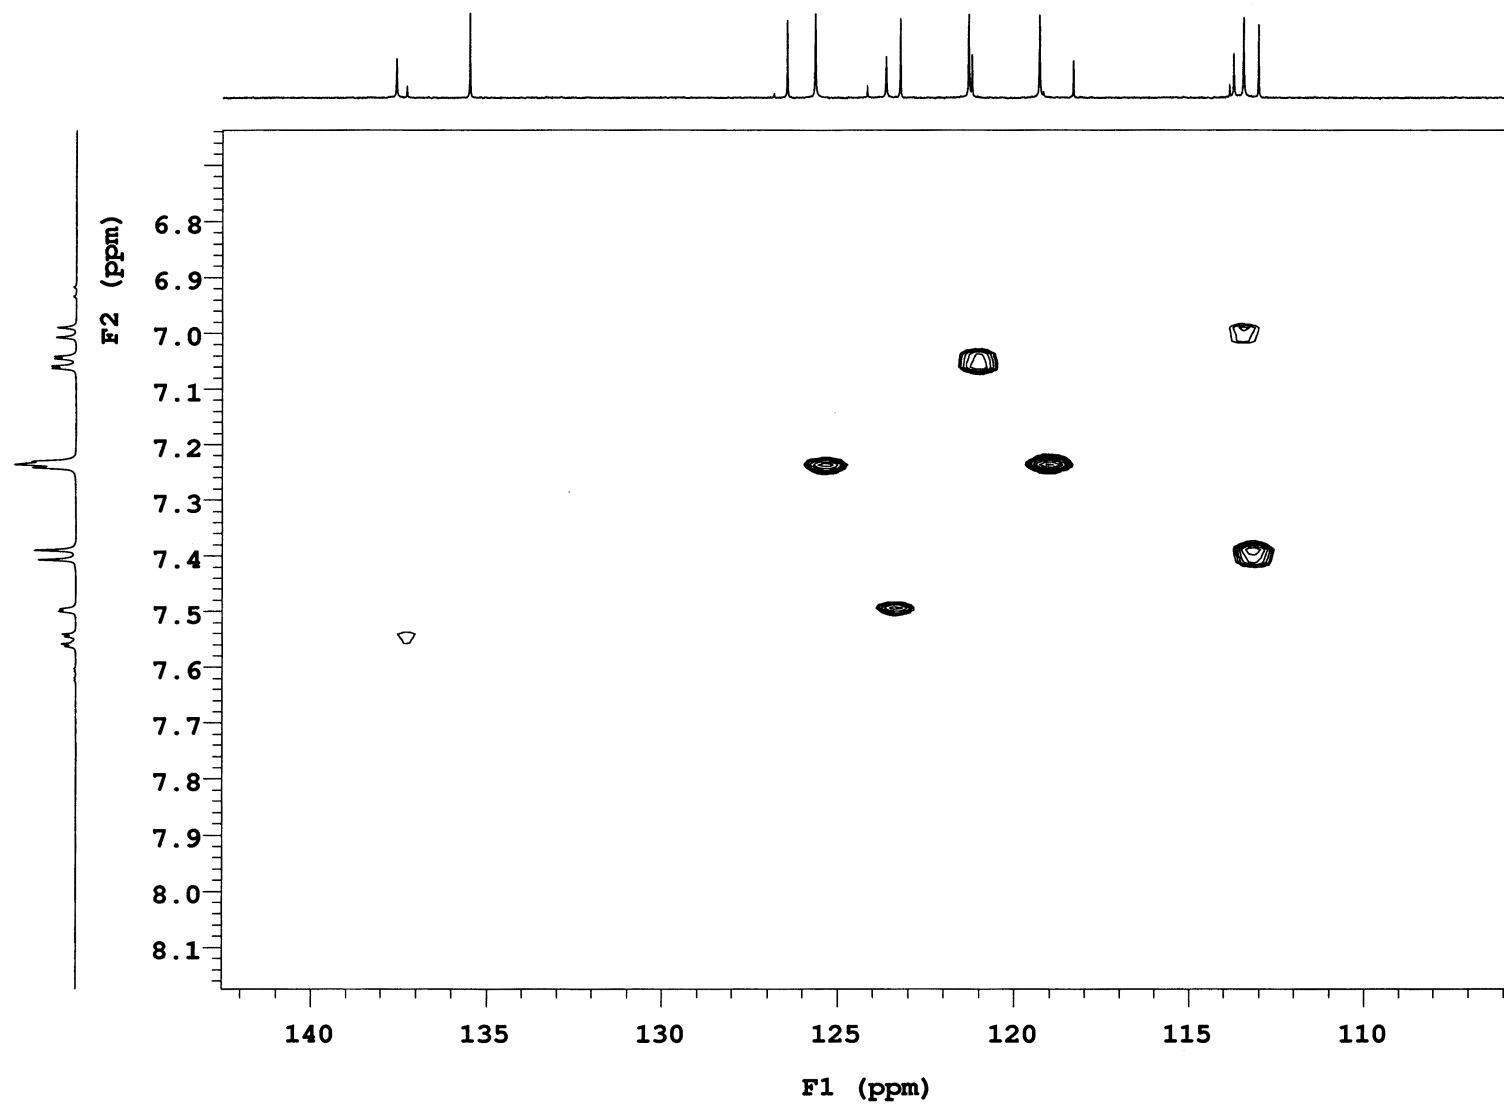



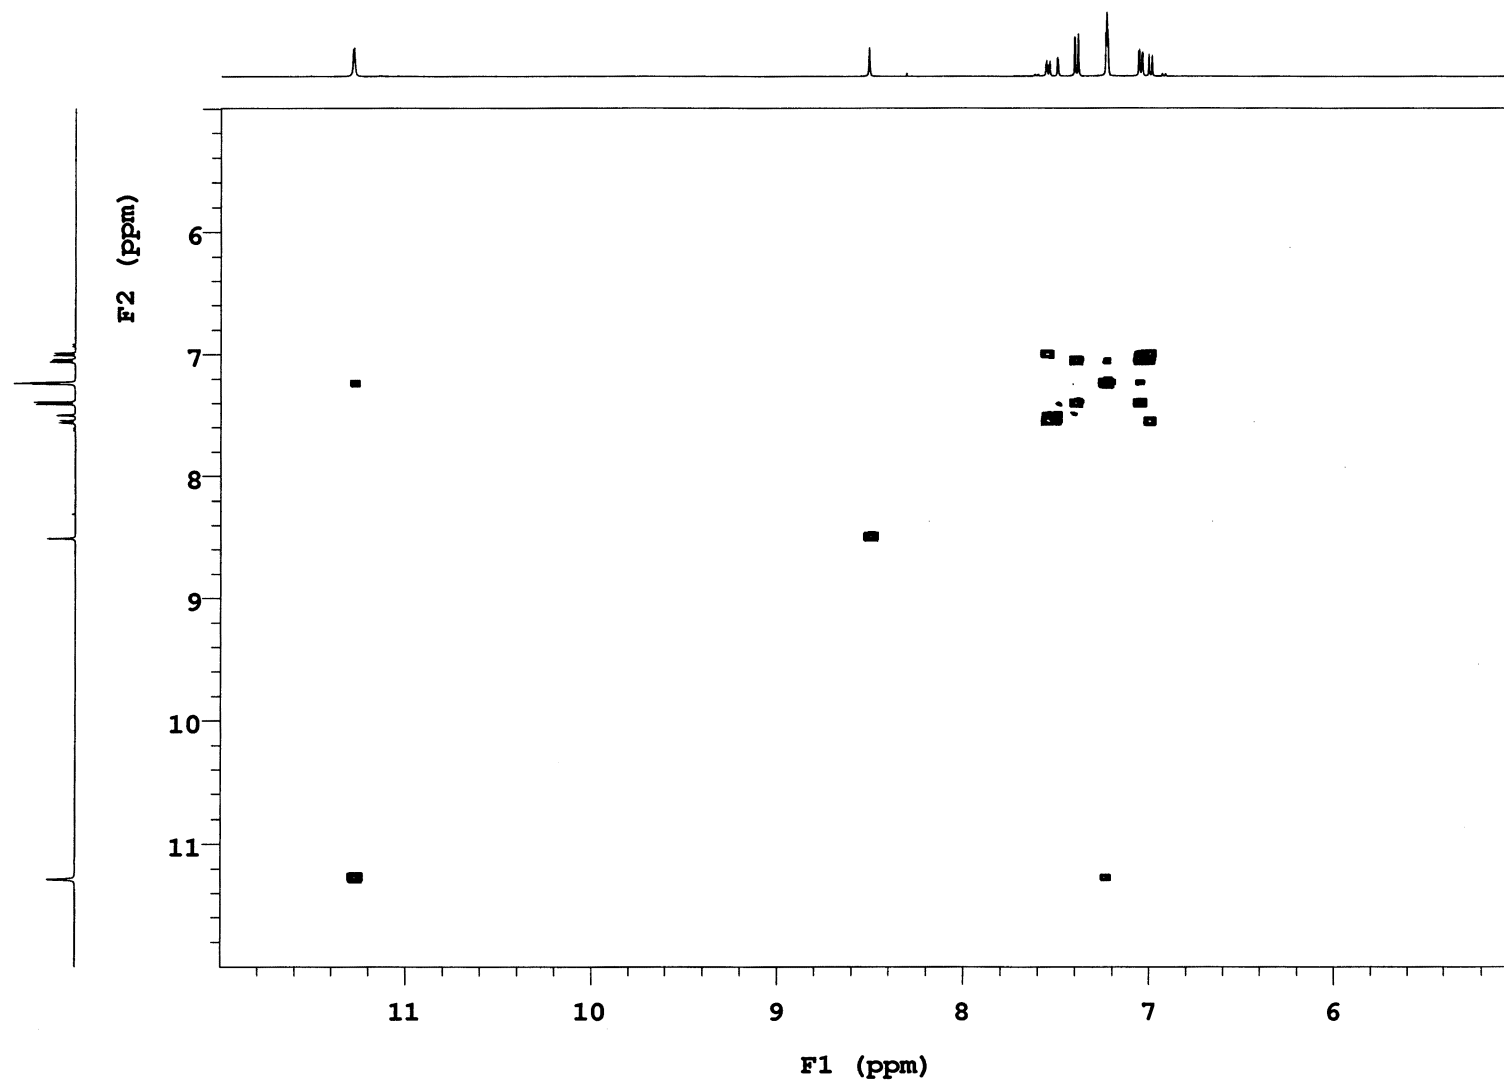

COSY of 1d

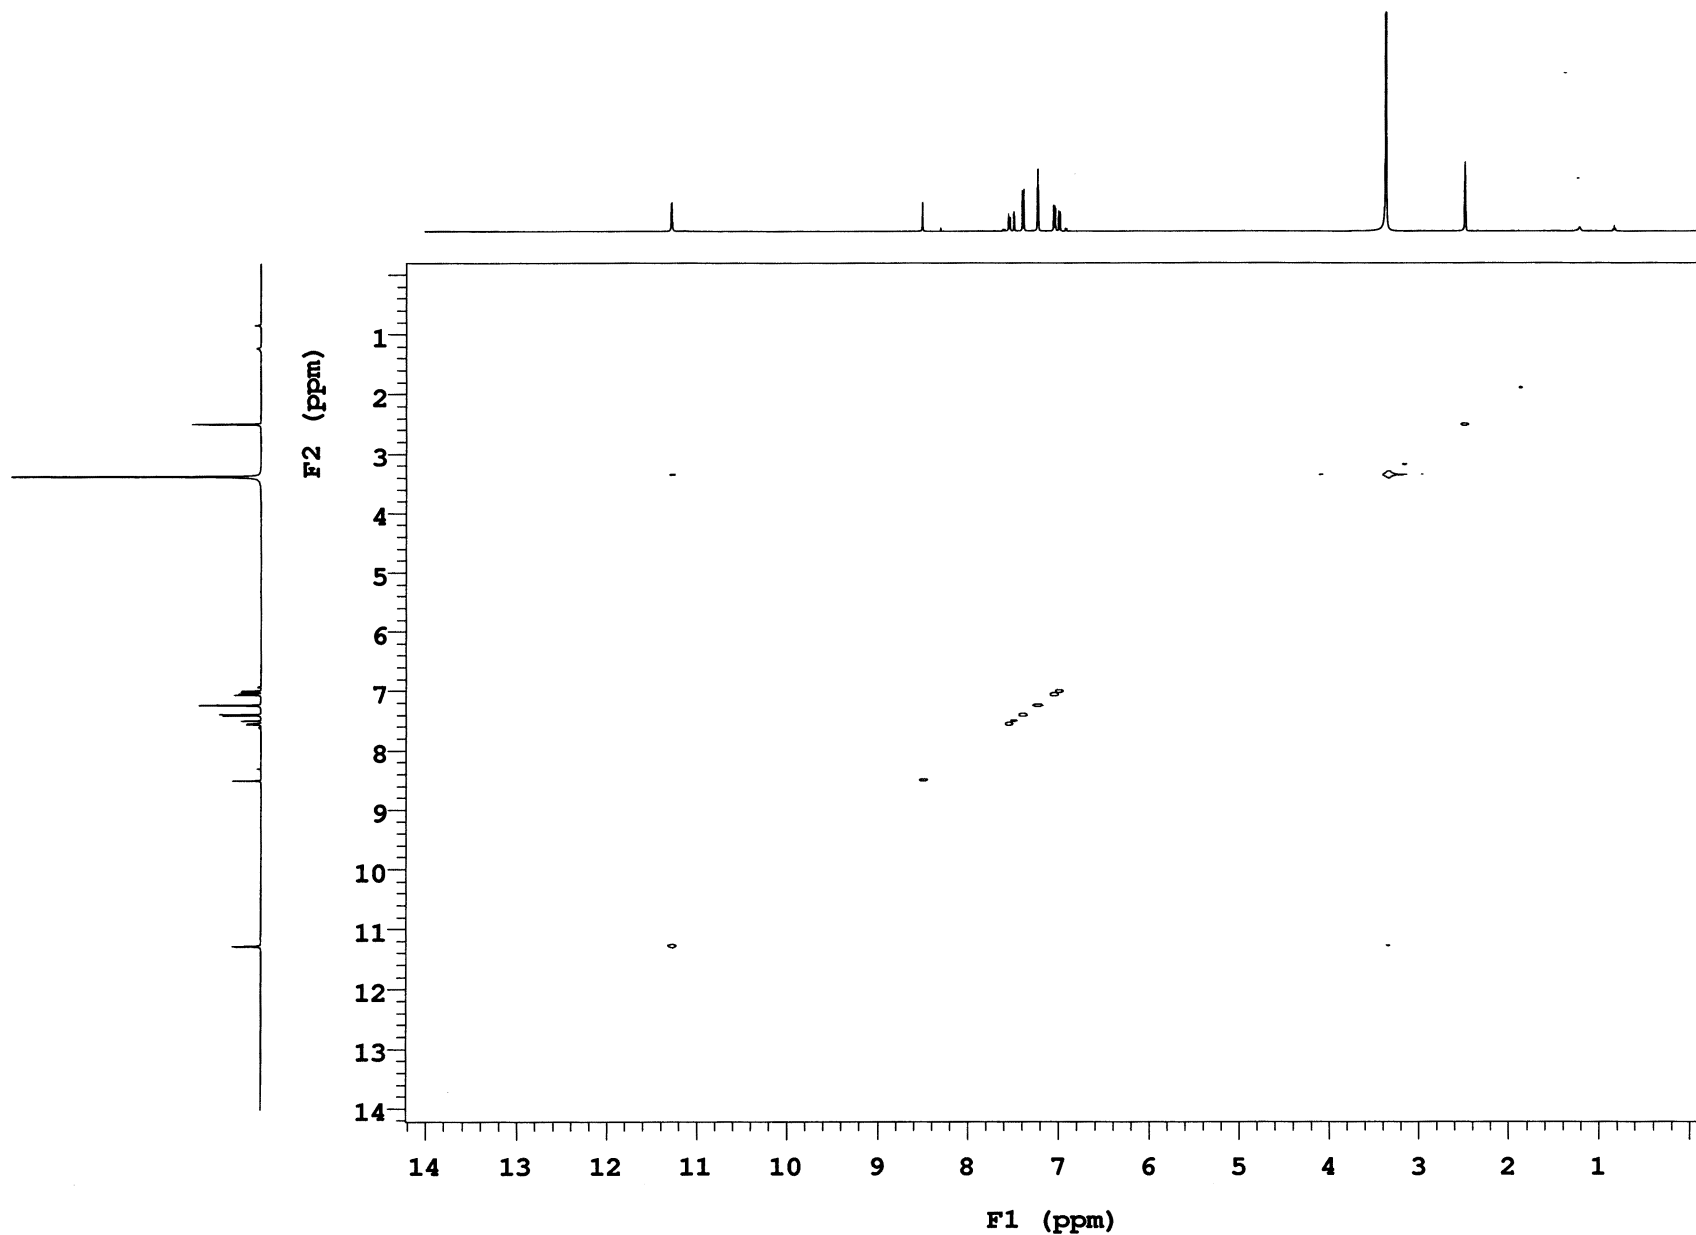

NOESY of 1d

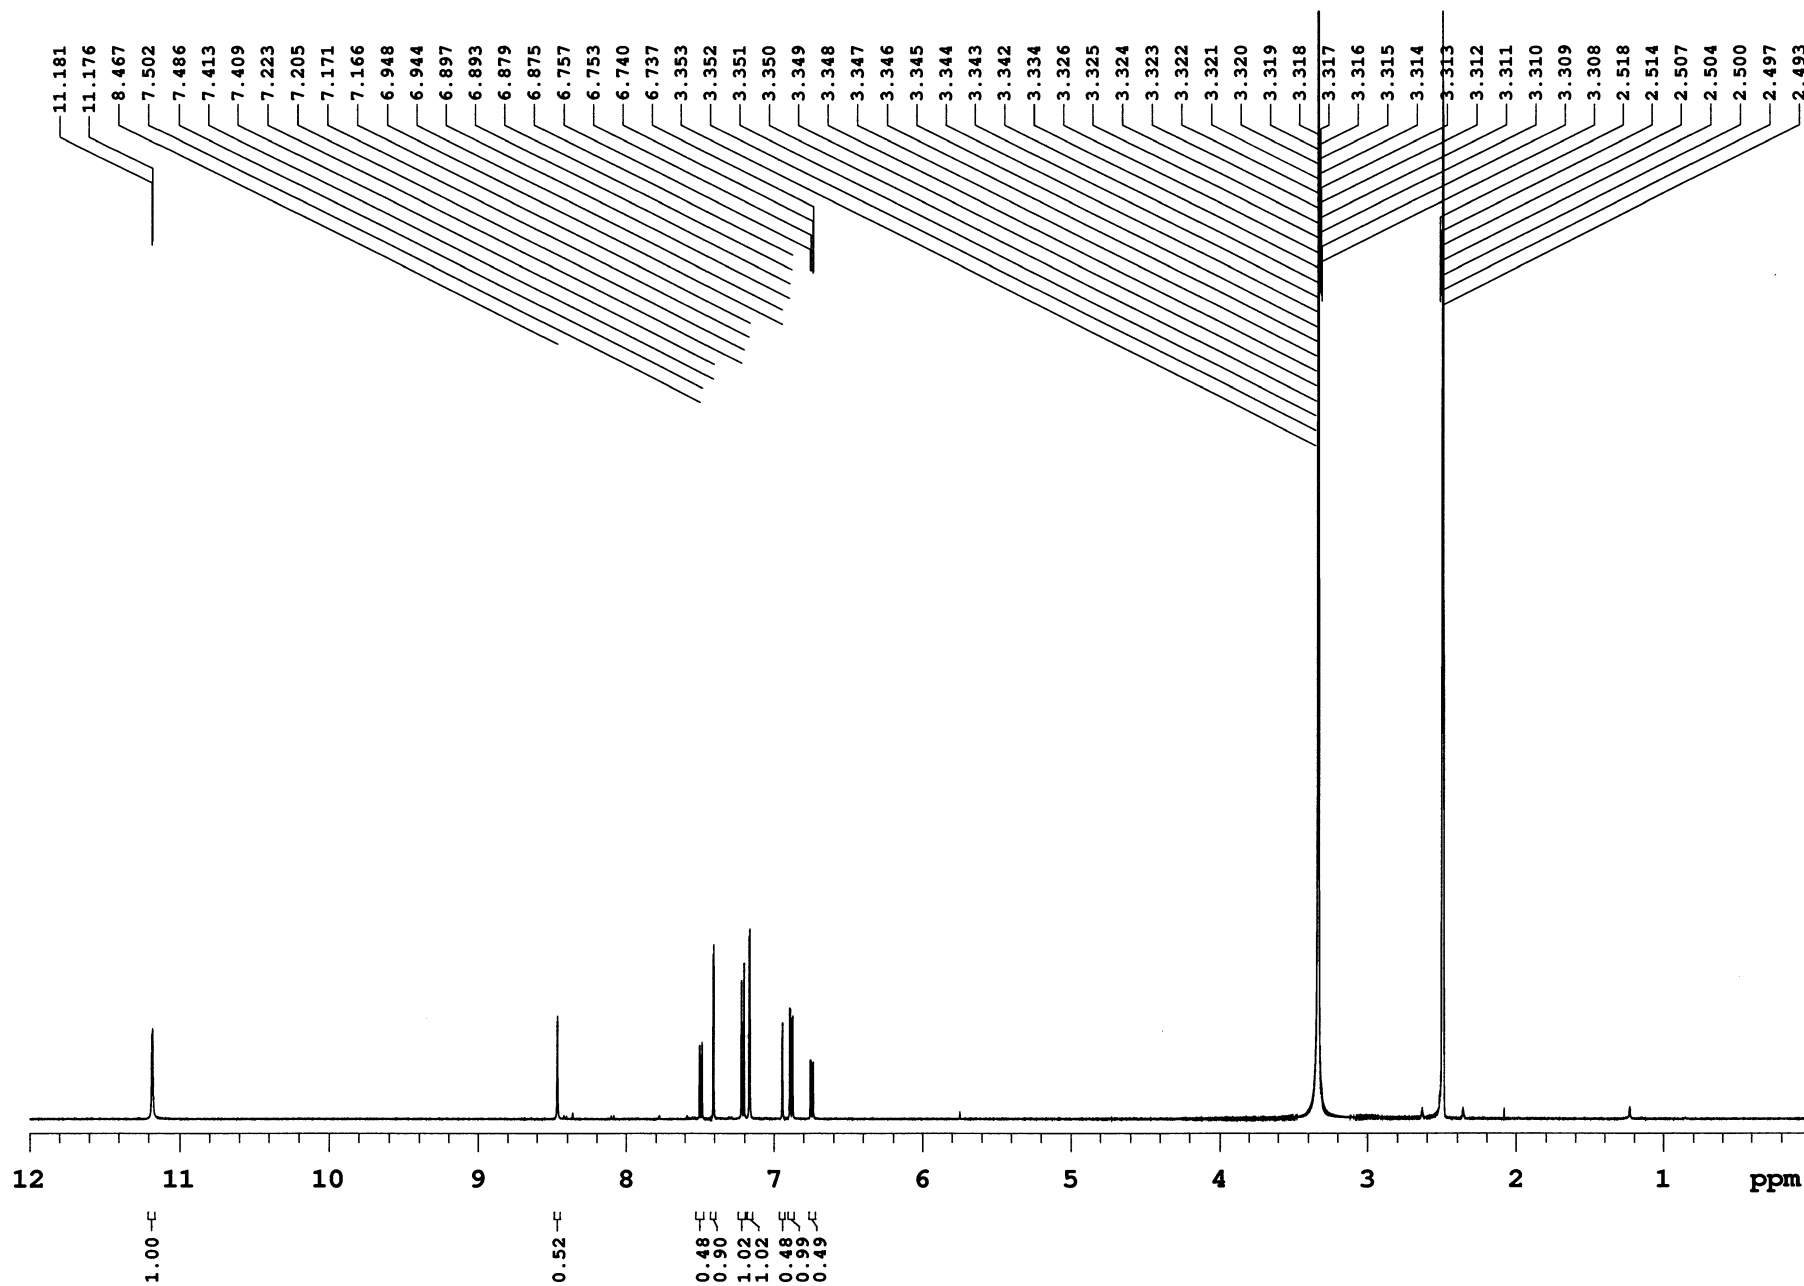

1H NMR (DMSO-d6, 500 MHz) of 1e

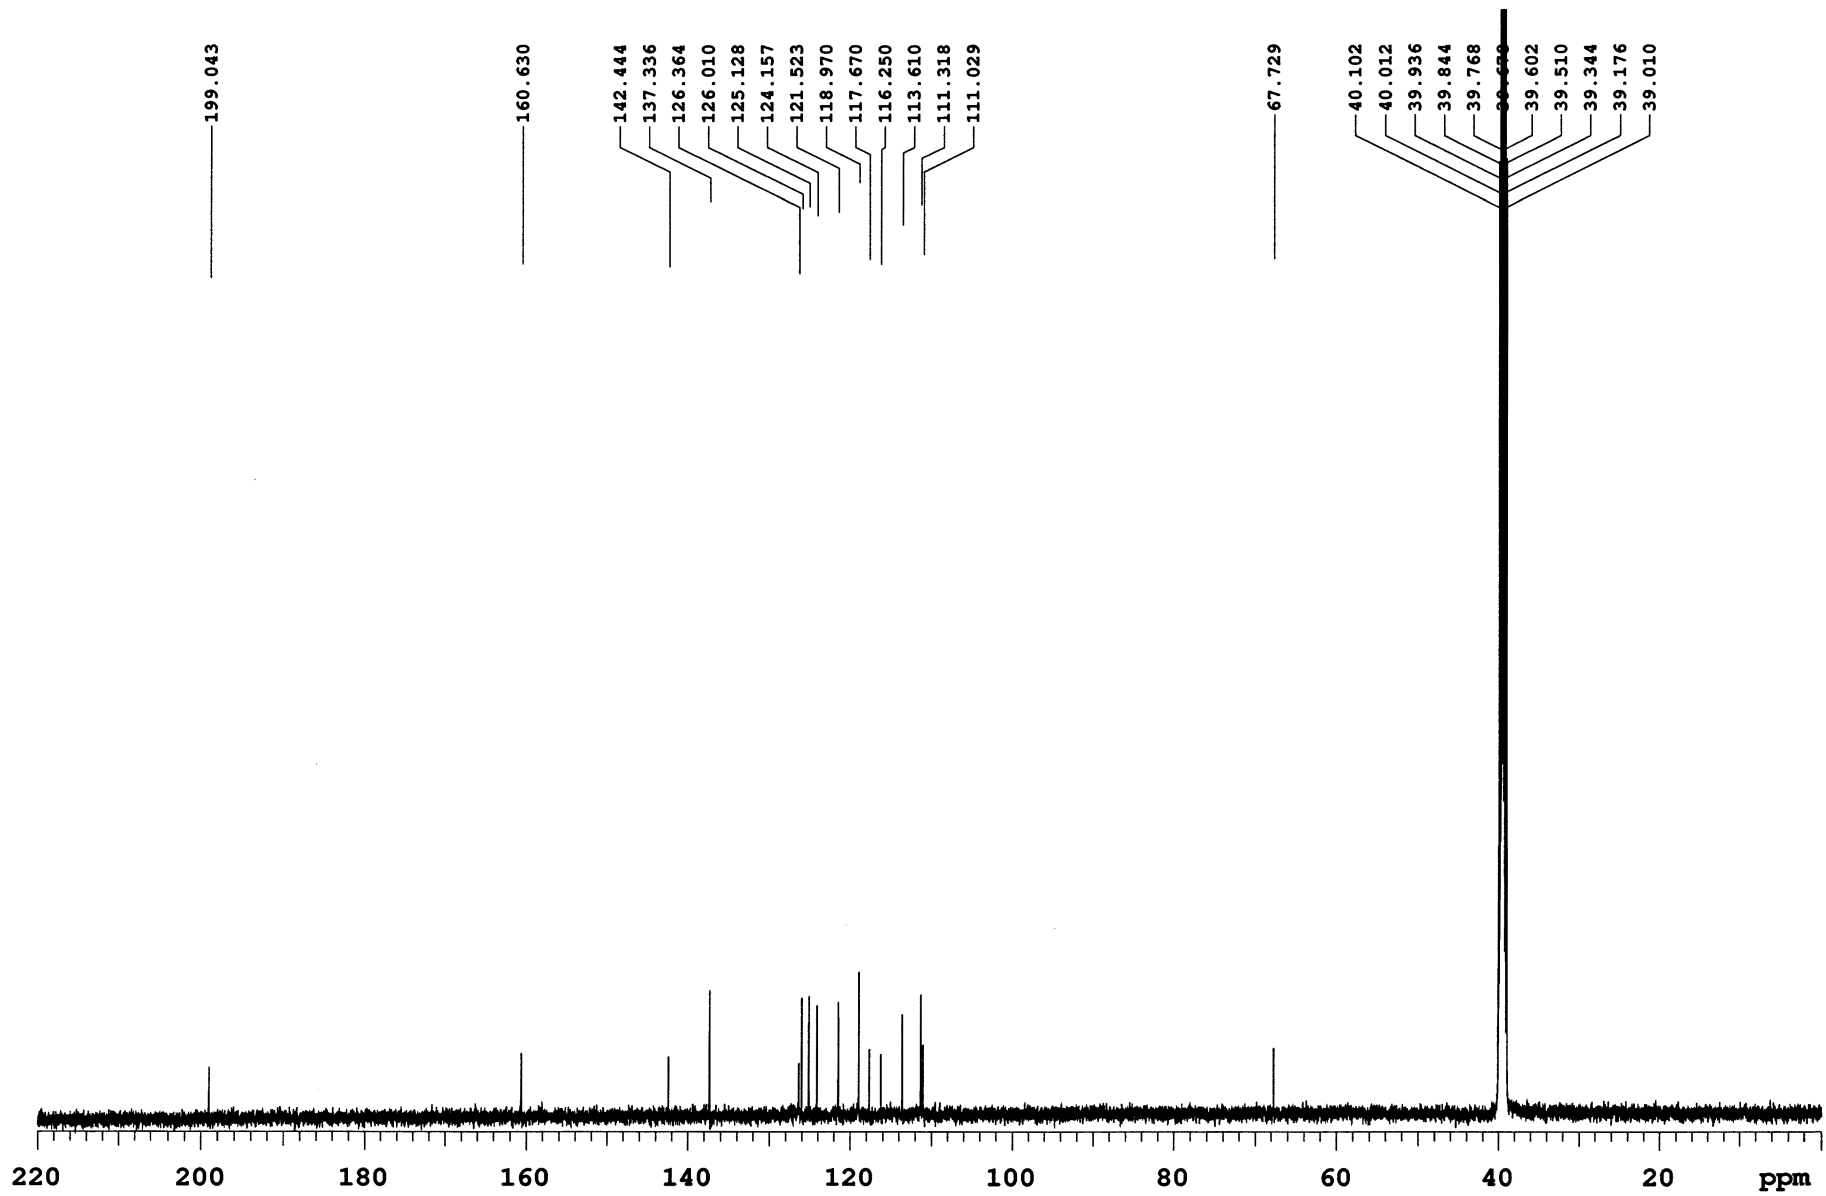

13C NMR (DMSO-d6, 125 MHz) of 1e

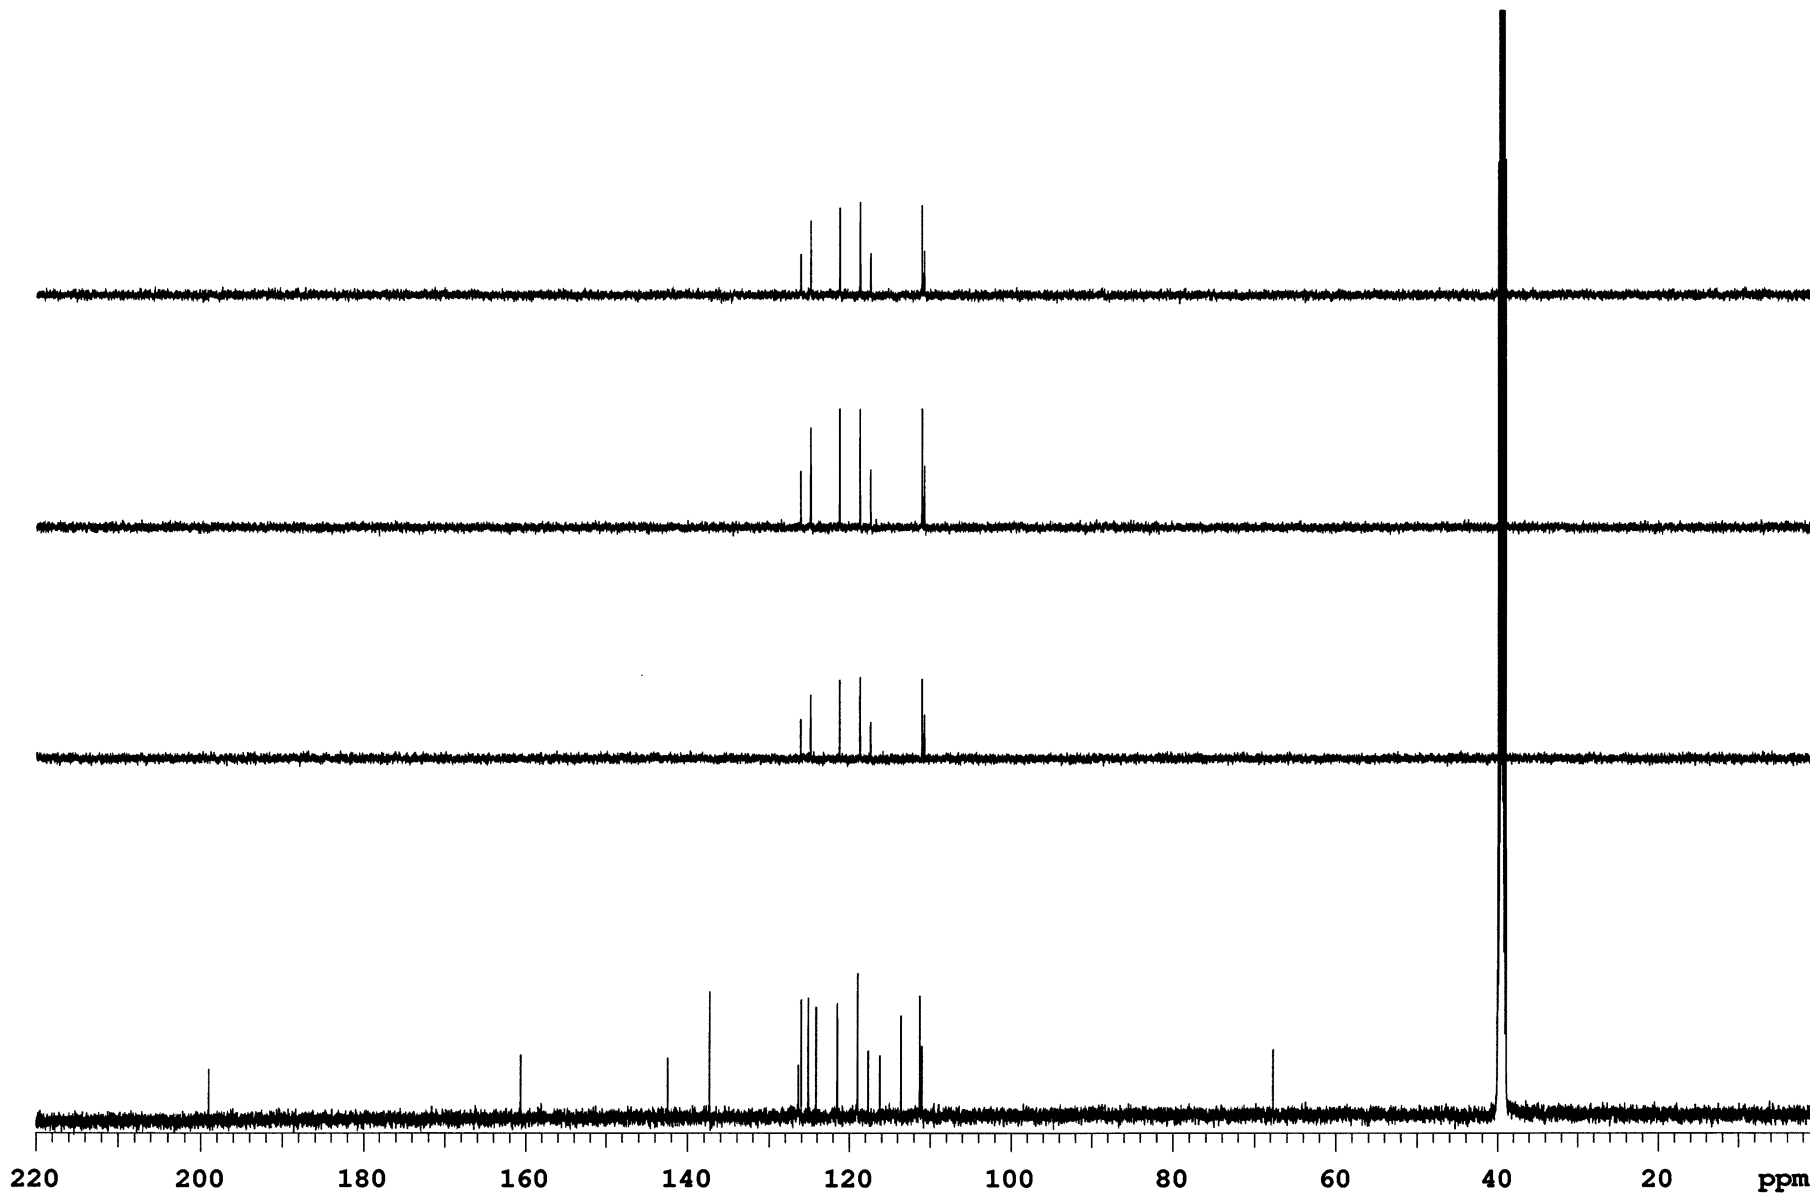

DEPT of 1e

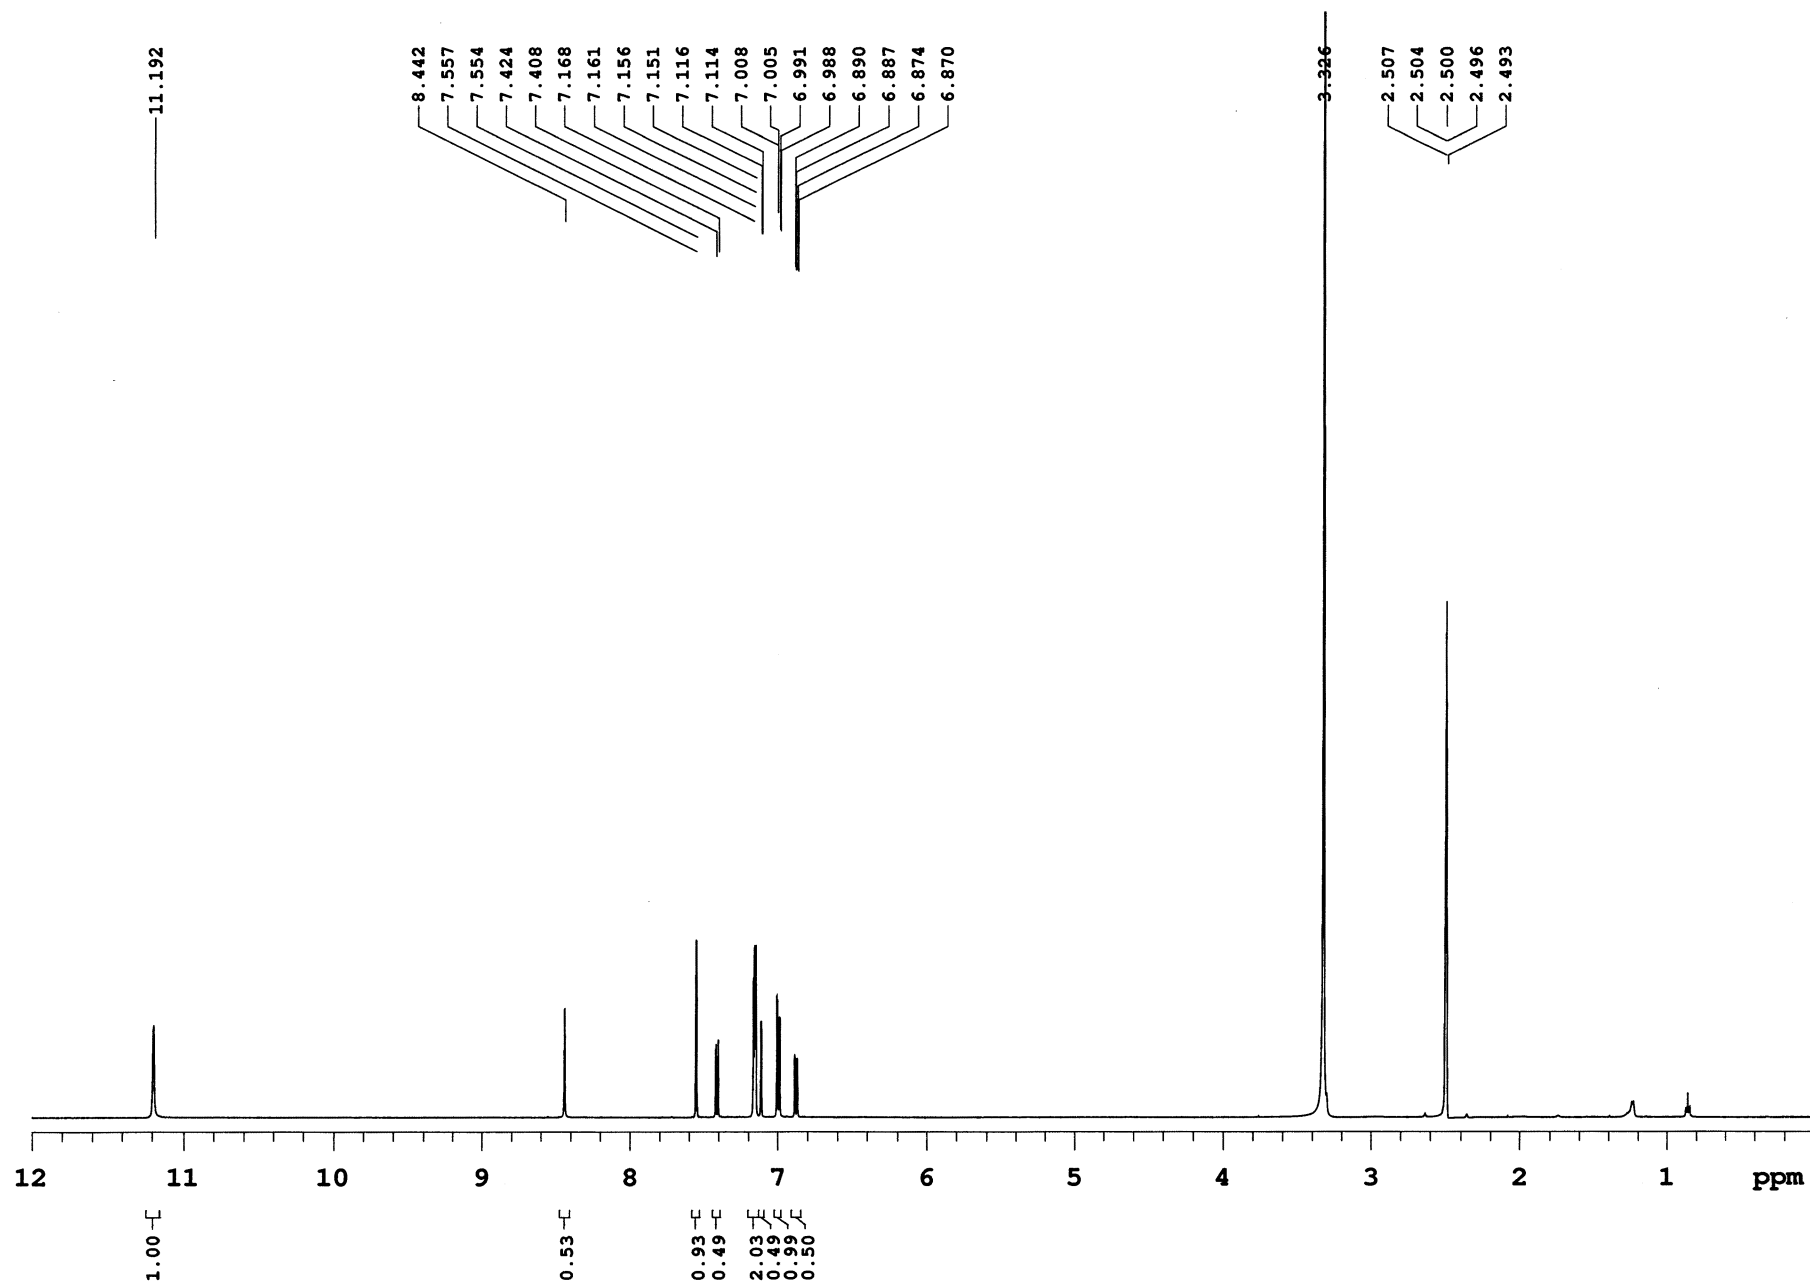

1H NMR (DMSO-d6, 500 MHz) of 1f

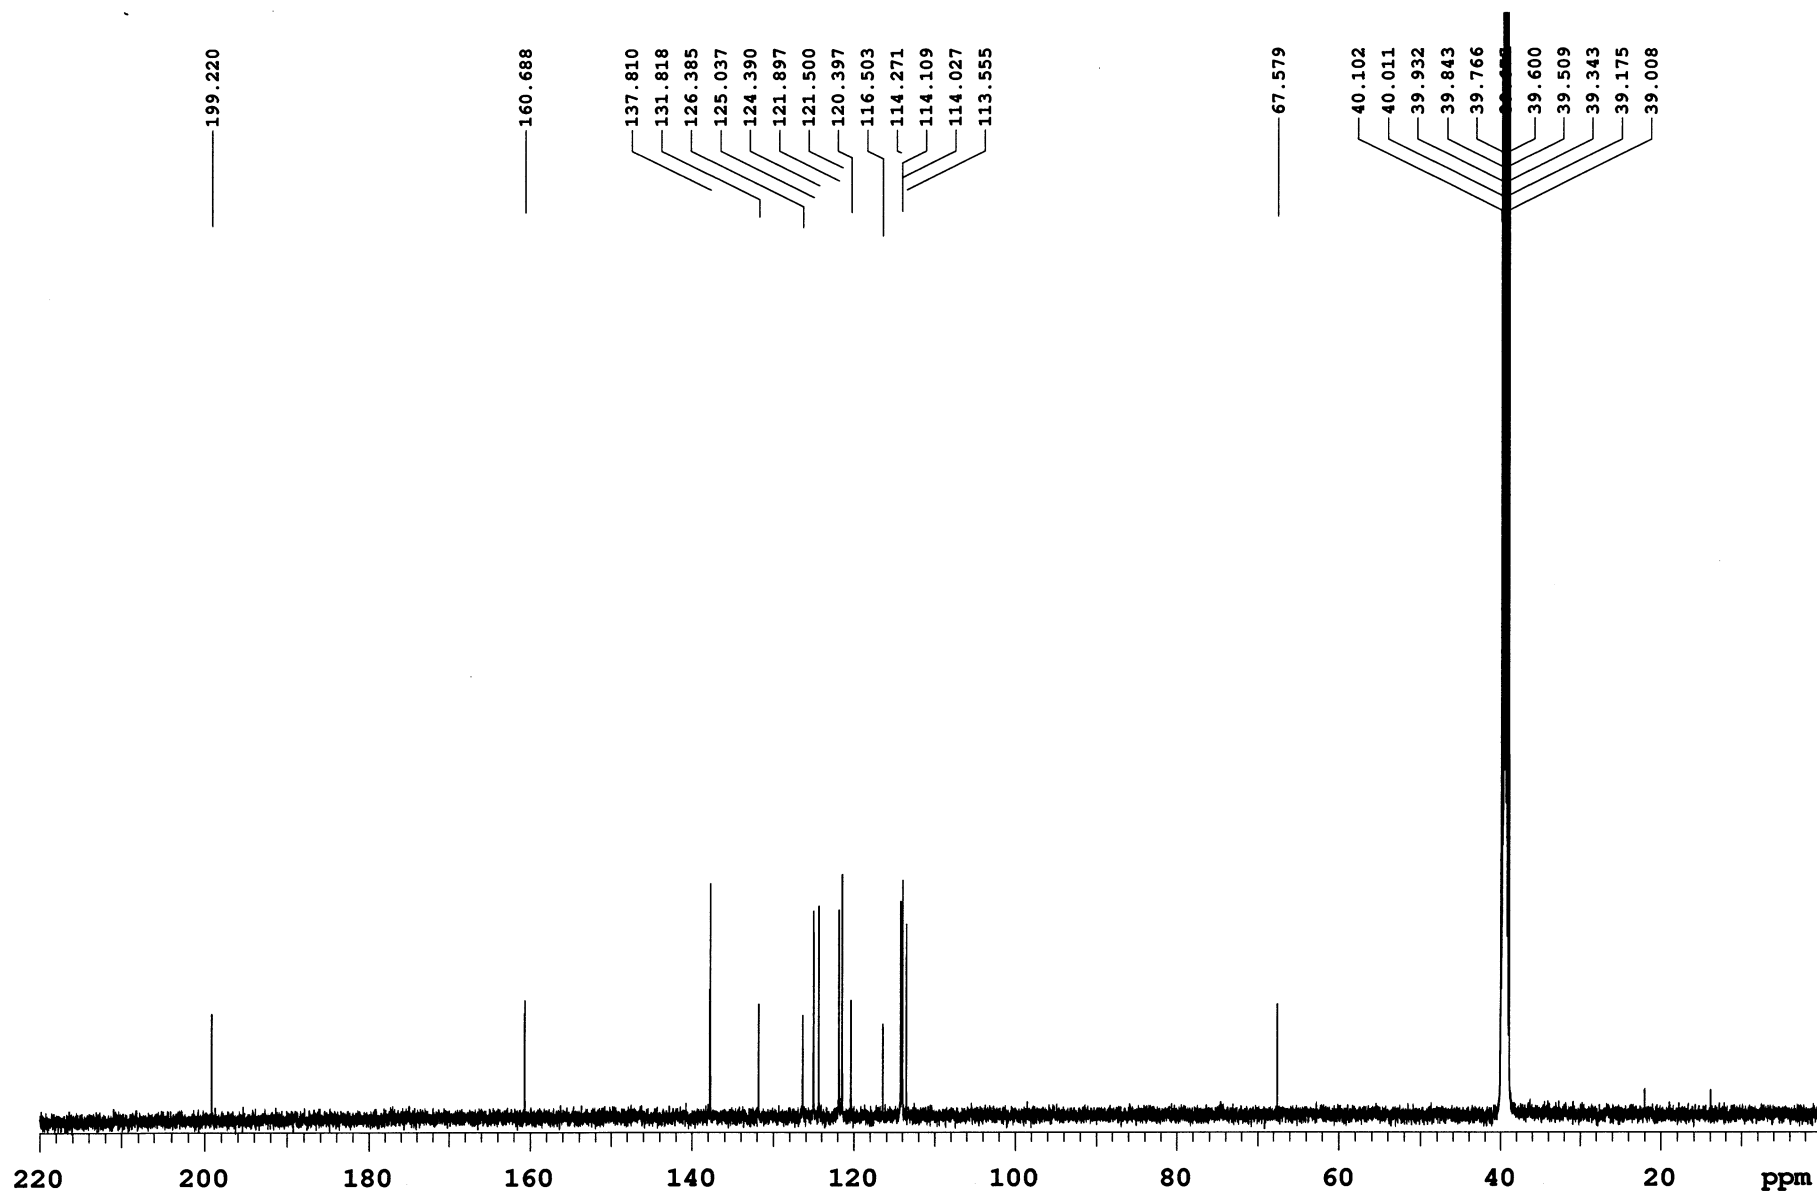

13C NMR (DMSO-d6, 125 MHz) of 1f

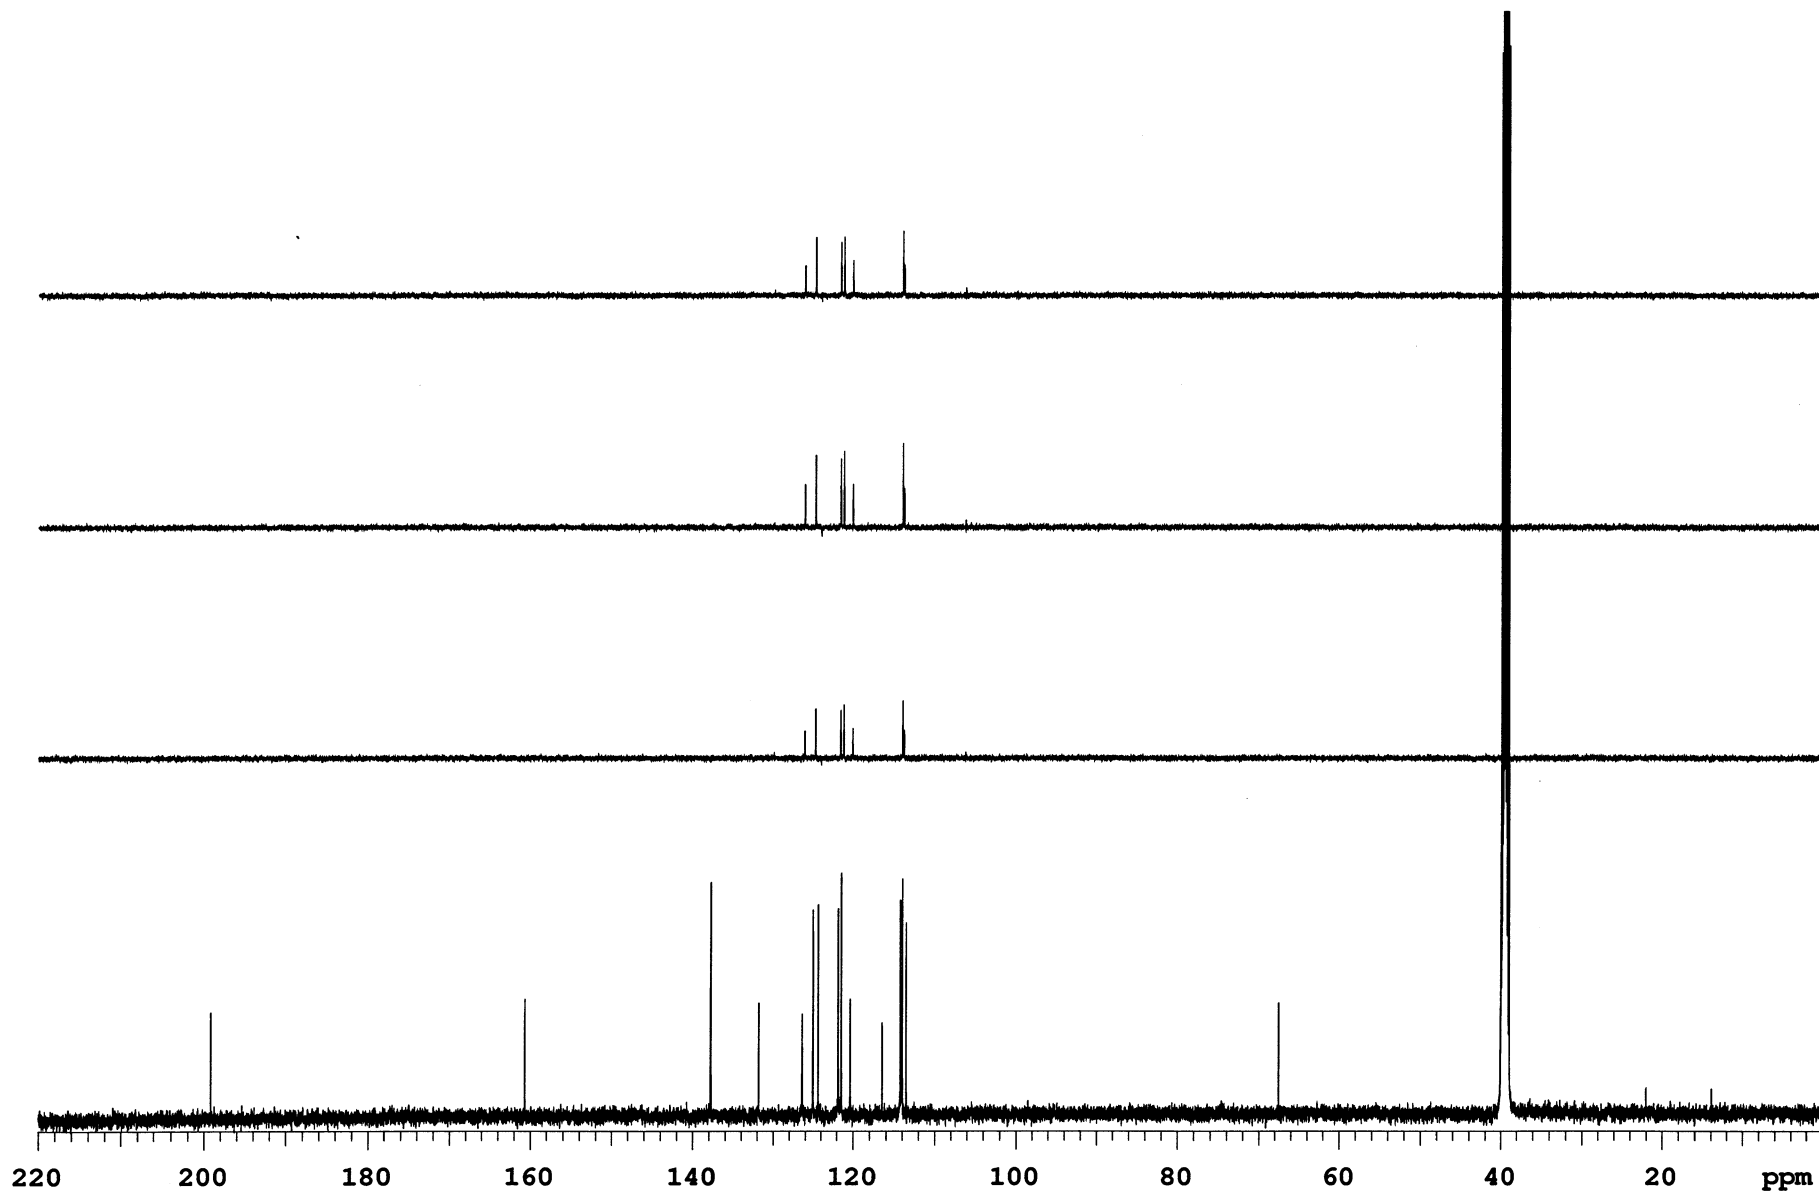

DEPT of 1f



Sample Name **LTC-1-140-14**  
Date collected **2018-11-09**

Pulse sequence **gHSQC**  
Solvent **dmsc**

Temperature **25**  
Spectrometer **Agilent-NMR-inova500**

Study owner **vnmr2**  
Operator **vnmr2**

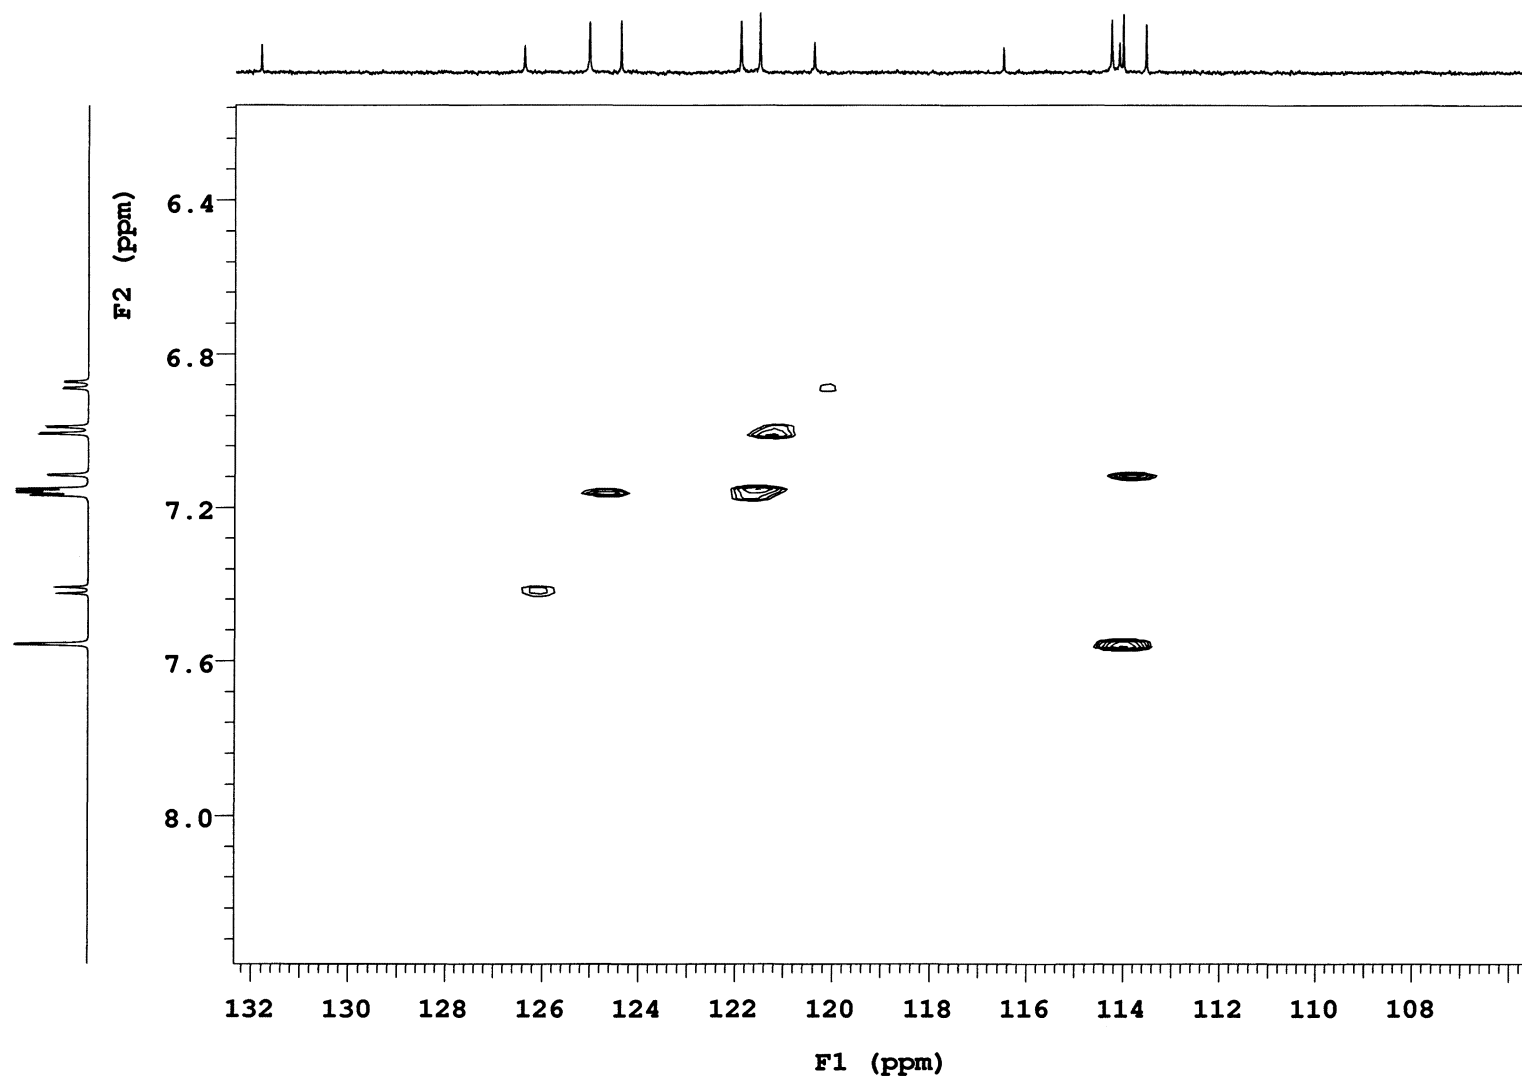

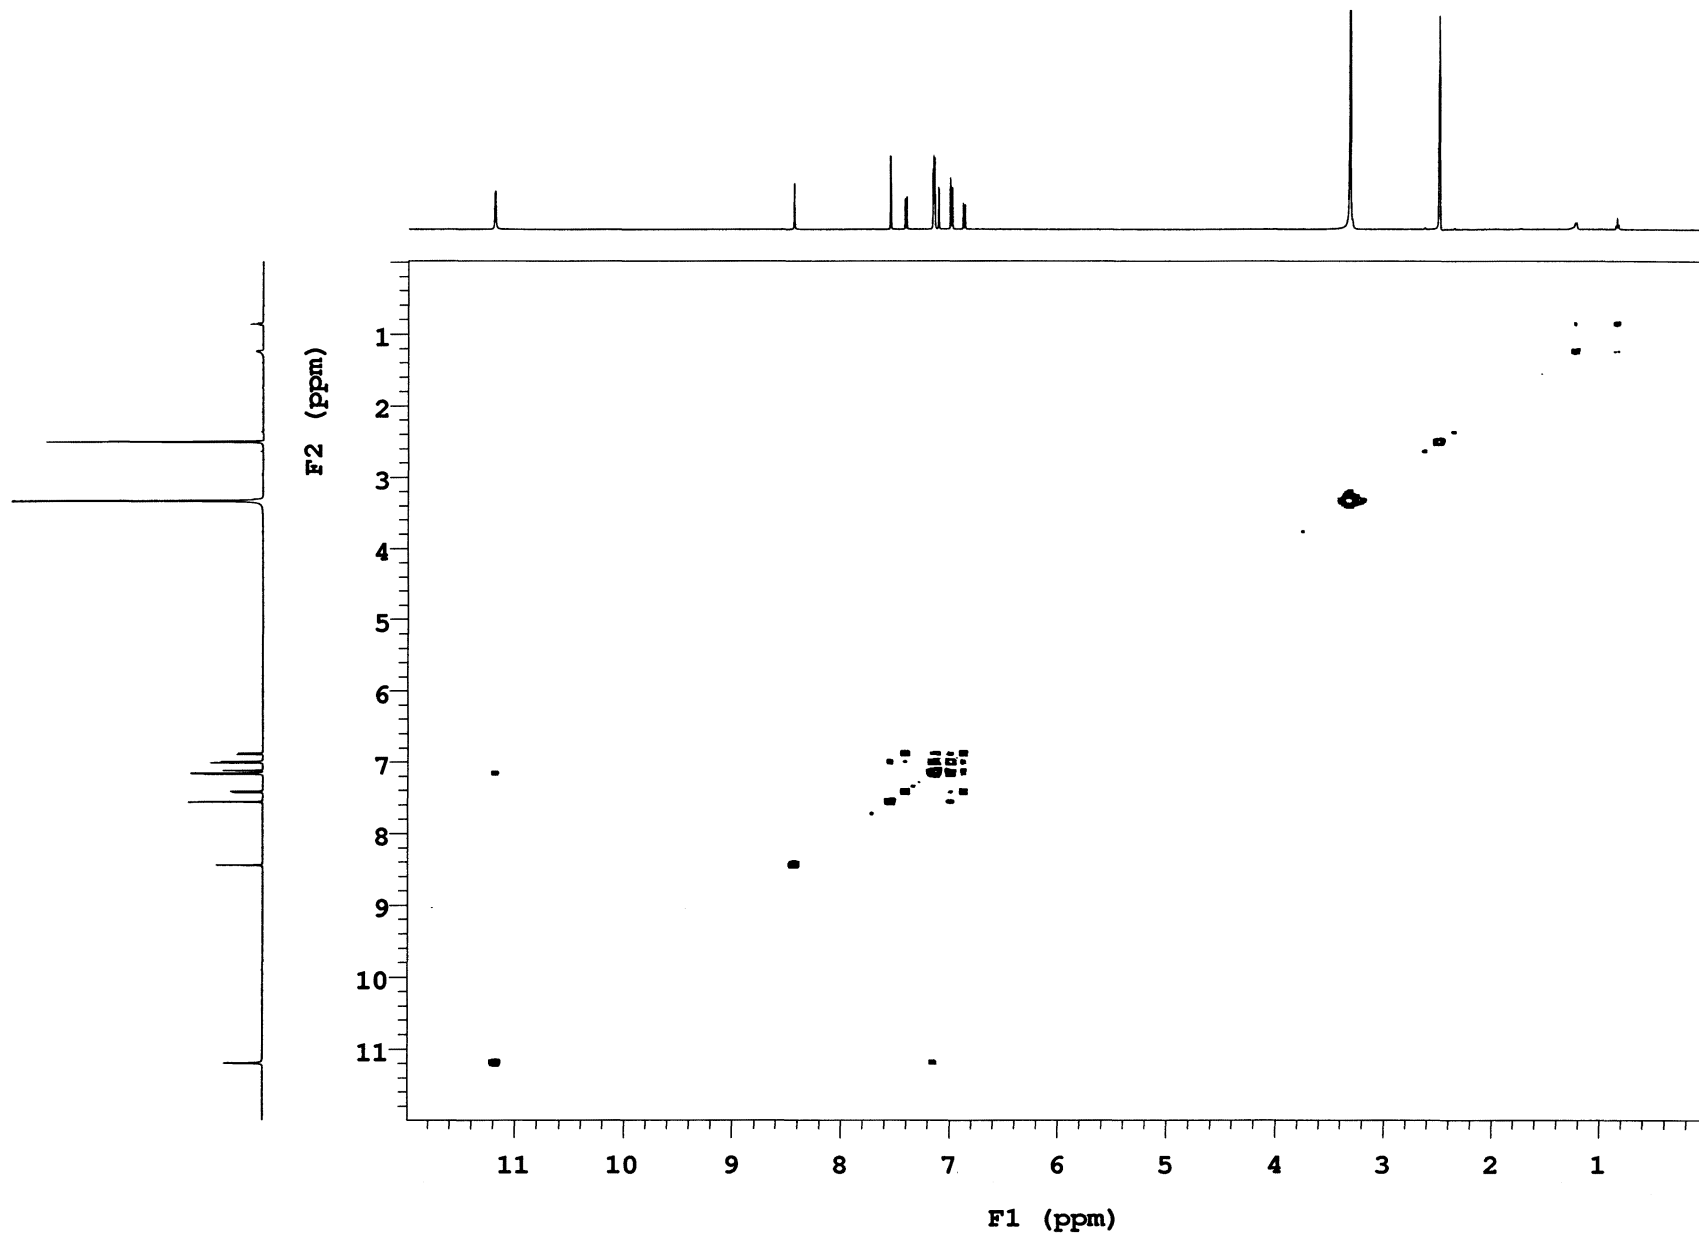

COSY of 1f

Sample Name **LTC-1-140-14**  
Date collected **2018-11-09**Pulse sequence **NOESY**  
Solvent **dms**Temperature **25**  
Spectrometer **Agilent-NMR-inova500**Study owner **vnmr2**  
Operator **vnmr2**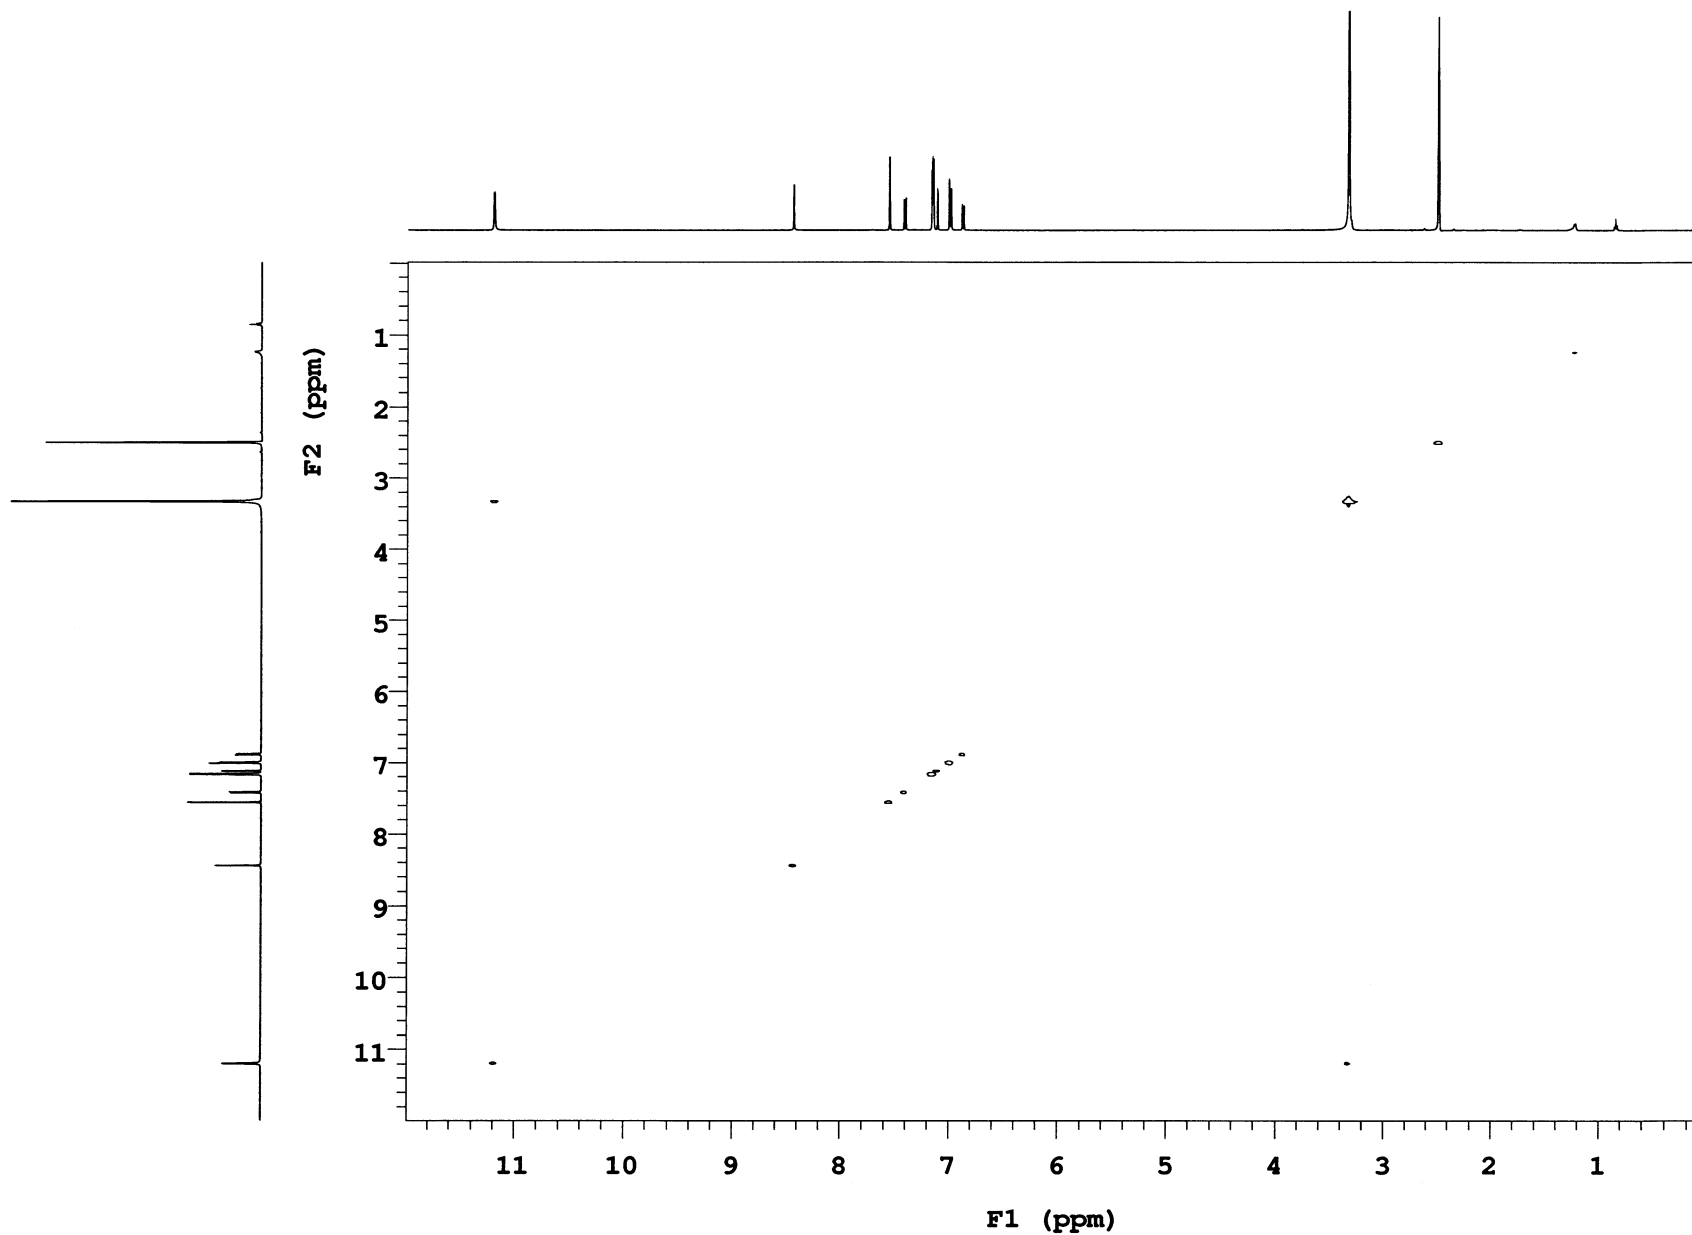

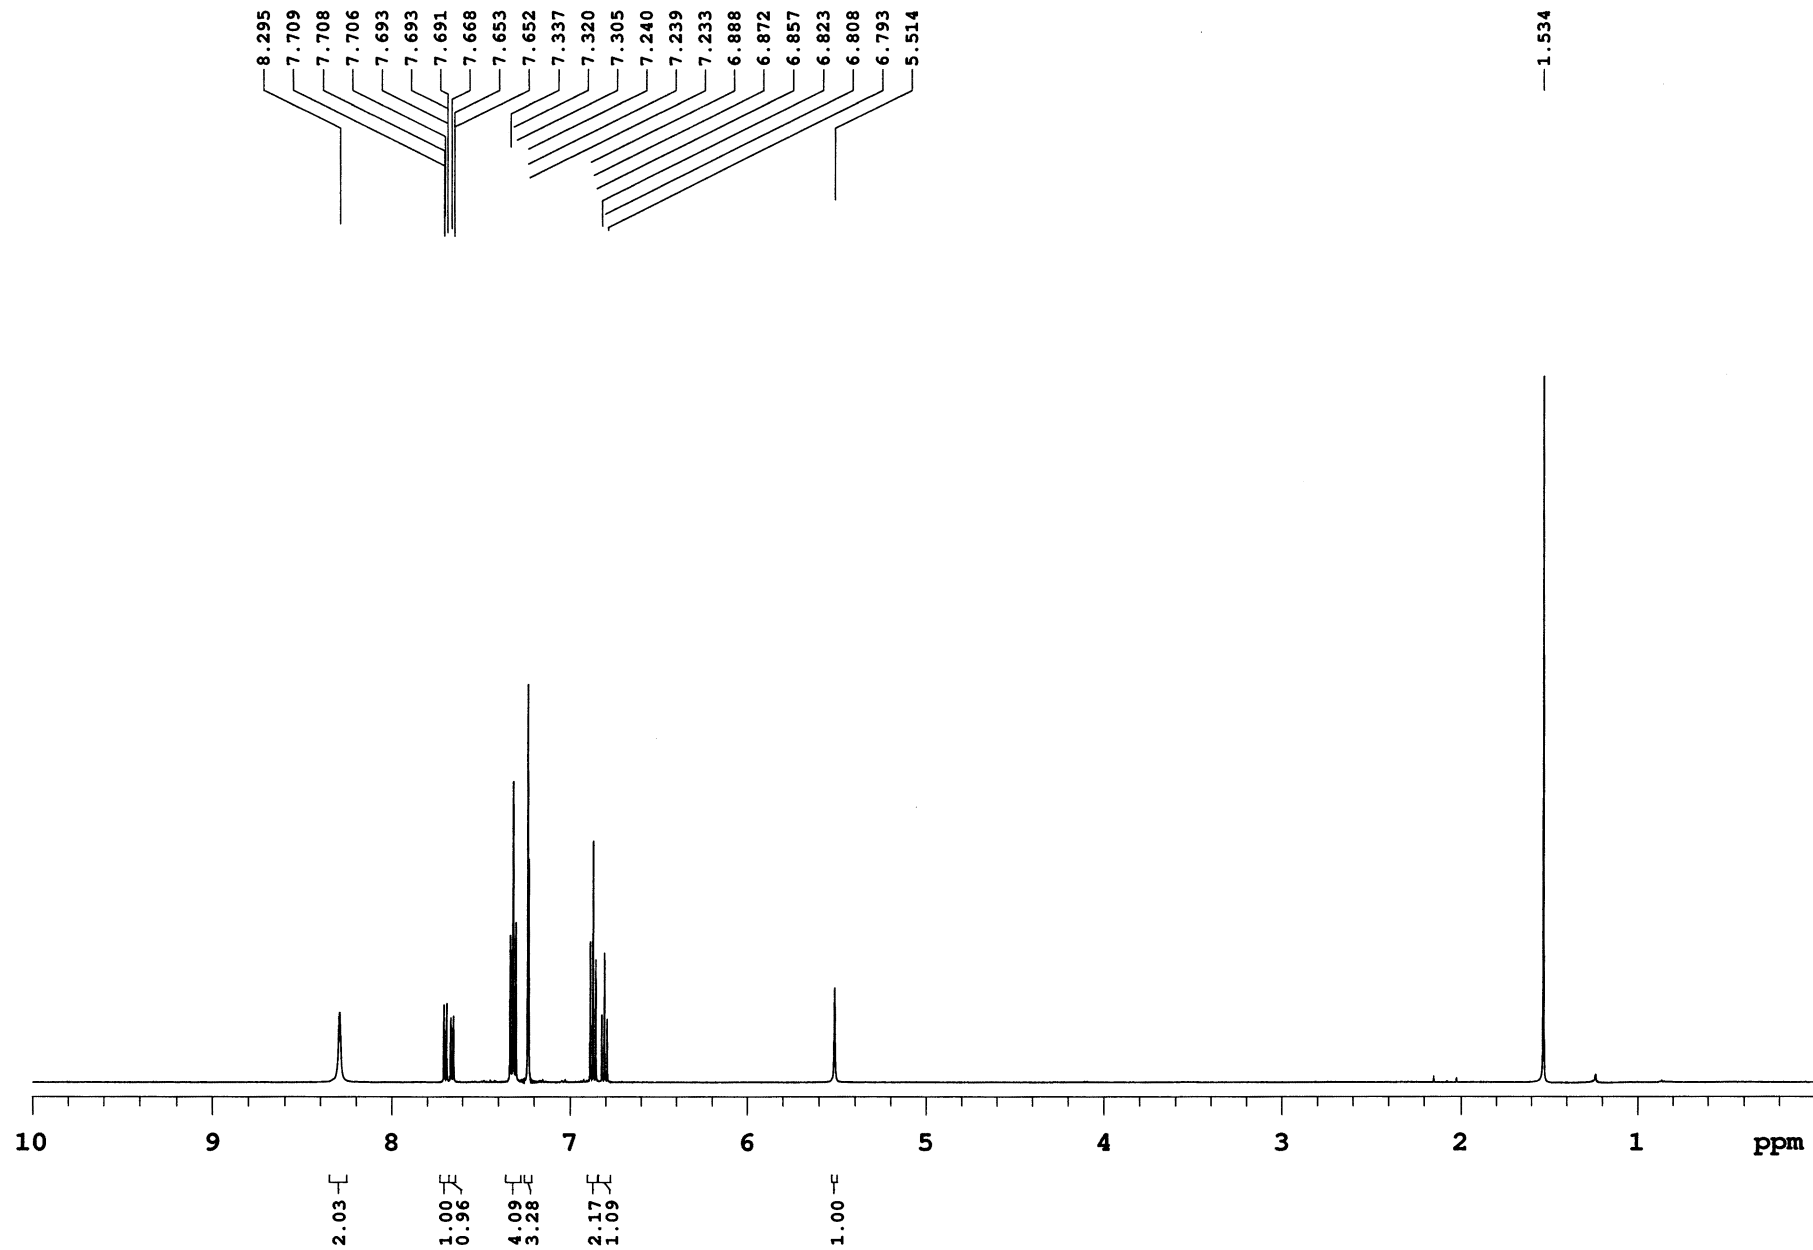

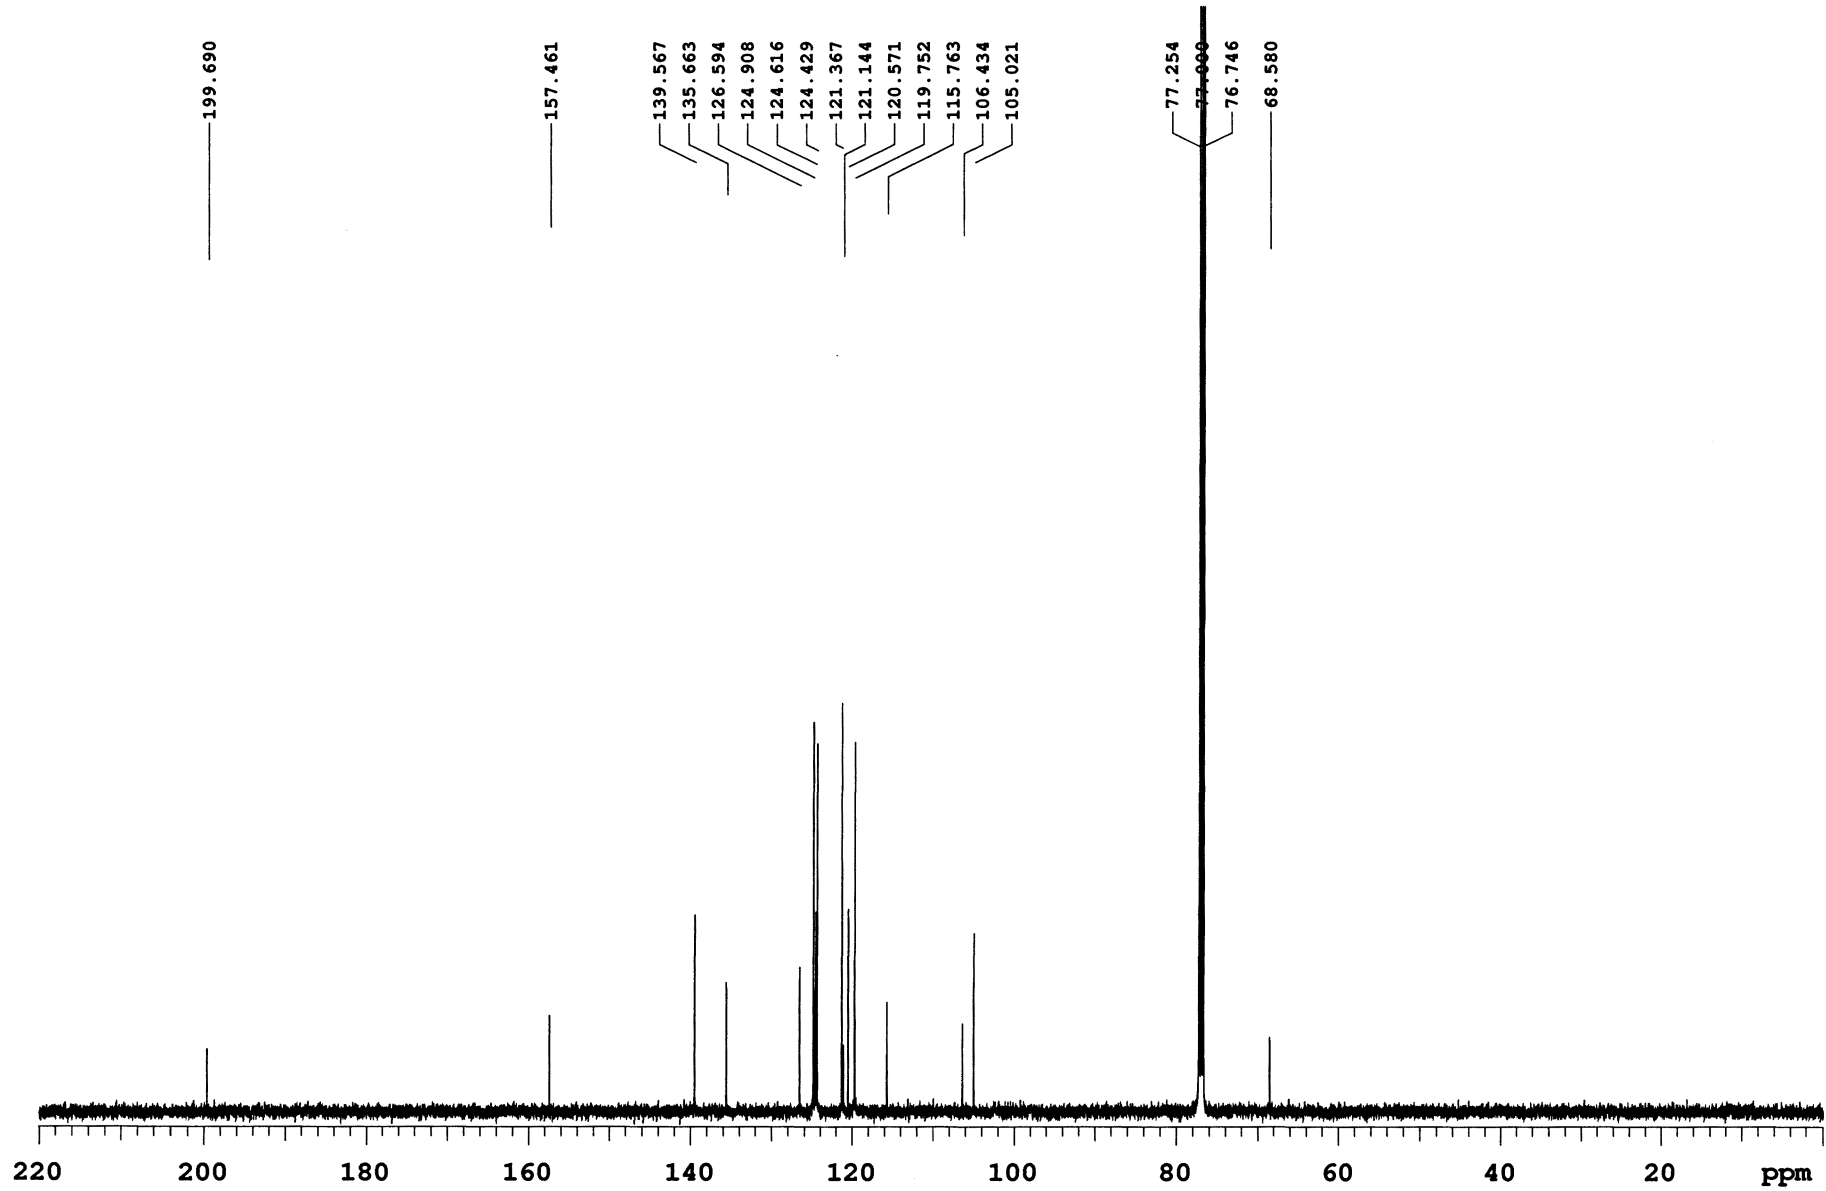13C NMR (CDCl<sub>3</sub>, 125 MHz) of **1g**

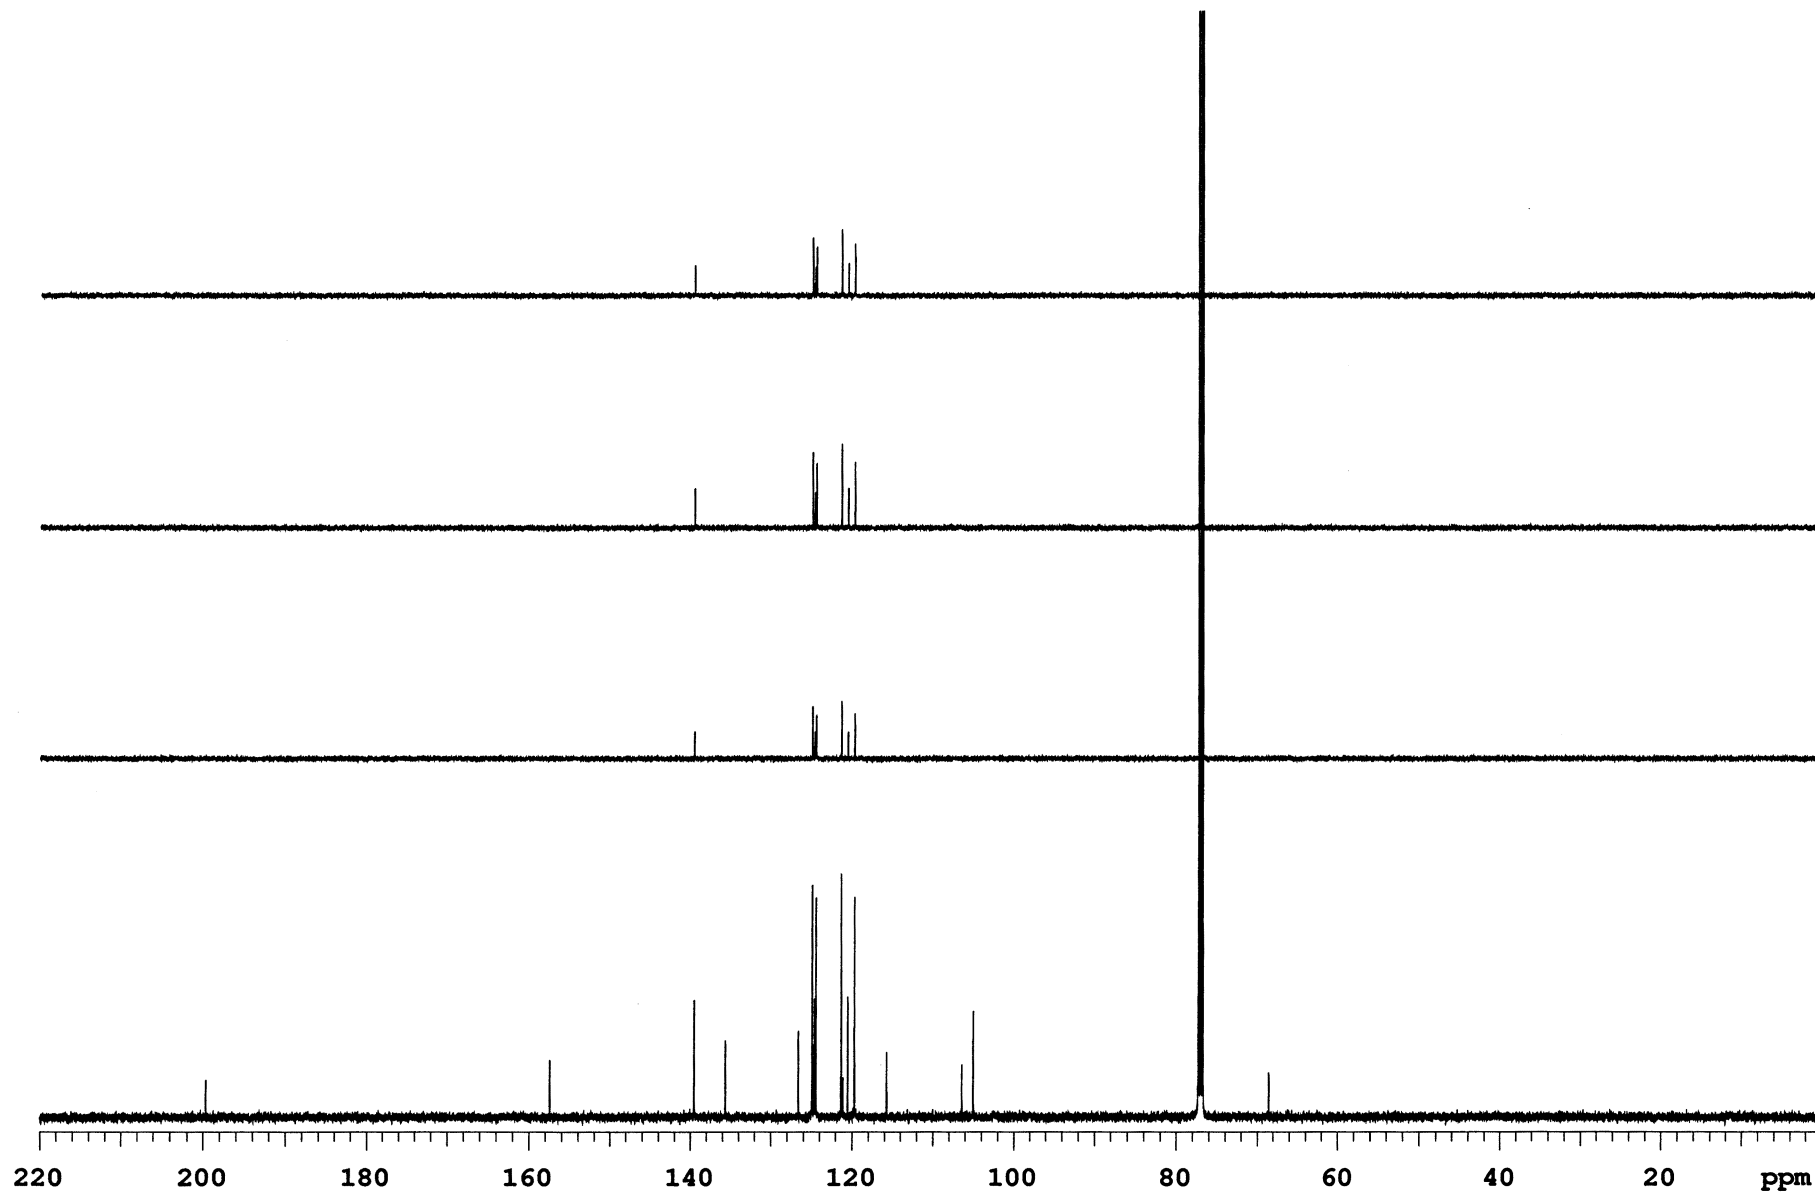

DEPT of 1g

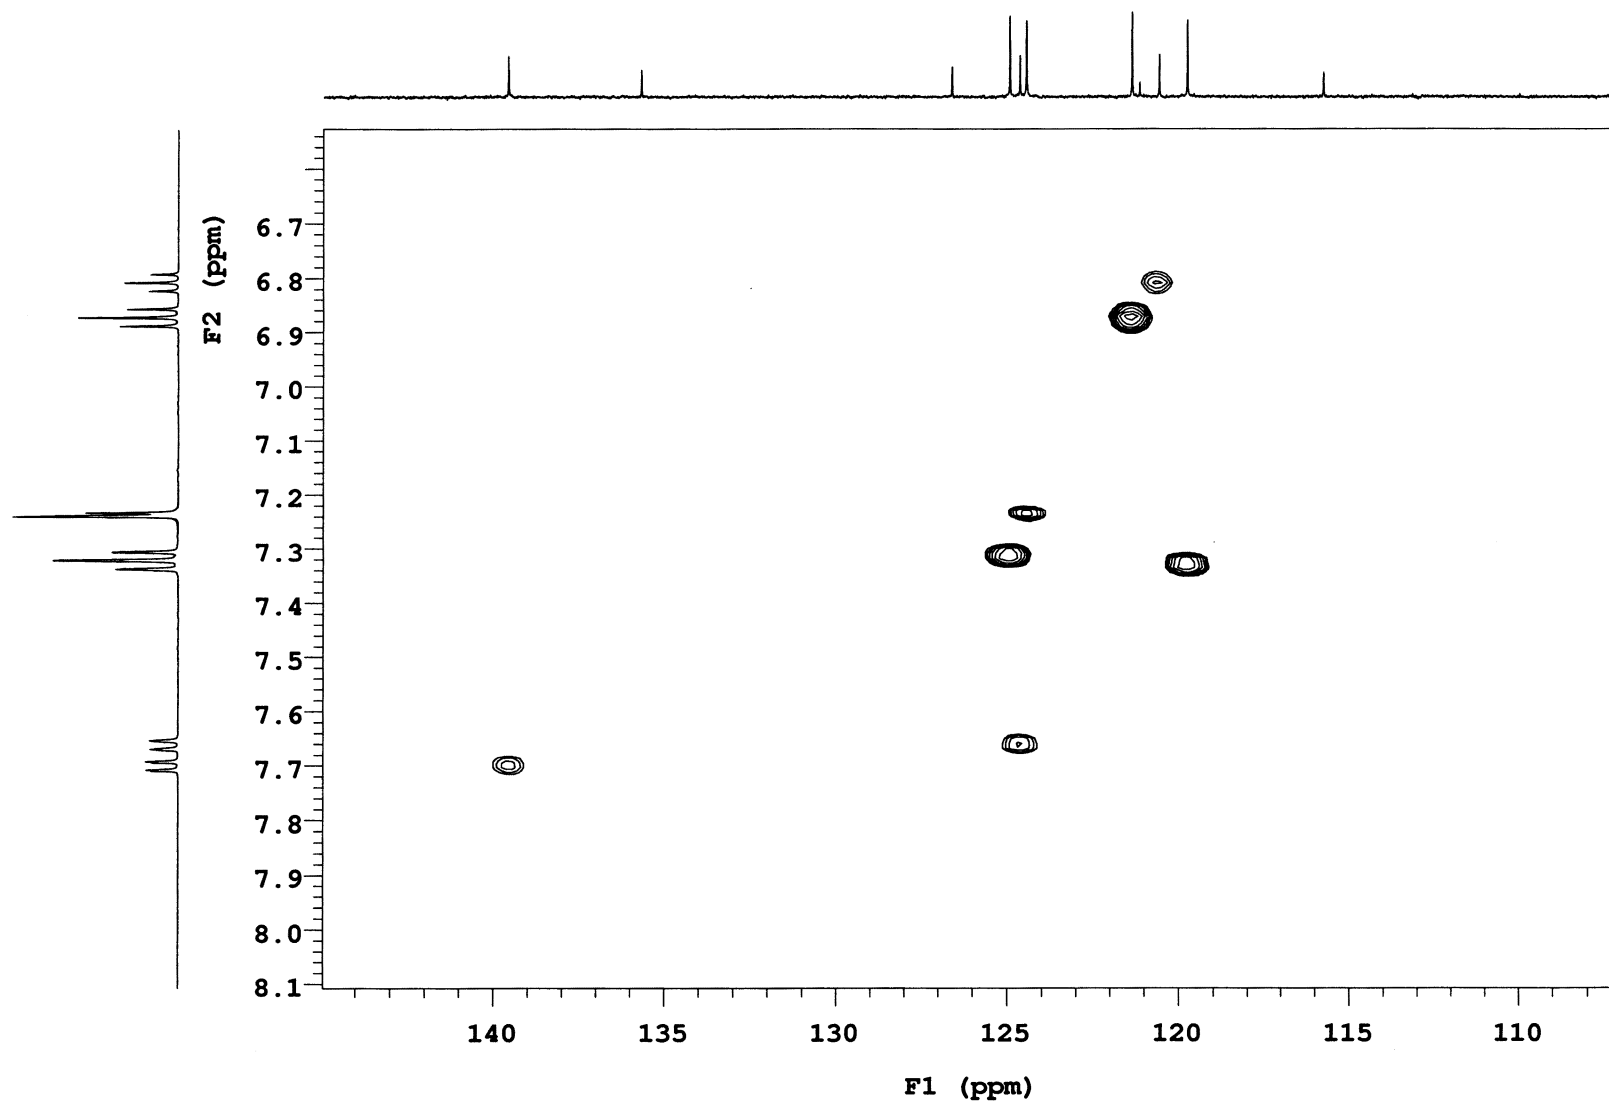

HSQC of 1g

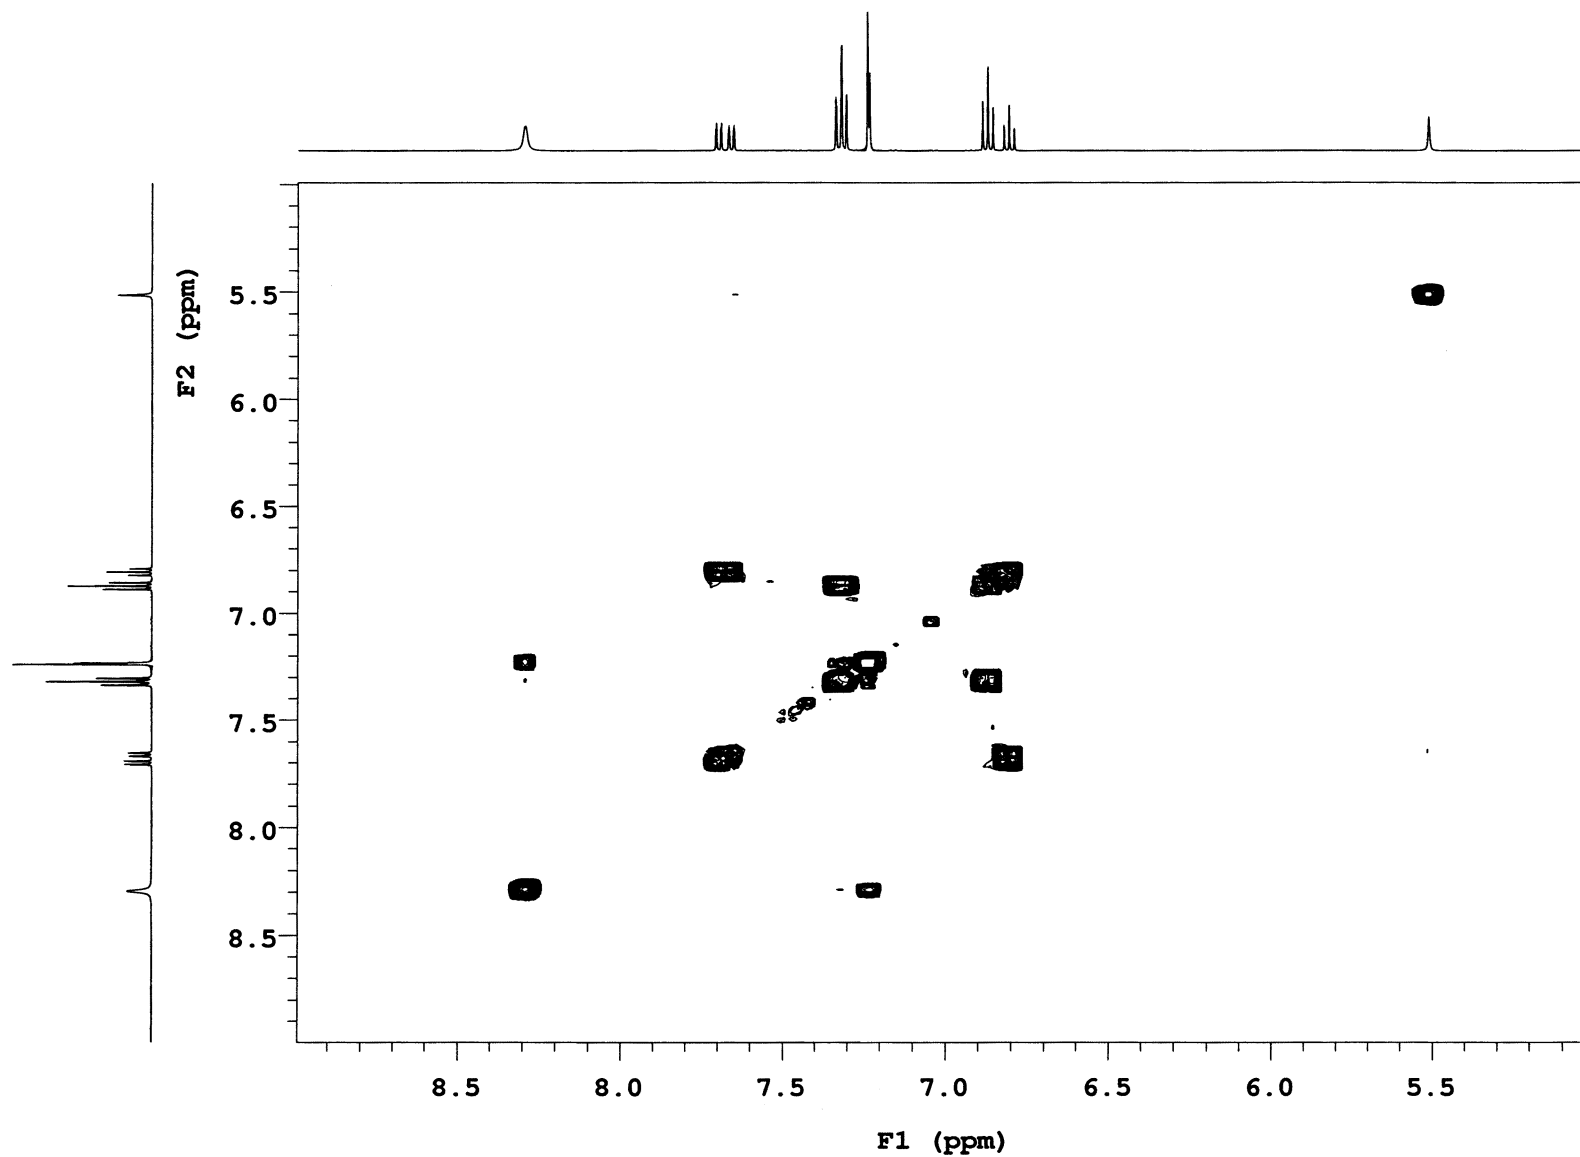



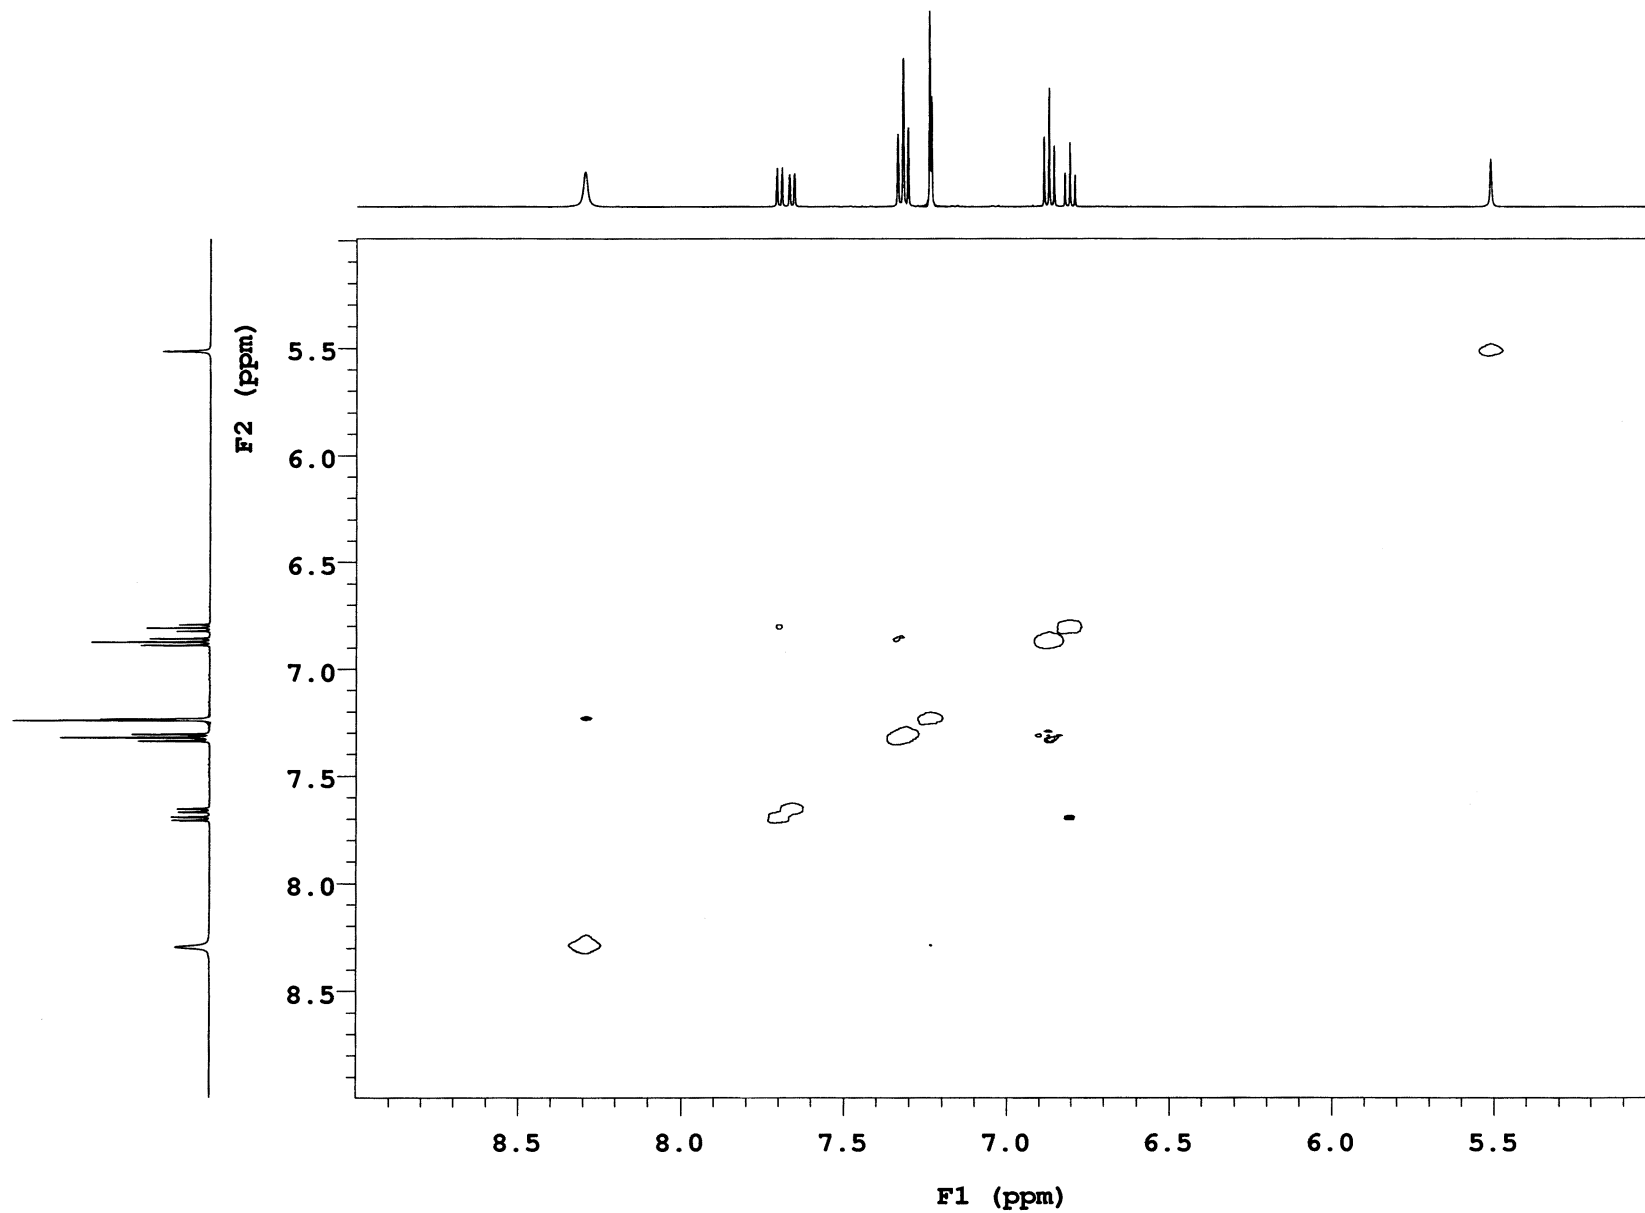

NOESY of 1g

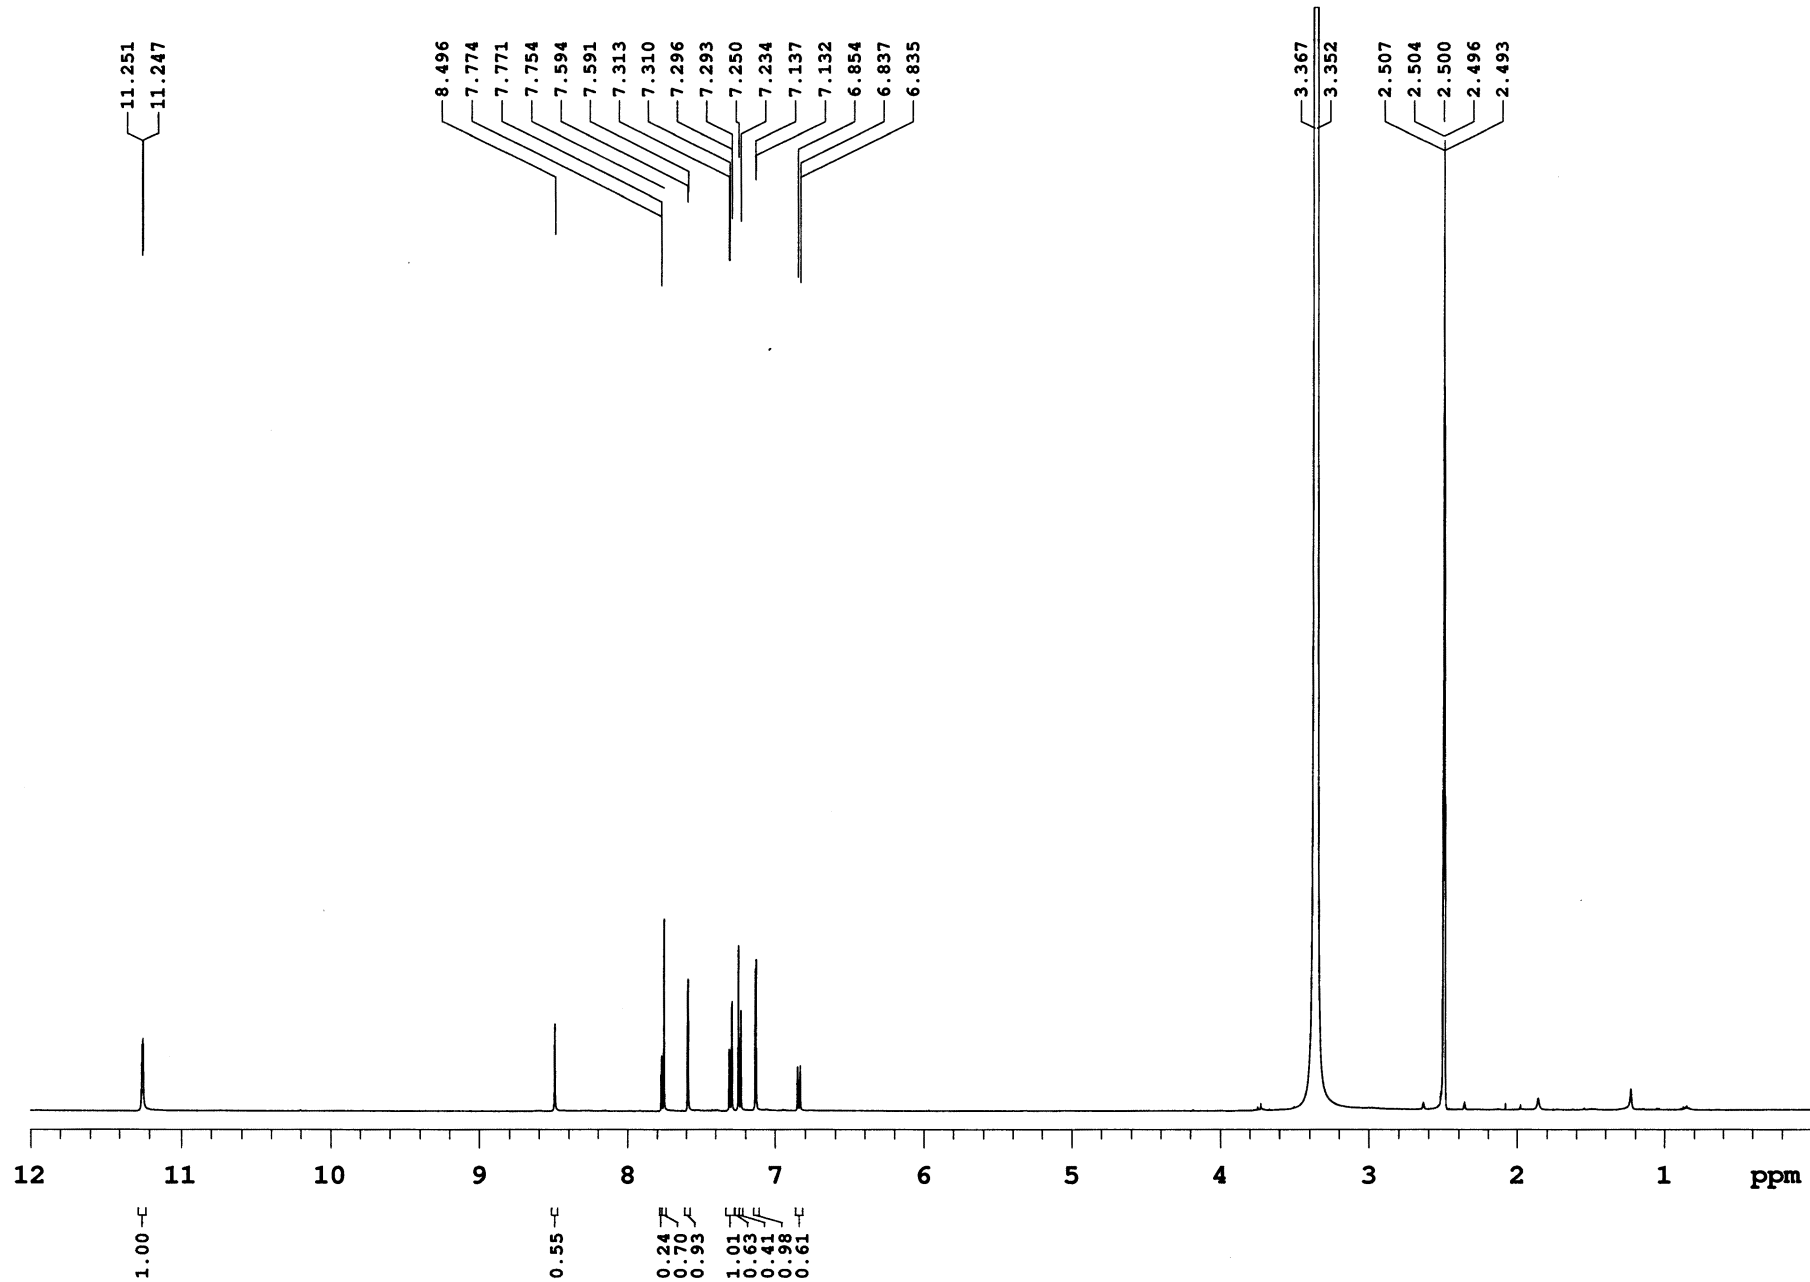

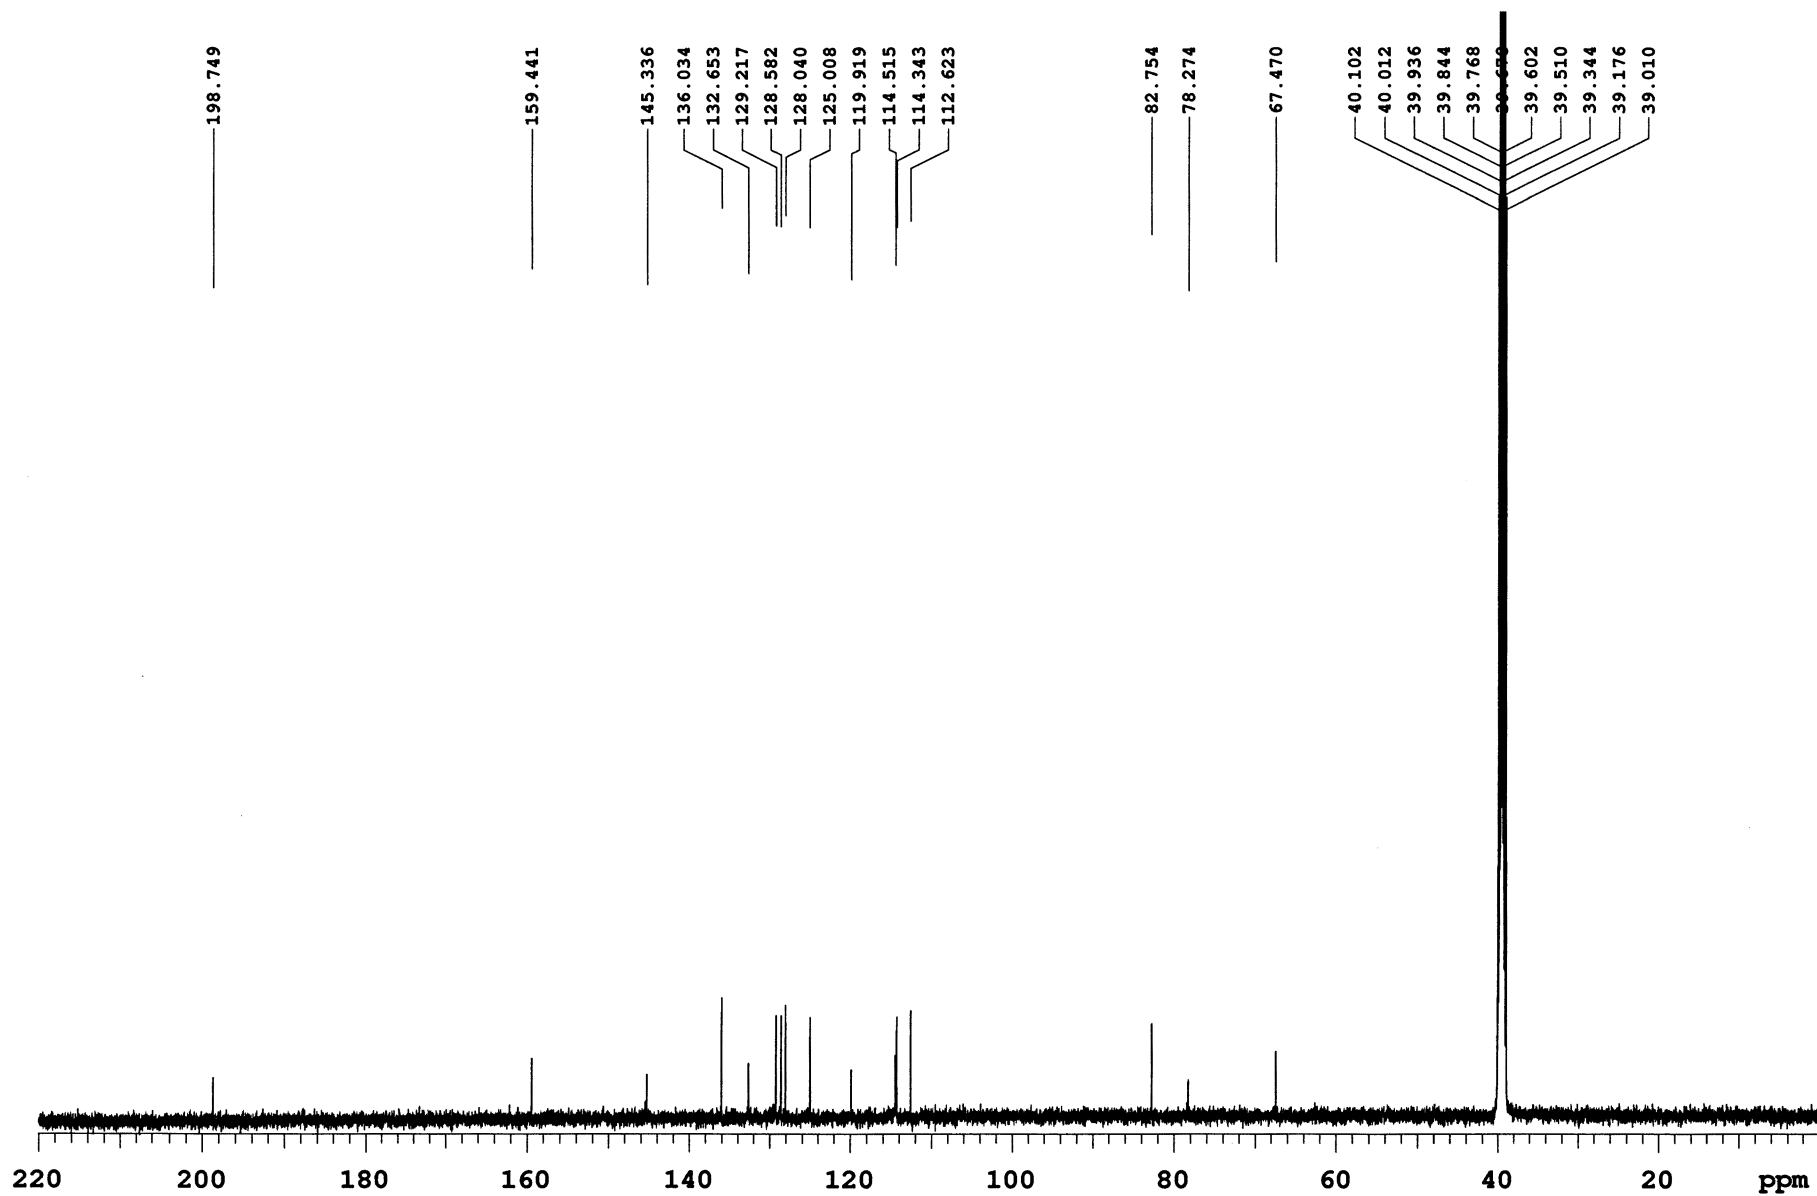

13C NMR (DMSO-d6, 125 Hz) of 1h

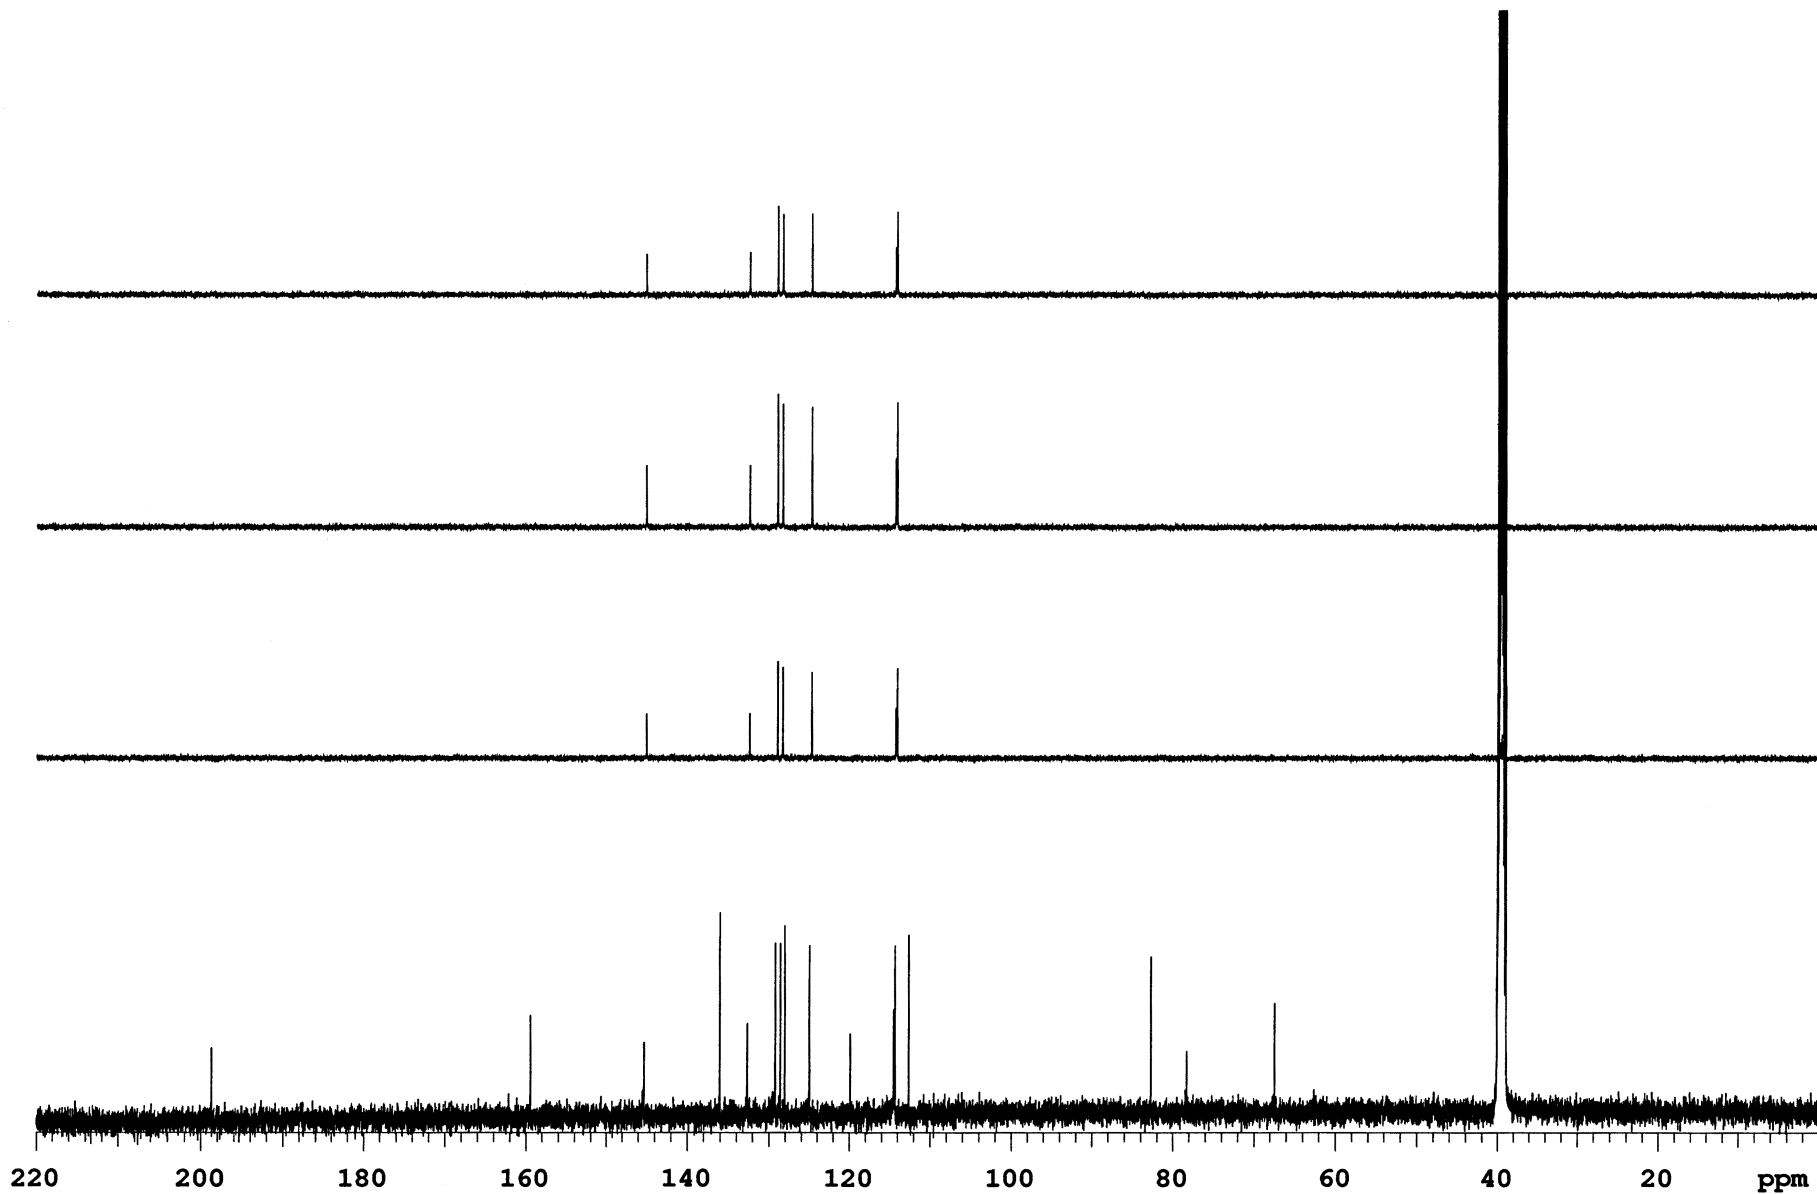

DEPT of 1h

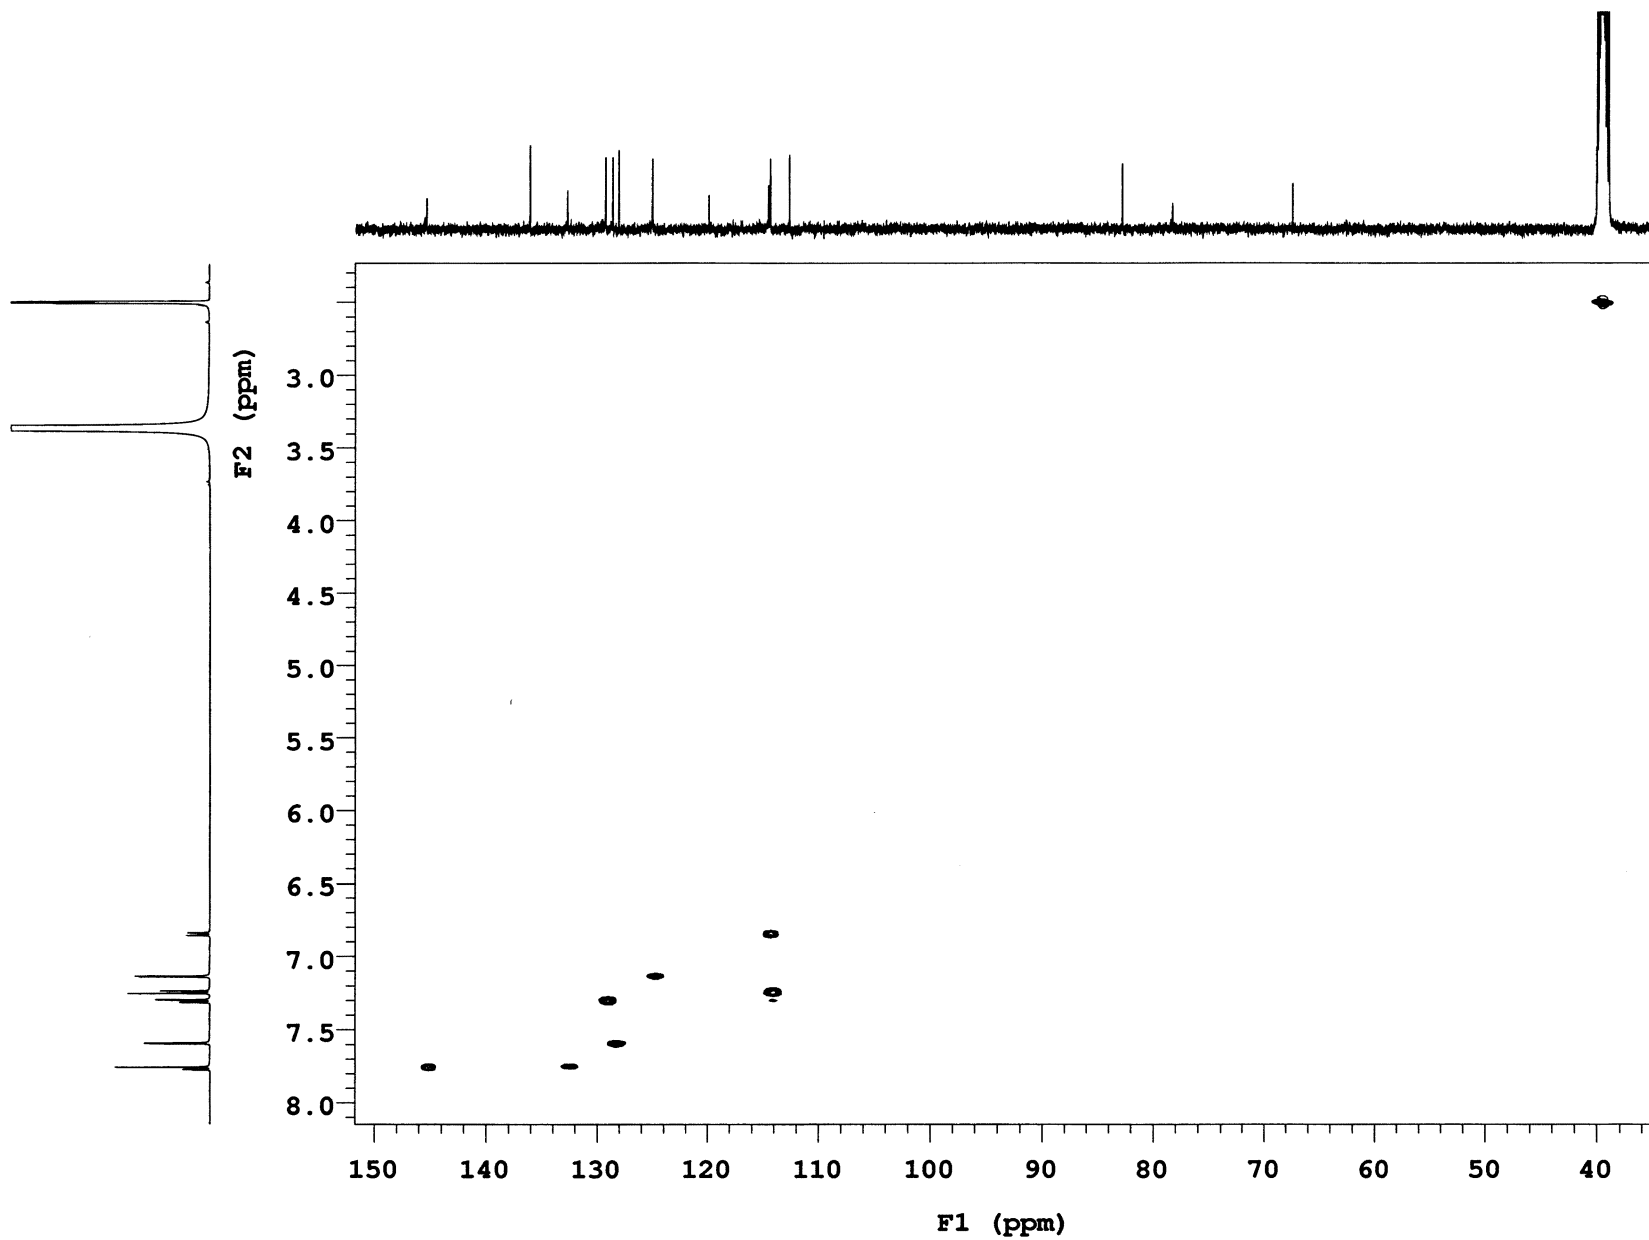

HSQC of 1h

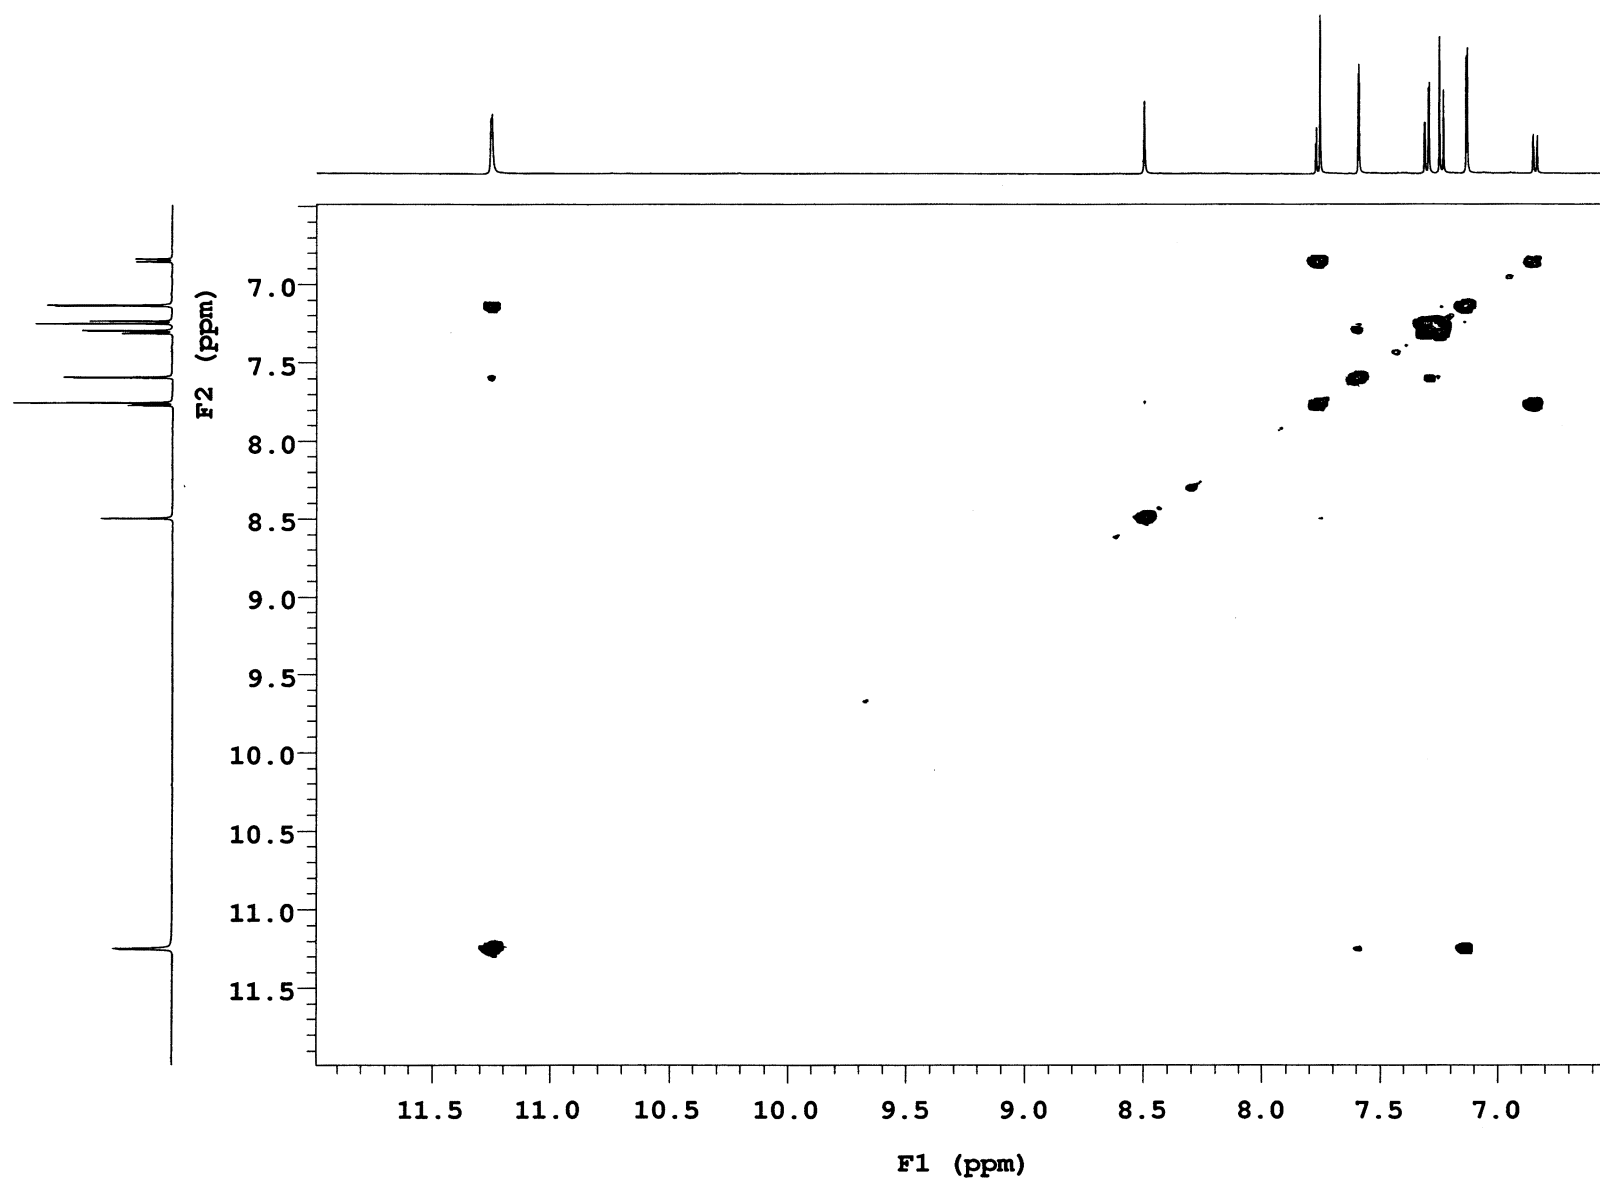

COSY of 1h

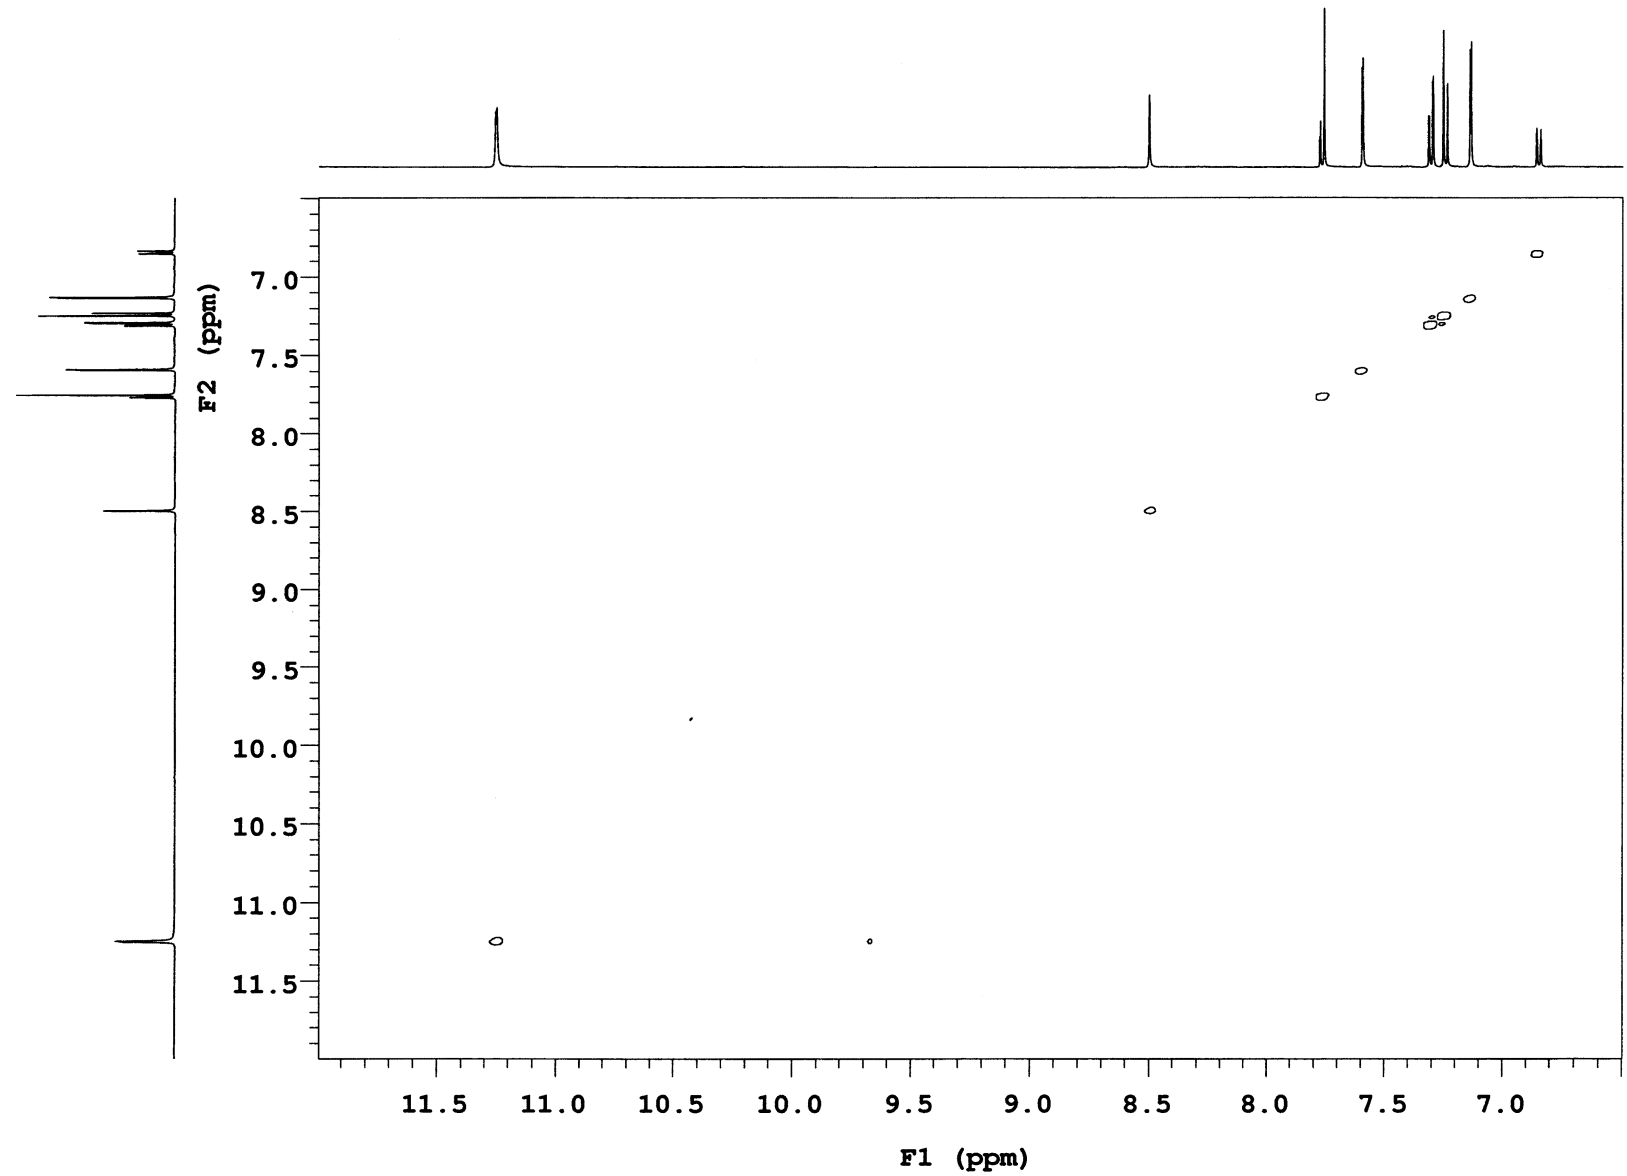

NOESY of 1h

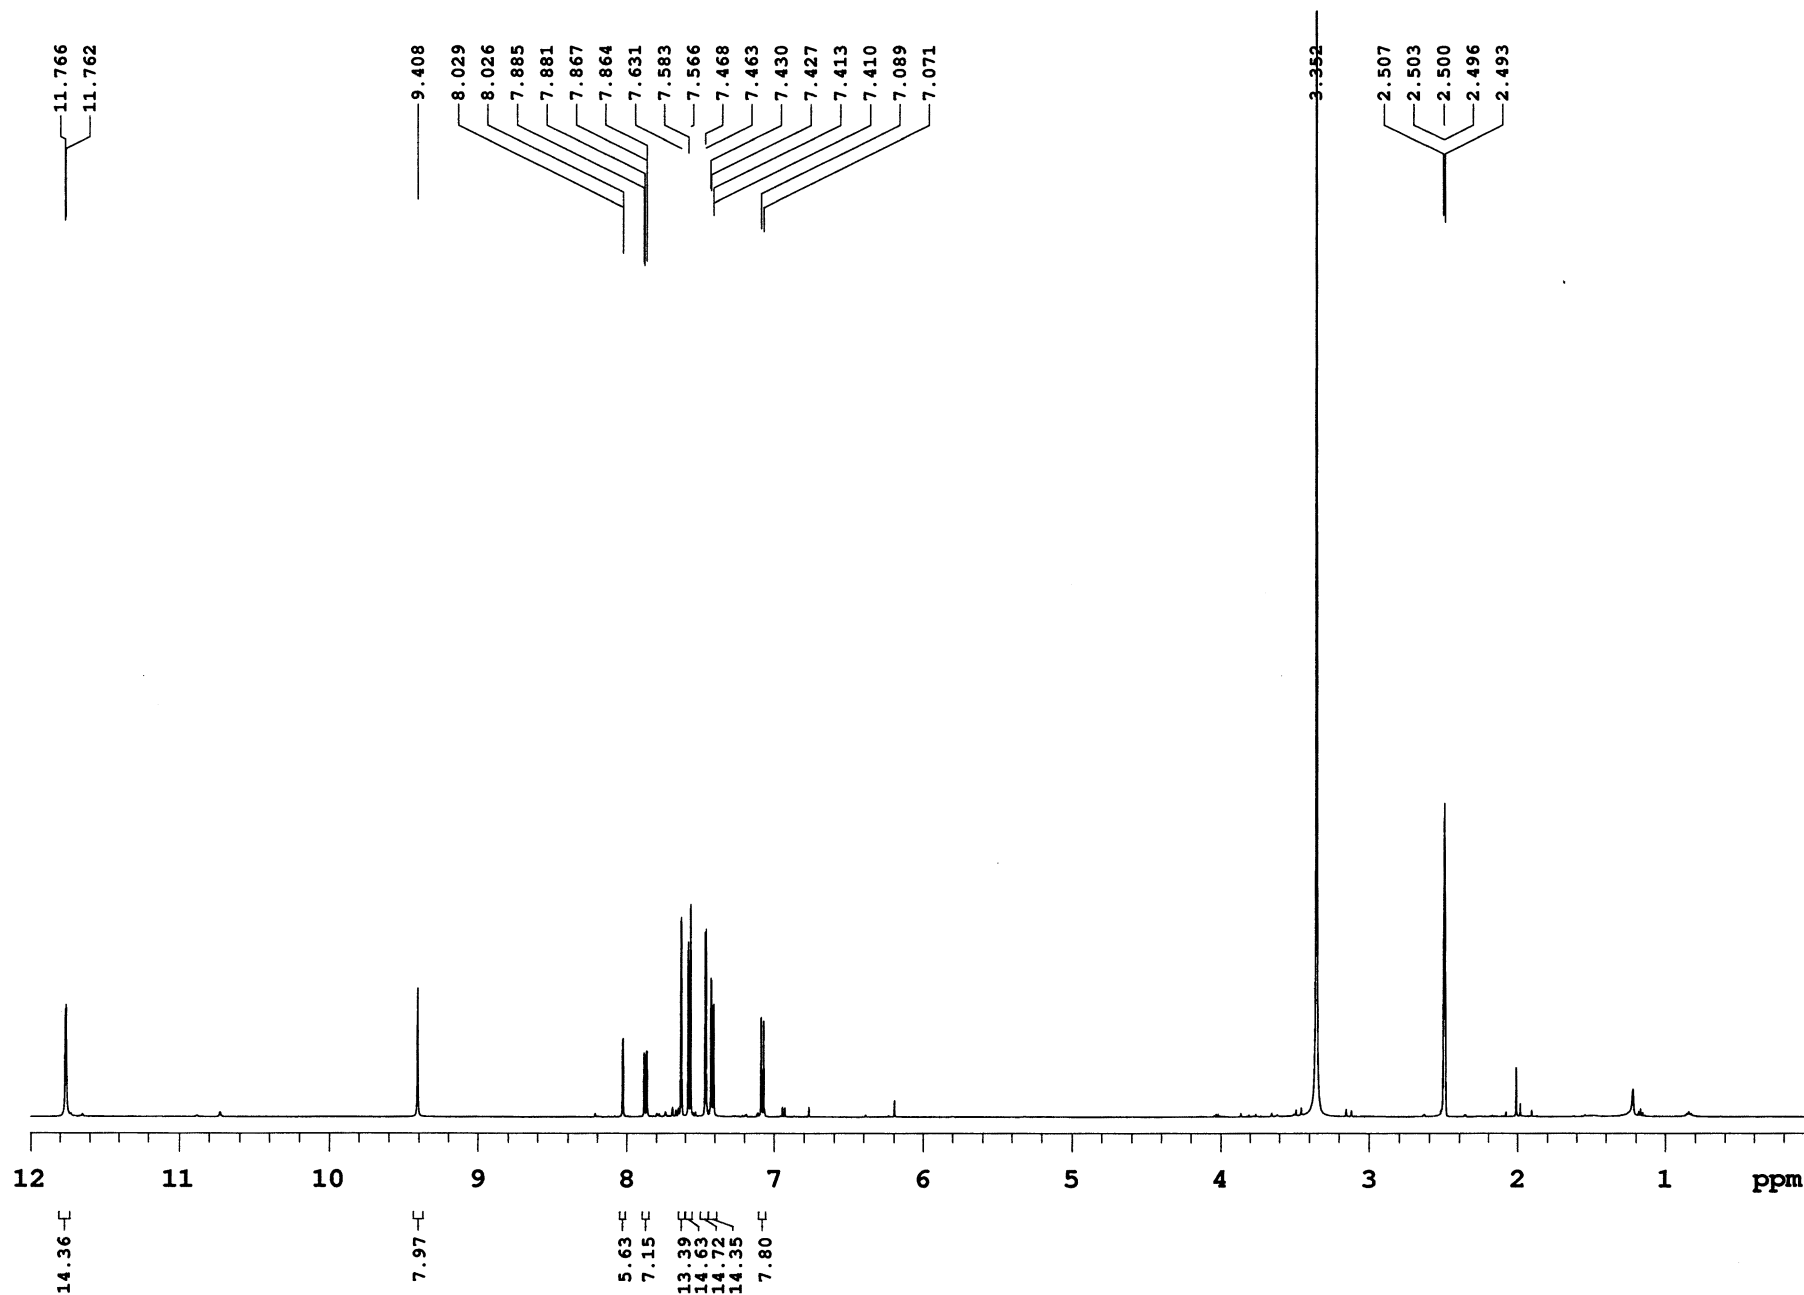



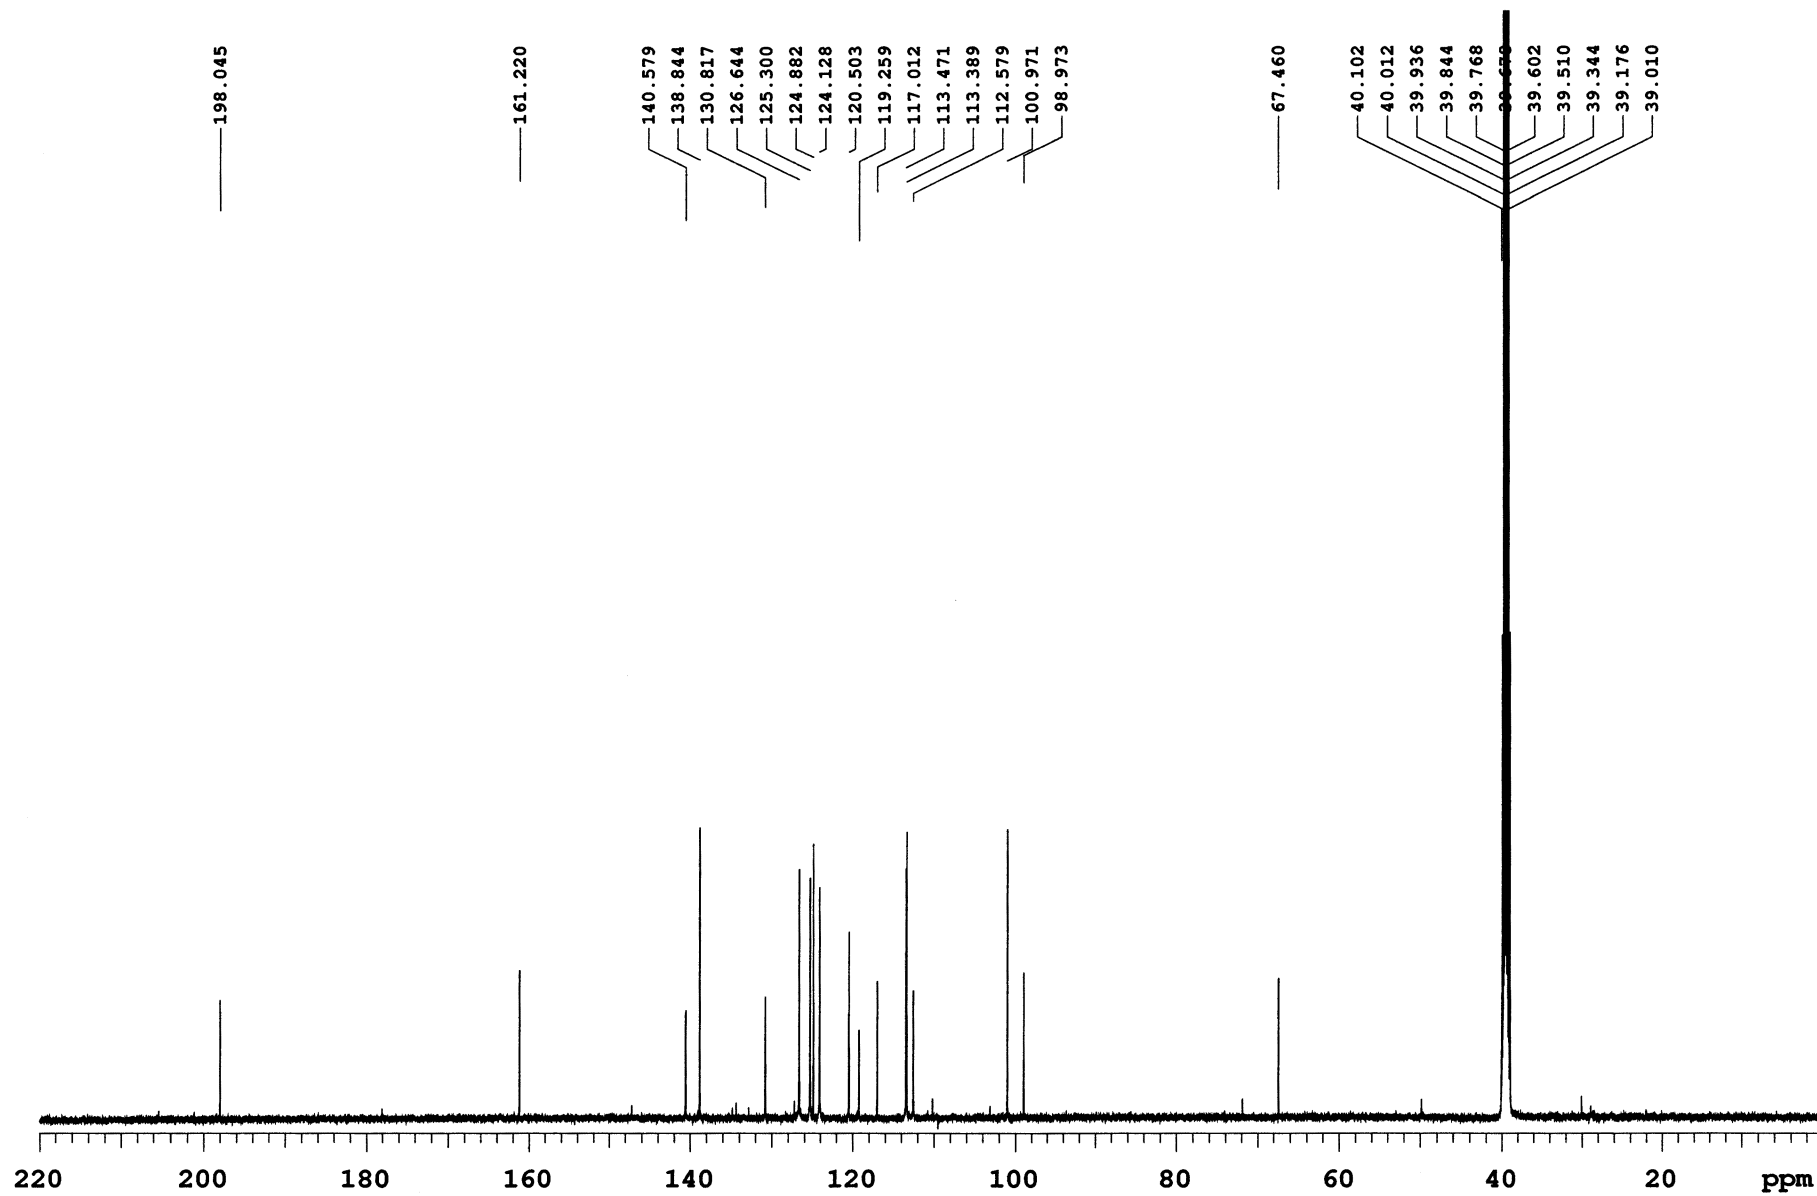

1H NMR (DMSO-d6, 500 Hz) of 1i

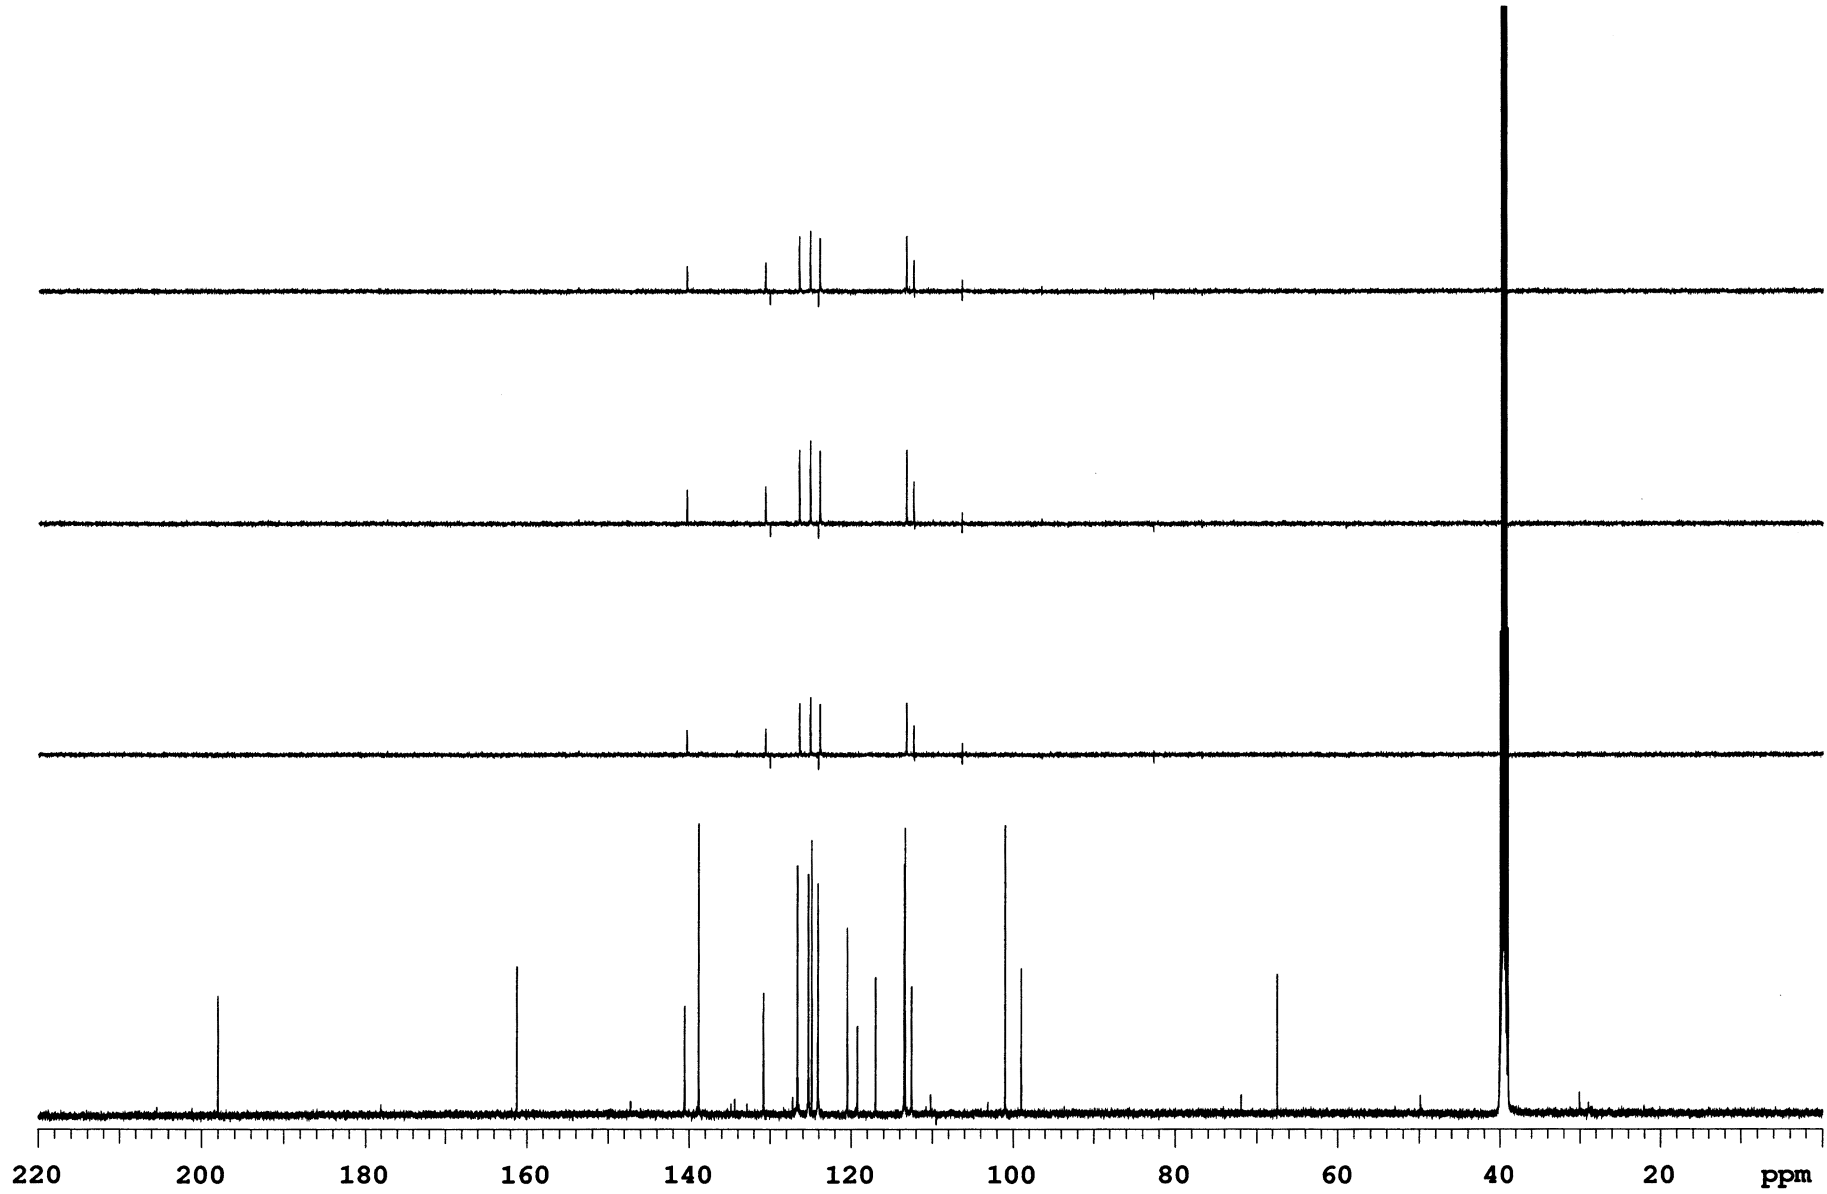

DEPT of 1i

## 1H NMR (DMSO-d6, 400 Hz) of 1j

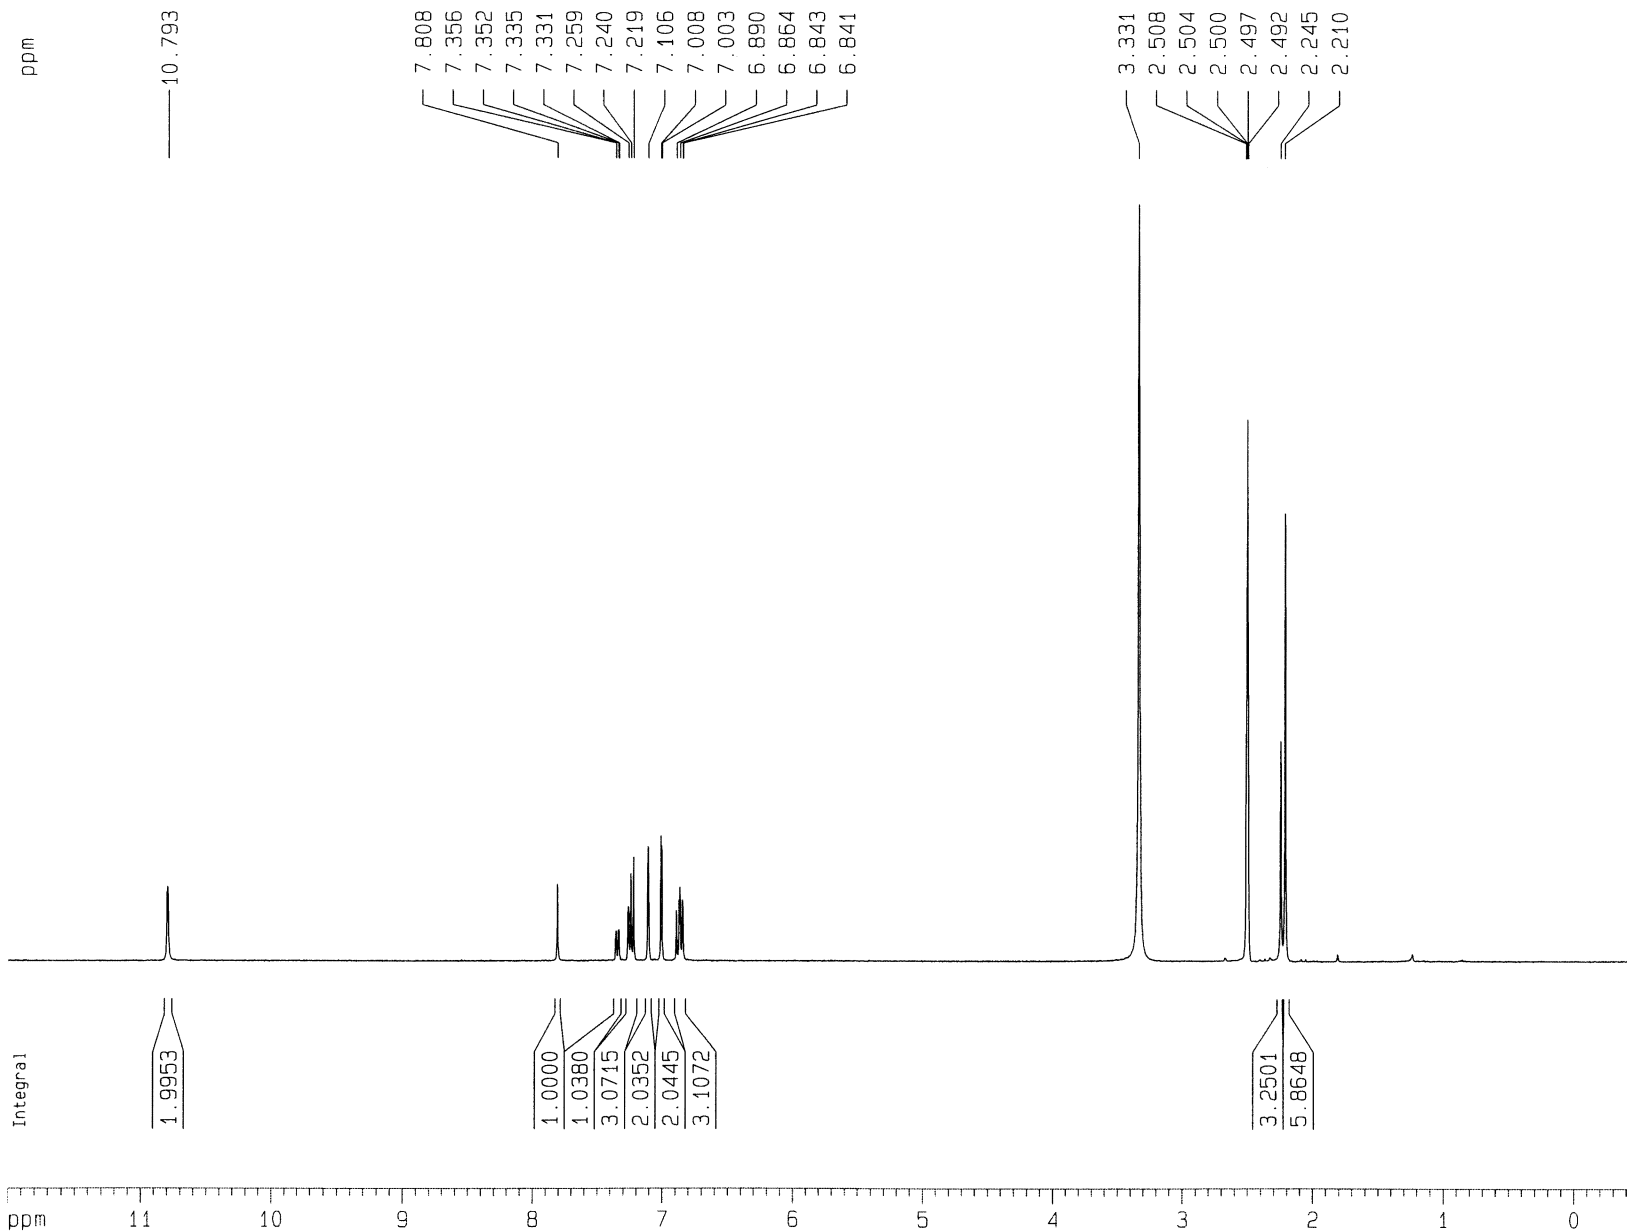

## Current Data Parameters

NAME LTC-1-144-5ch3  
EXPNO 1  
PROCNO 1

## F2 - Acquisition Parameters

Date\_ 20180930  
Time 23.55  
INSTRUM spect  
PROBHD 5 mm QNP 1H  
PULPROG zg30  
TD 16384  
SOLVENT DMSO  
NS 32  
DS 0  
SWH 5995.204 Hz  
FIDRES 0.365918 Hz  
AQ 1.3664756 sec  
RG 11585.2  
DW 83.400 usec  
DE 6.50 usec  
TE 300.0 K  
D1 1.50000000 sec

## ===== CHANNEL f1 =====

NUC1 1H  
P1 15.00 usec  
PL1 1.00 dB  
SF01 400.1326008 MHz

## F2 - Processing parameters

SI 8192  
SF 400.1300022 MHz  
WDW EM  
SSB 0  
LB 0.10 Hz  
GB 0  
PC 1.00

## 1D NMR plot parameters

CX 21.50 cm  
F1P 12.000 ppm  
F1 4801.56 Hz  
F2P -0.500 ppm  
F2 -200.07 Hz  
PPMCM 0.58140 ppm/cm  
HZCM 232.63374 Hz/cm

## 1H NMR (DMSO-d6, 100 Hz) of 1j

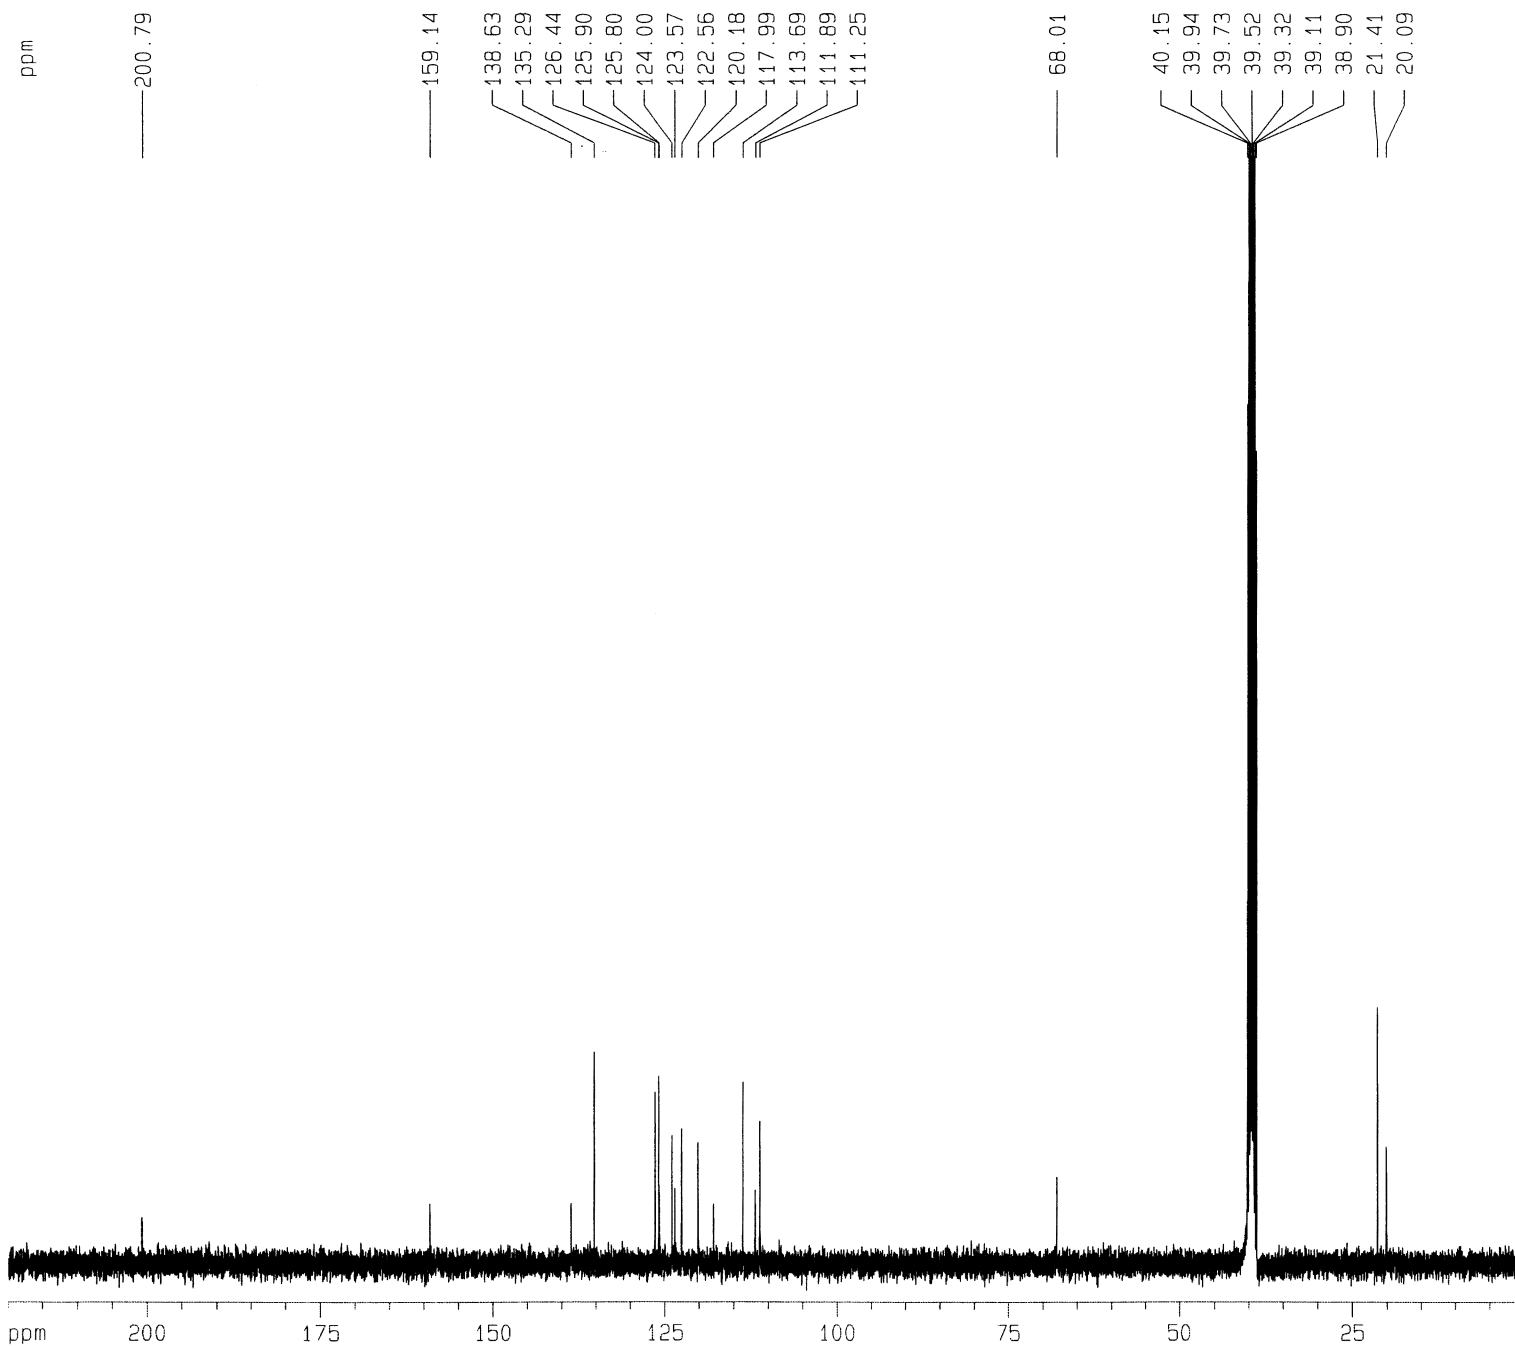

Current Data Parameters  
 NAME LTC-1-144-5ch3  
 EXPNO 2  
 PROCNO 1

F2 - Acquisition Parameters  
 Date\_ 20181001  
 Time 3.45  
 INSTRUM spect  
 PROBHD 5 mm GNP 1H  
 PULPROG zgpg30  
 TD 65536  
 SOLVENT CDC13  
 NS 4096  
 DS 4  
 SWH 25125.629 Hz  
 FIDRES 0.383387 Hz  
 AQ 1.3042164 sec  
 RG 256  
 DW 19.900 usec  
 DE 6.50 usec  
 TE 300.0 K  
 D1 2.00000000 sec  
 d11 0.03000000 sec  
 d12 0.00002000 sec

===== CHANNEL f1 =====  
 NUC1 13C  
 P1 10.00 usec  
 PL1 -0.30 dB  
 SF01 100.6237959 MHz

===== CHANNEL f2 =====  
 CPDPRG2 waltz16  
 NUC2 1H  
 PCPD2 90.00 usec  
 PL2 -1.20 dB  
 PL12 14.90 dB  
 PL13 17.90 dB  
 SF02 400.1326008 MHz

F2 - Processing parameters  
 SI 32768  
 SF 100.6128183 MHz  
 WDW EM  
 SSB 0  
 LB 0.30 Hz  
 GB 0  
 PC 1.40

1D NMR plot parameters  
 CX 20.00 cm  
 F1P 220.000 ppm  
 F1 22134.82 Hz  
 F2P 0.000 ppm  
 F2 0.00 Hz  
 PPMCM 11.00000 ppm/cm  
 HZCM 1106.74109 Hz/cm

DEPT of 1j

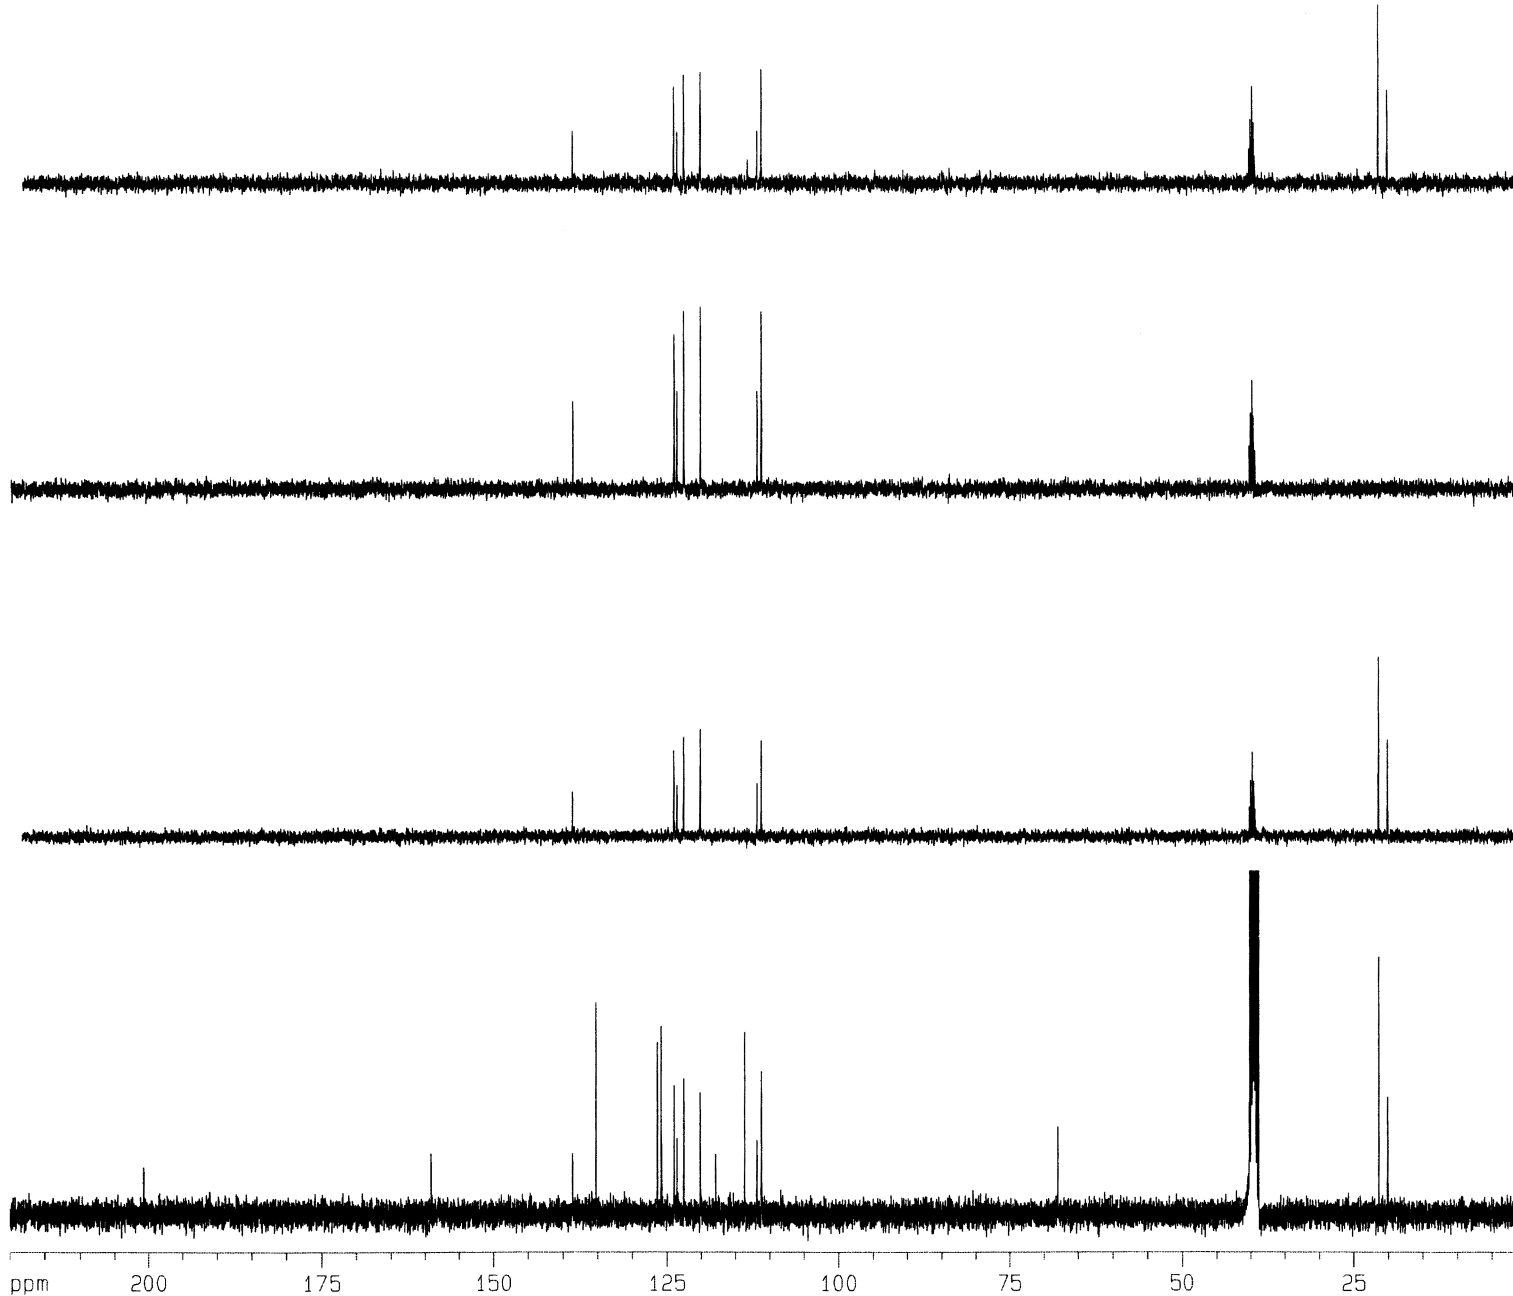

Current Data Parameters  
 NAME LTC-1-144-5ch3  
 EXPNO 2  
 PROCNO 1

F2 - Acquisition Parameters  
 Date\_ 20181001  
 Time 3.45  
 INSTRUM spect  
 PROBHD 5 mm QNP 1H  
 PULPROG zgpg30  
 TD 65536  
 SOLVENT CDCl3  
 NS 4096  
 DS 4  
 SWH 25125.629 Hz  
 FIDRES 0.383387 Hz  
 AQ 1.3042164 sec  
 RG 256  
 DW 19.900 usec  
 DE 6.50 usec  
 TE 300.0 K  
 D1 2.0000000 sec  
 d11 0.0300000 sec  
 d12 0.0000200 sec

===== CHANNEL f1 =====  
 NUC1 13C  
 P1 10.00 usec  
 PL1 -0.30 dB  
 SF01 100.6237959 MHz

===== CHANNEL f2 =====  
 CPDPRG2 waltz16  
 NUC2 1H  
 PCPD2 90.00 usec  
 PL2 -1.20 dB  
 PL12 14.90 dB  
 PL13 17.90 dB  
 SF02 400.1326008 MHz

F2 - Processing parameters  
 SI 32768  
 SF 100.6128183 MHz  
 WDW EM  
 SSB 0  
 LB 0.30 Hz  
 GB 0  
 PC 1.40

1D NMR plot parameters  
 CX 20.00 cm  
 F1P 220.000 ppm  
 F1 22134.82 Hz  
 F2P 0.000 ppm  
 F2 0.00 Hz  
 PPMCM 11.00000 ppm/cm  
 HZCM 1106.74109 Hz/cm

1H NMR (CDCl3, 500 Hz) of compound 3

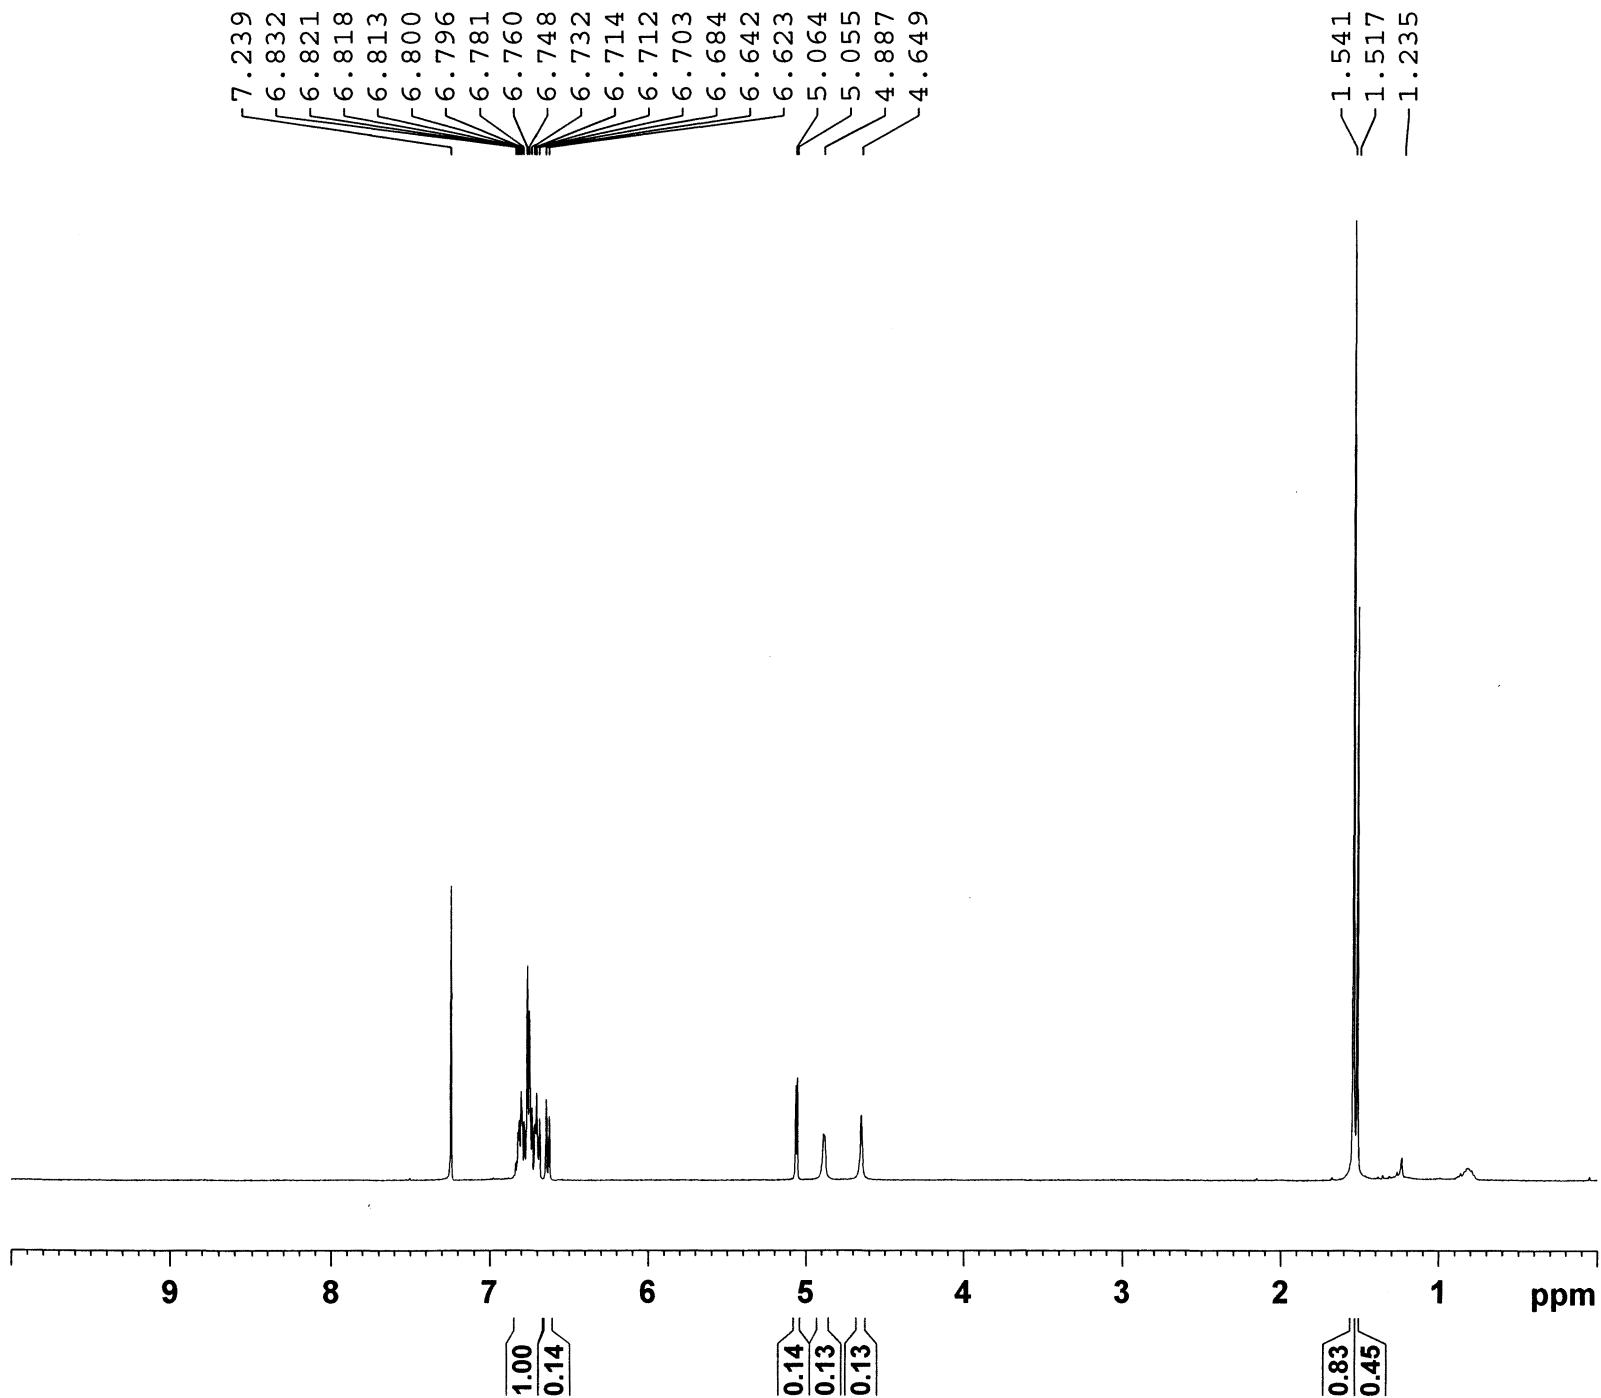

Current Data Parameters  
 NAME LTC-1-129-f1  
 EXPNO 1  
 PROCNO 1

F2 - Acquisition Parameters  
 Date\_ 20180830  
 Time 17.29 h  
 INSTRUM spect  
 PROBHD Z108618\_0922 (  
 PULPROG zg30  
 TD 32768  
 SOLVENT CDCl3  
 NS 32  
 DS 0  
 SWH 8012.820 Hz  
 FIDRES 0.489064 Hz  
 AQ 2.0447233 sec  
 RG 210.28  
 DW 62.400 usec  
 DE 16.43 usec  
 TE 297.8 K  
 D1 2.00000000 sec  
 TD0 1  
 SFO1 400.1324008 MHz  
 NUC1 1H  
 P1 14.50 usec  
 PLW1 12.5000000 W

F2 - Processing parameters  
 SI 16384  
 SF 400.1300173 MHz  
 WDW EM  
 SSB 0  
 LB 0 Hz  
 GB 0  
 PC 1.00

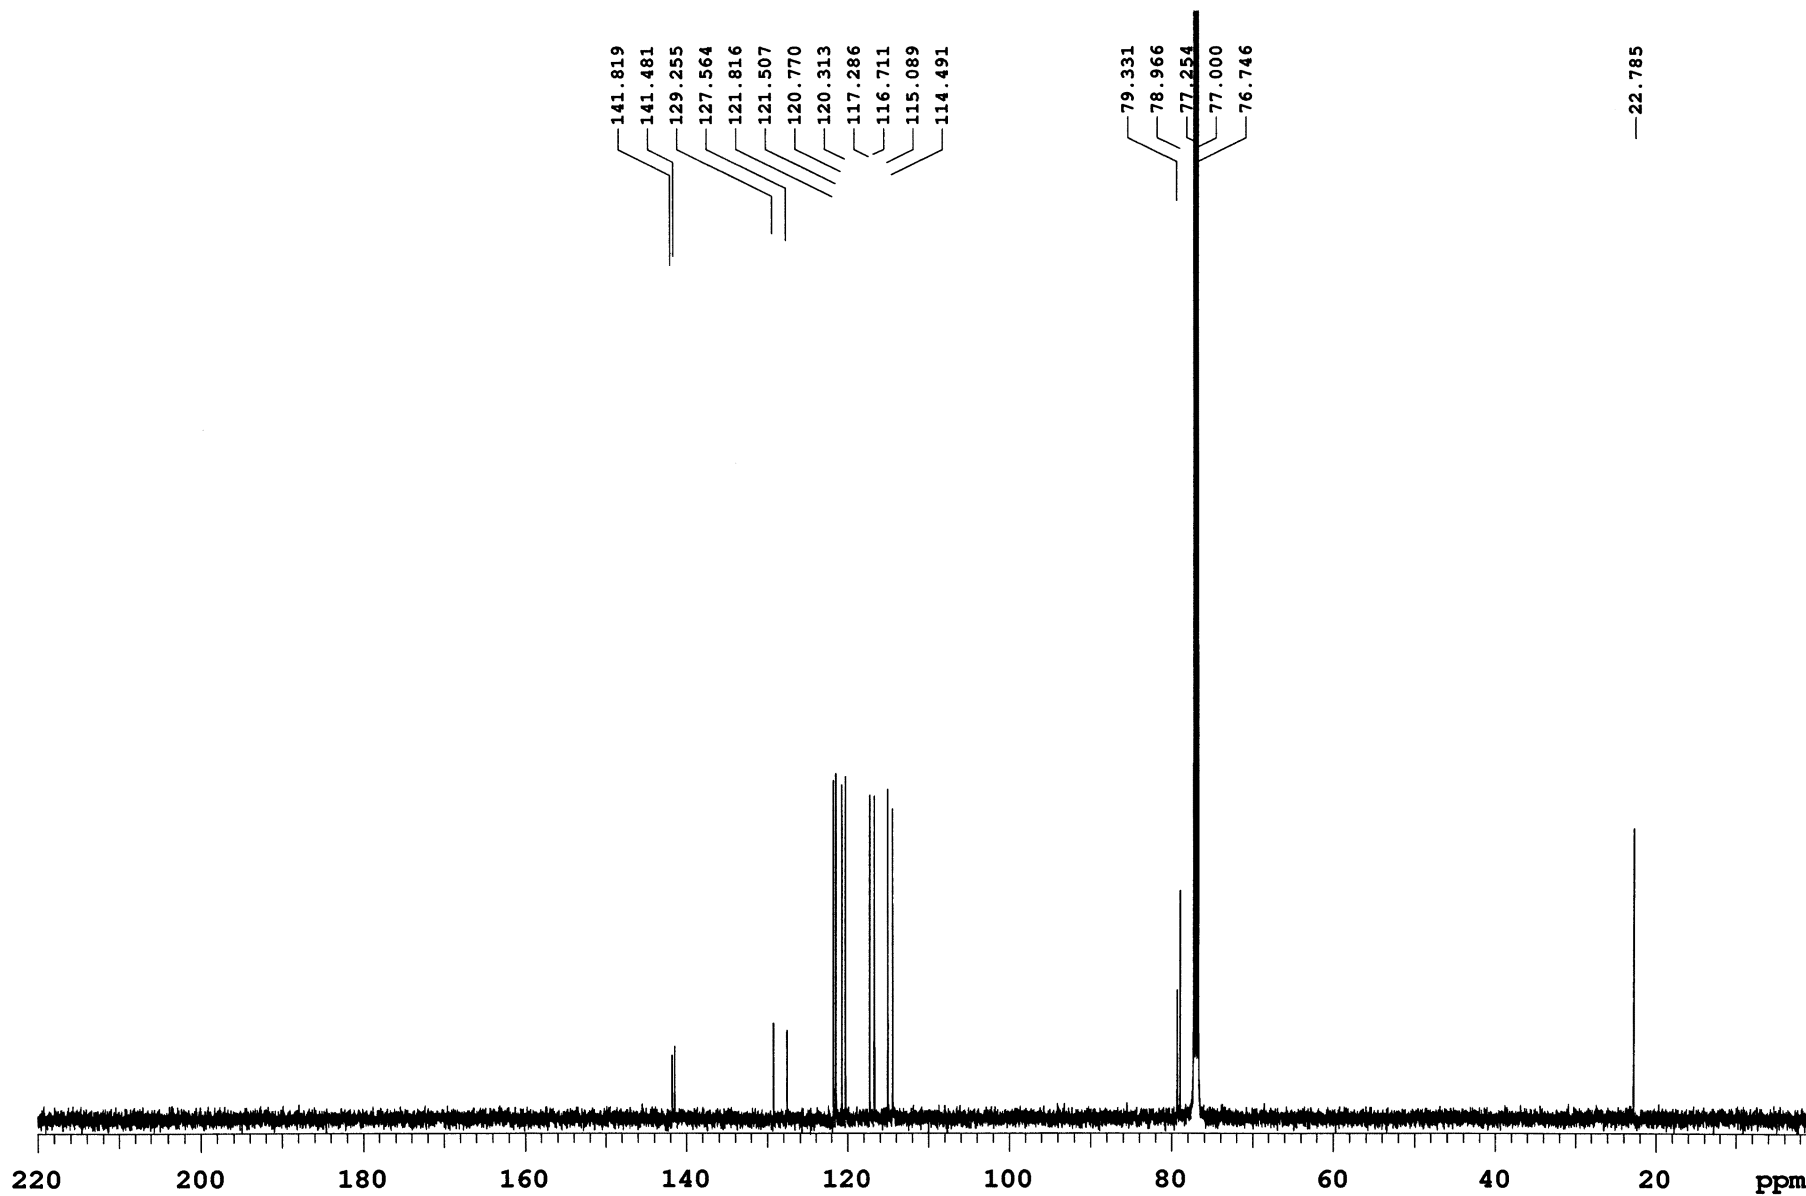

13C NMR (CDCl3, 125 Hz) of compound 3

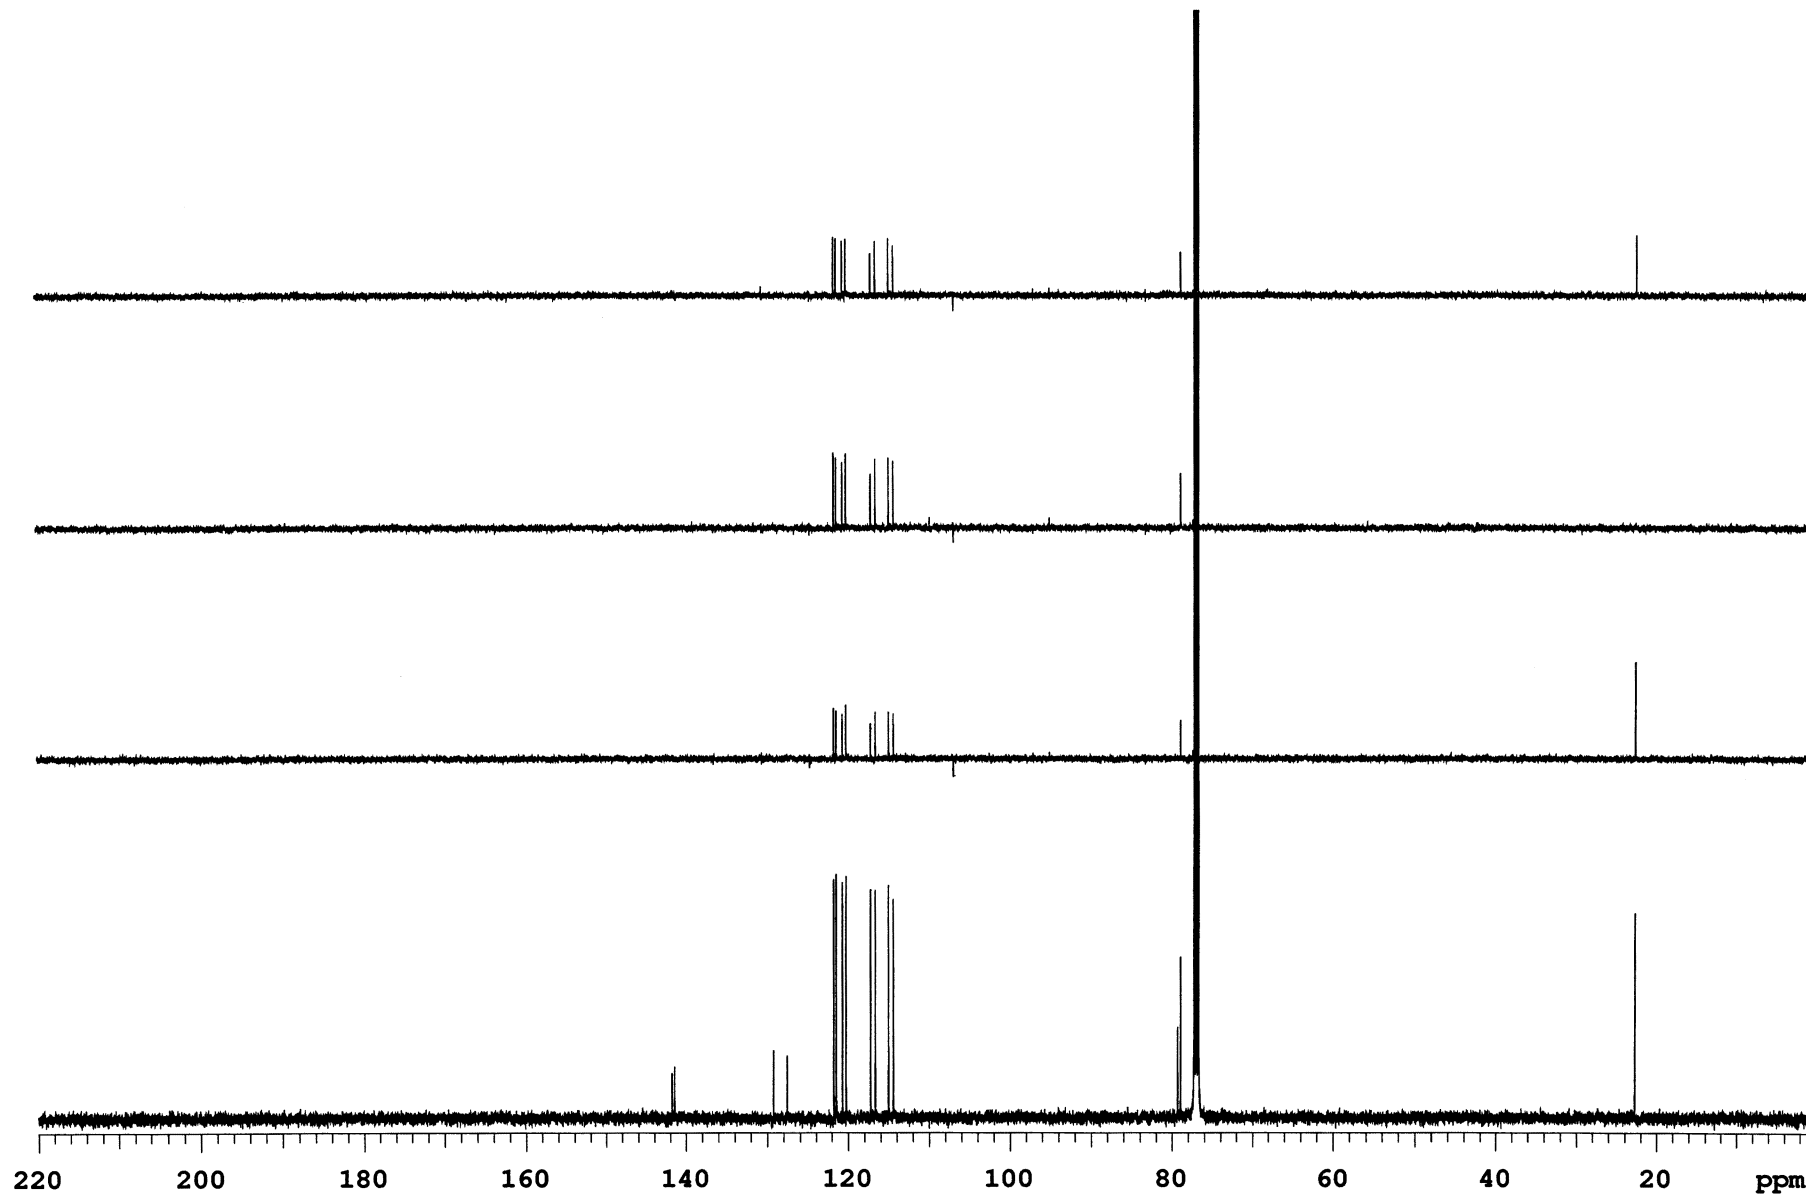

DEPT of compound 3



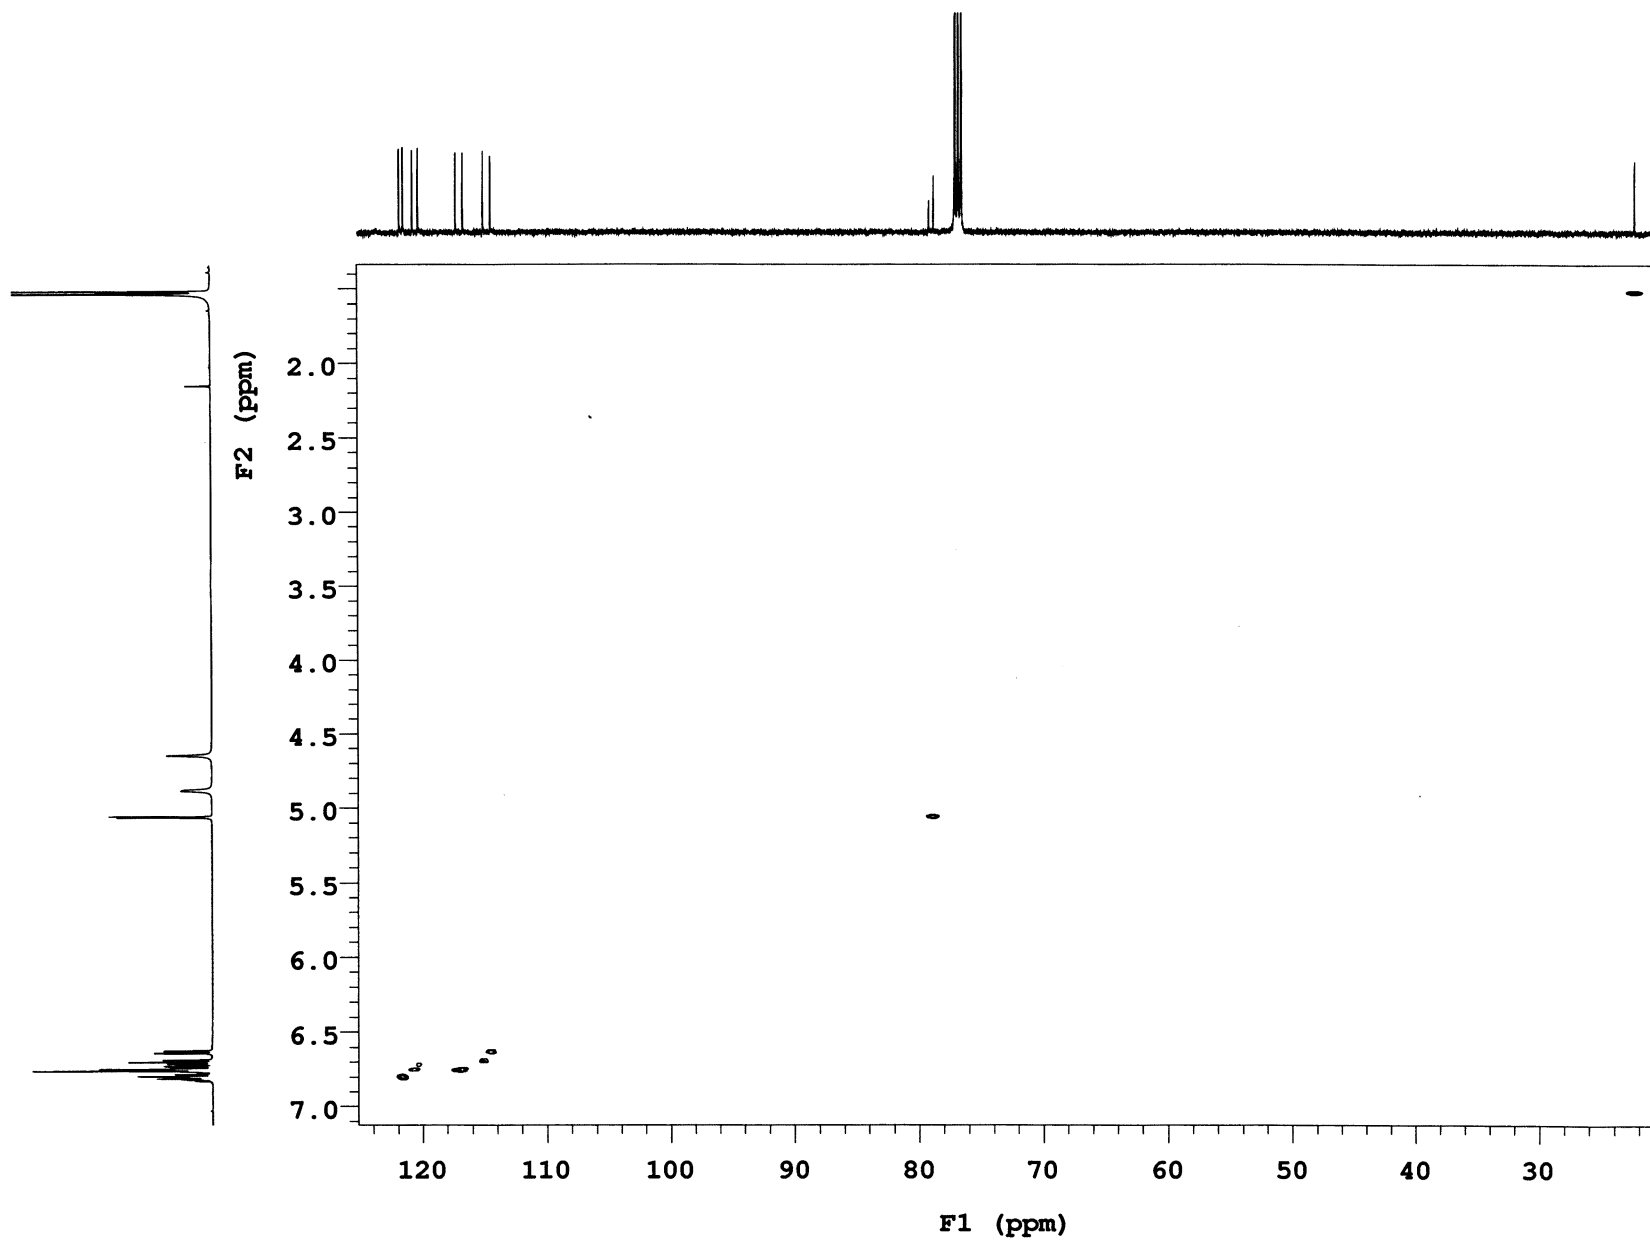

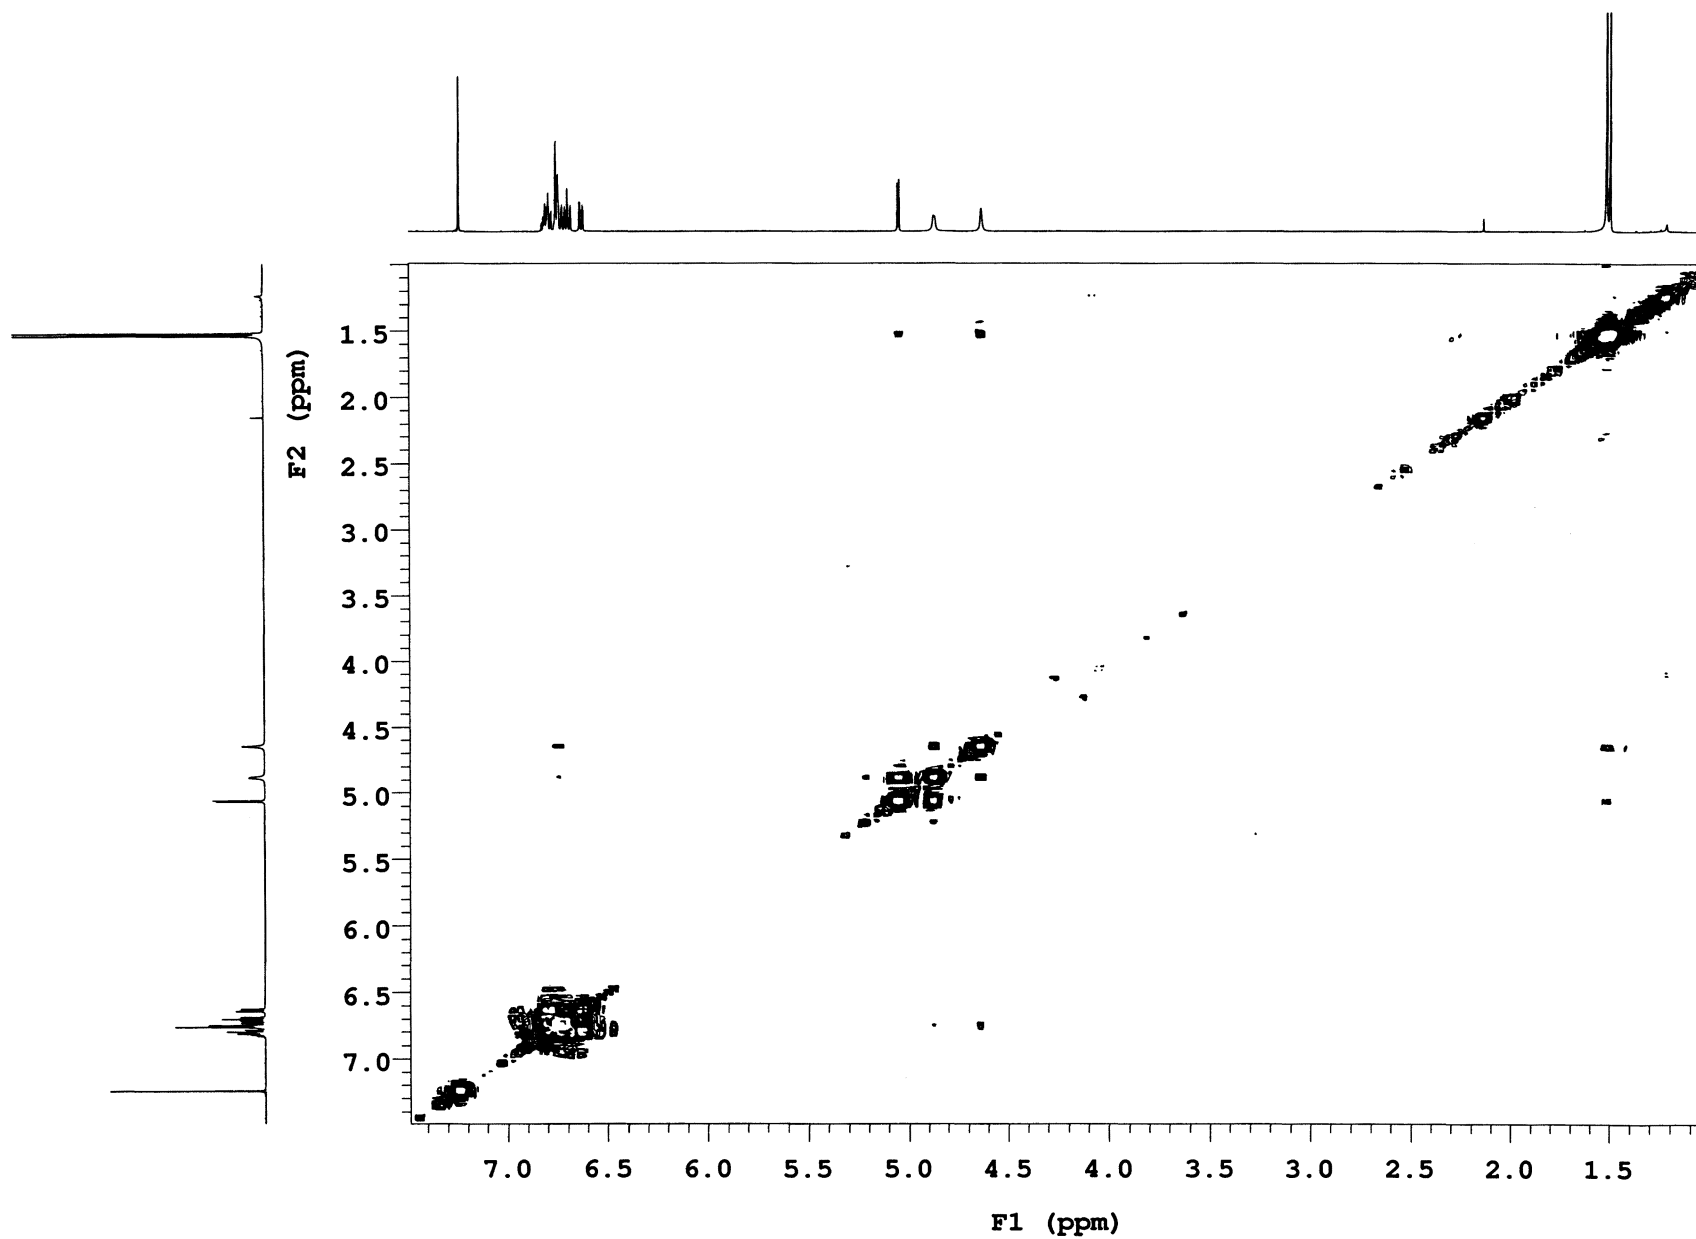

COSY of compound 3

Sample Name **LTC-0-129-f1**  
Date collected **2018-09-05**

Pulse sequence **gCOSY**  
Solvent **cdcl3**

Temperature **25**  
Spectrometer **Agilent-NMR-inova500**

Study owner **vnmr2**  
Operator **vnmr2**

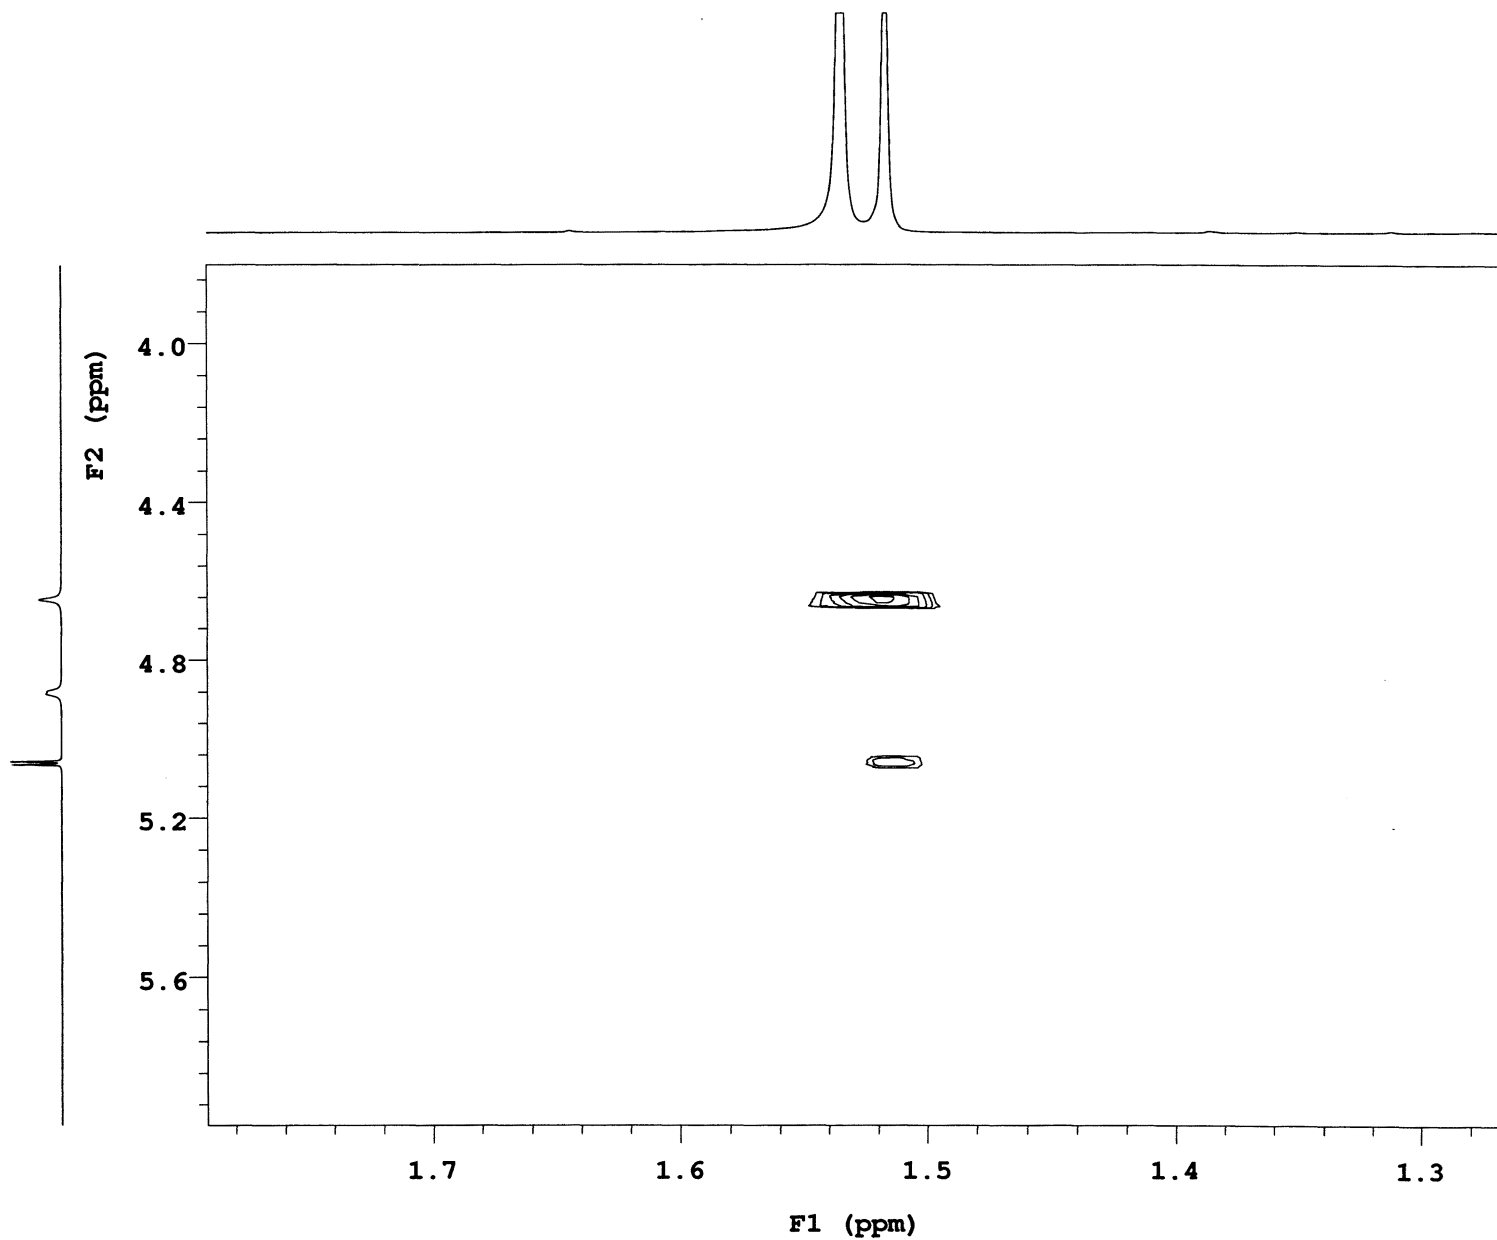

COSY of compound 3, expanded

Sample Name **LTC-0-129-f1**  
Date collected **2018-09-05**

Pulse sequence **NOESY**  
Solvent **cdcl3**

Temperature **25**  
Spectrometer **Agilent-NMR-inova500**

Study owner **vnmr2**  
Operator **vnmr2**

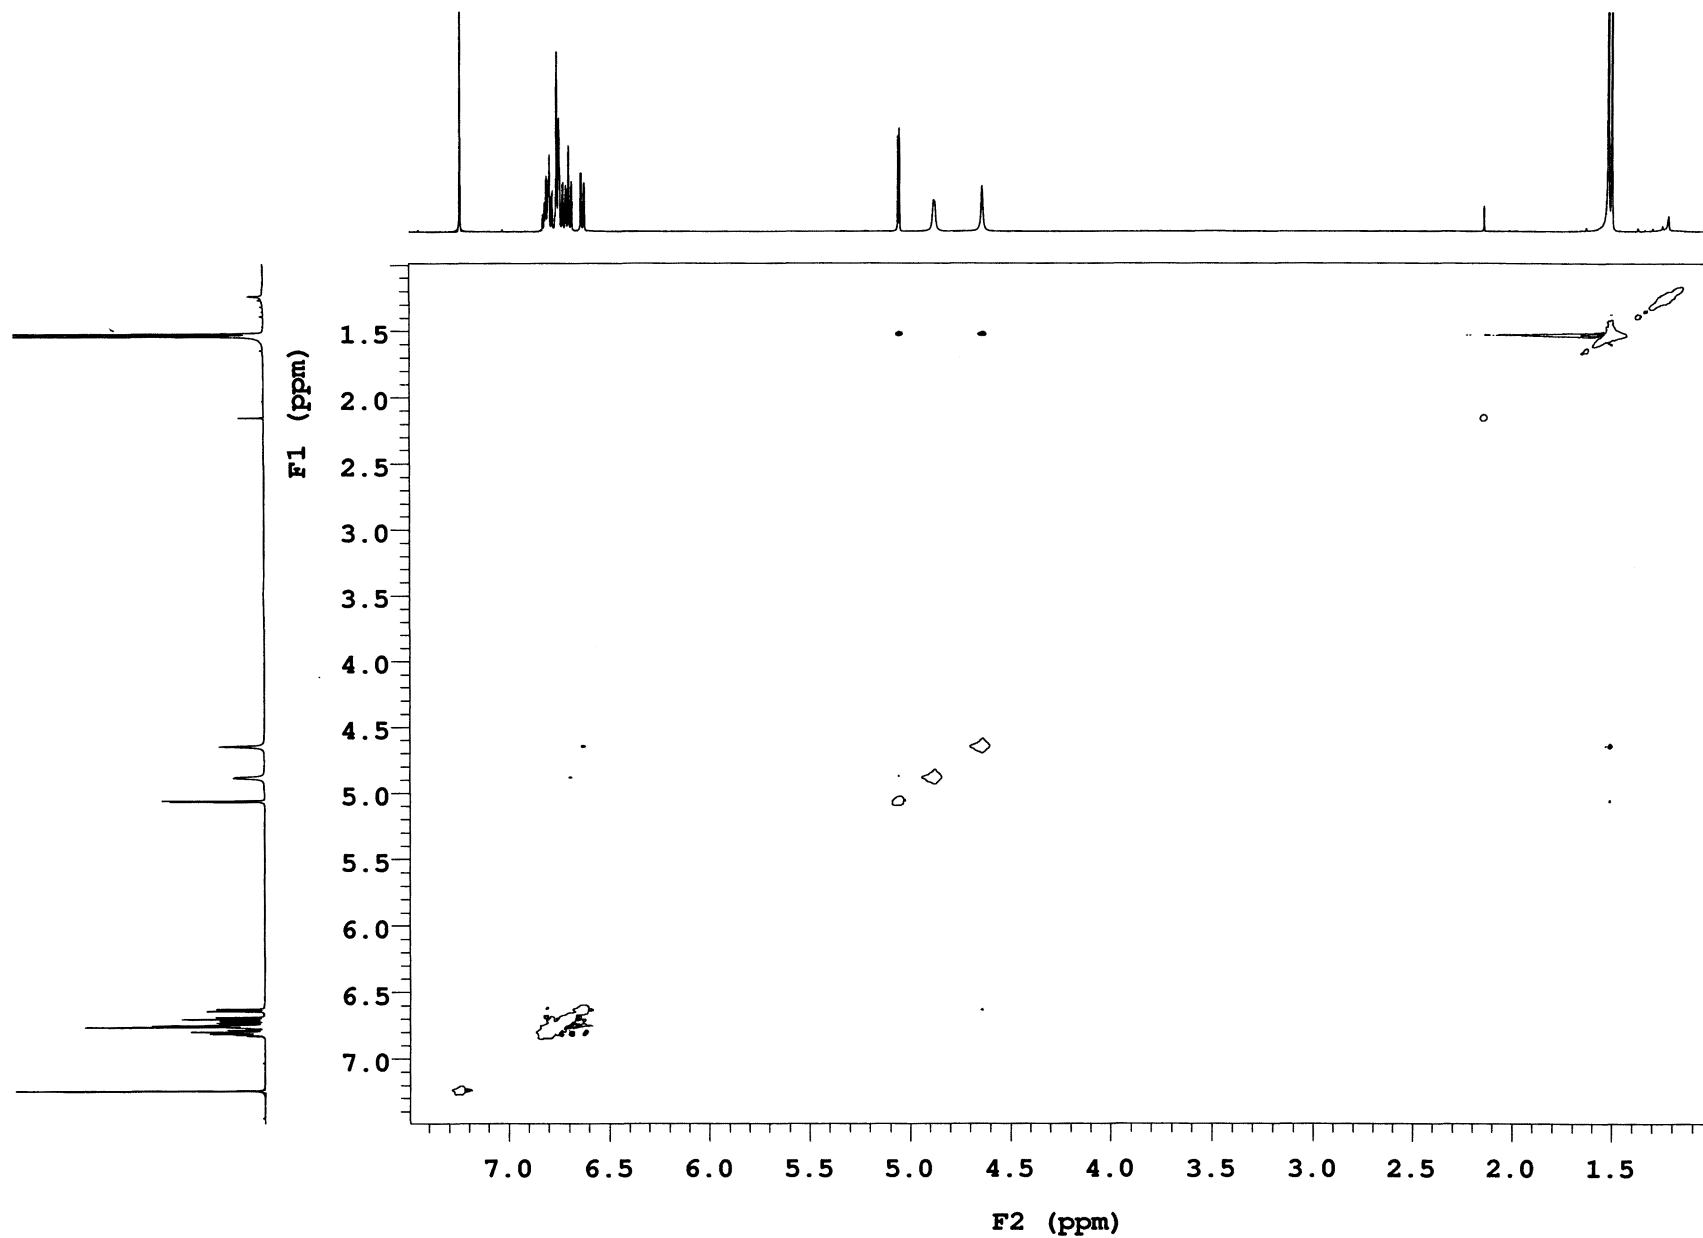

NOESY of compound 3

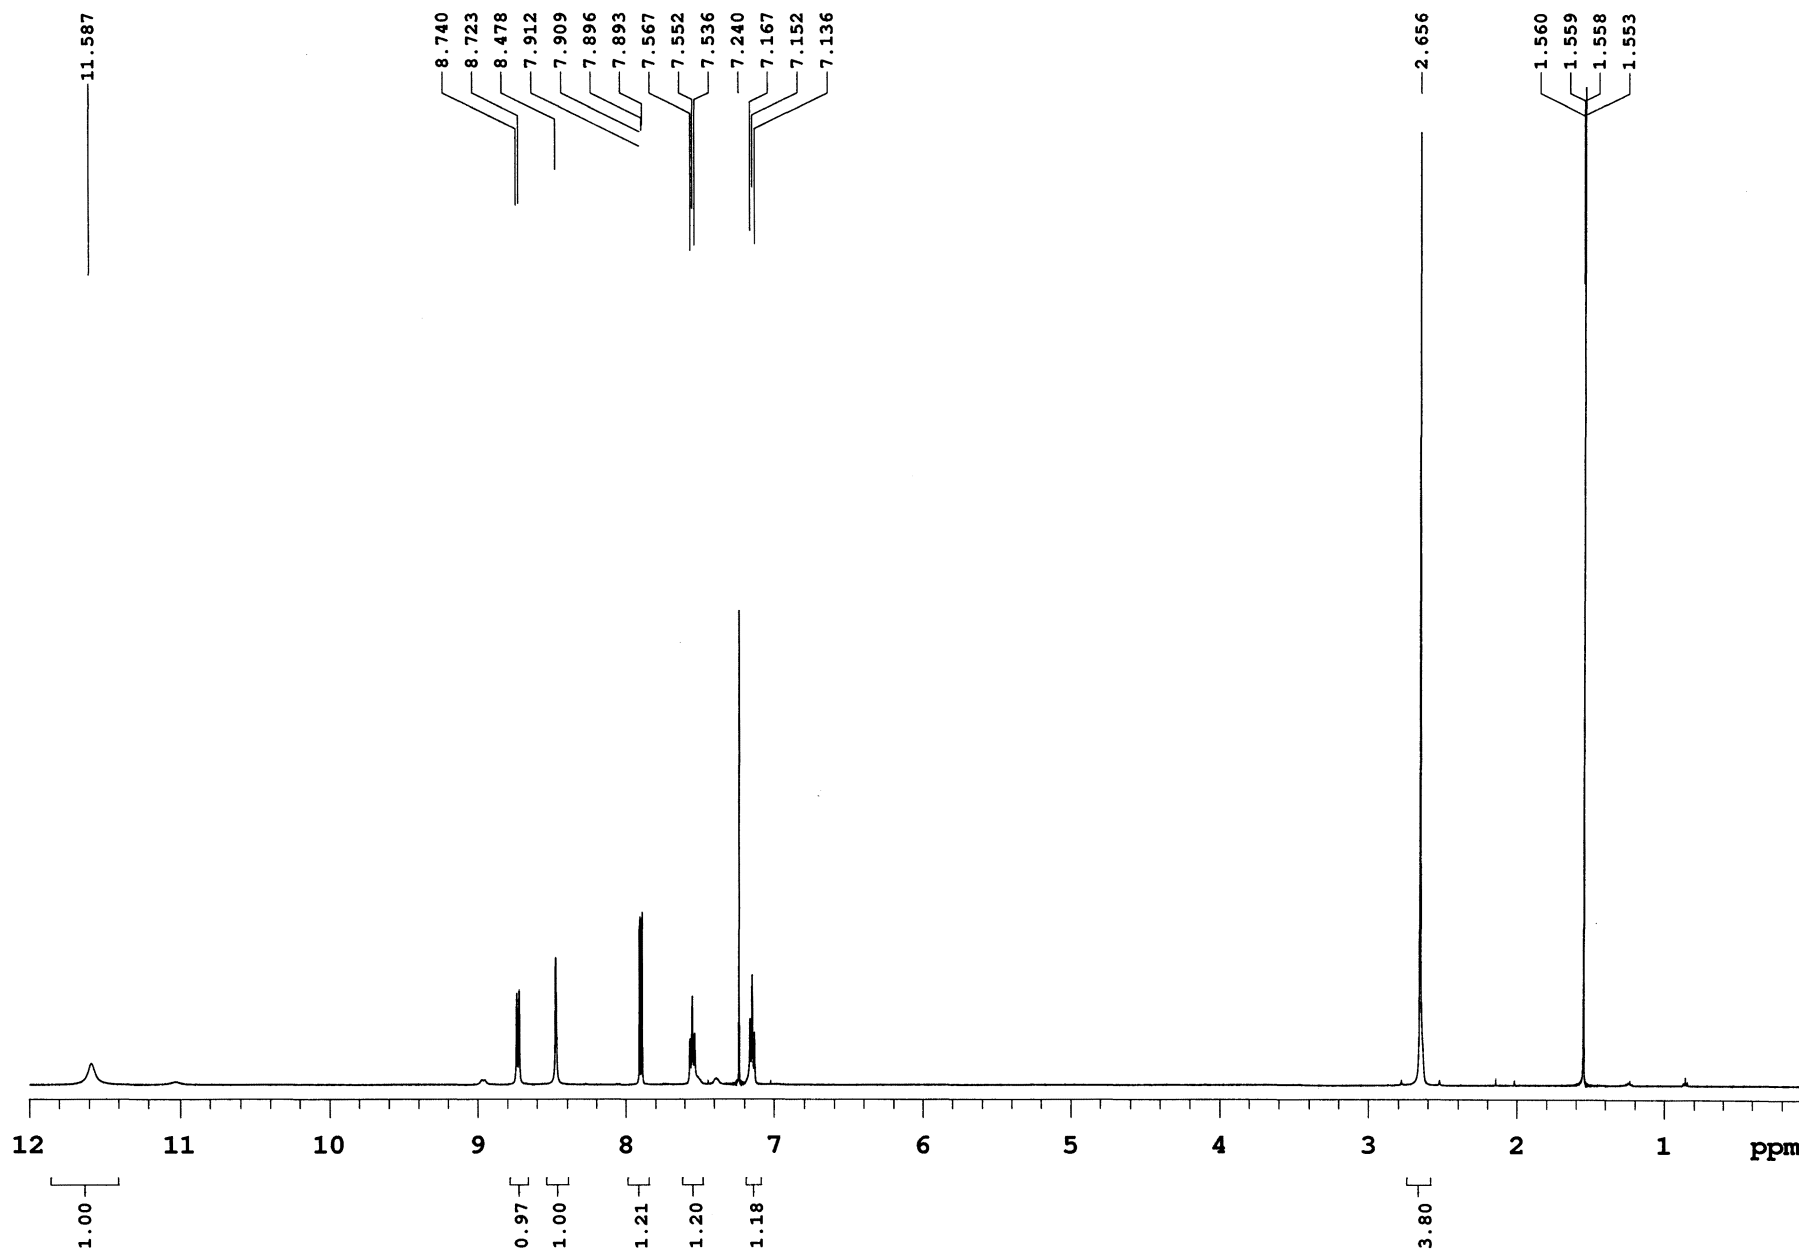1H NMR (CDCl<sub>3</sub>, 500 Hz) of compound 4

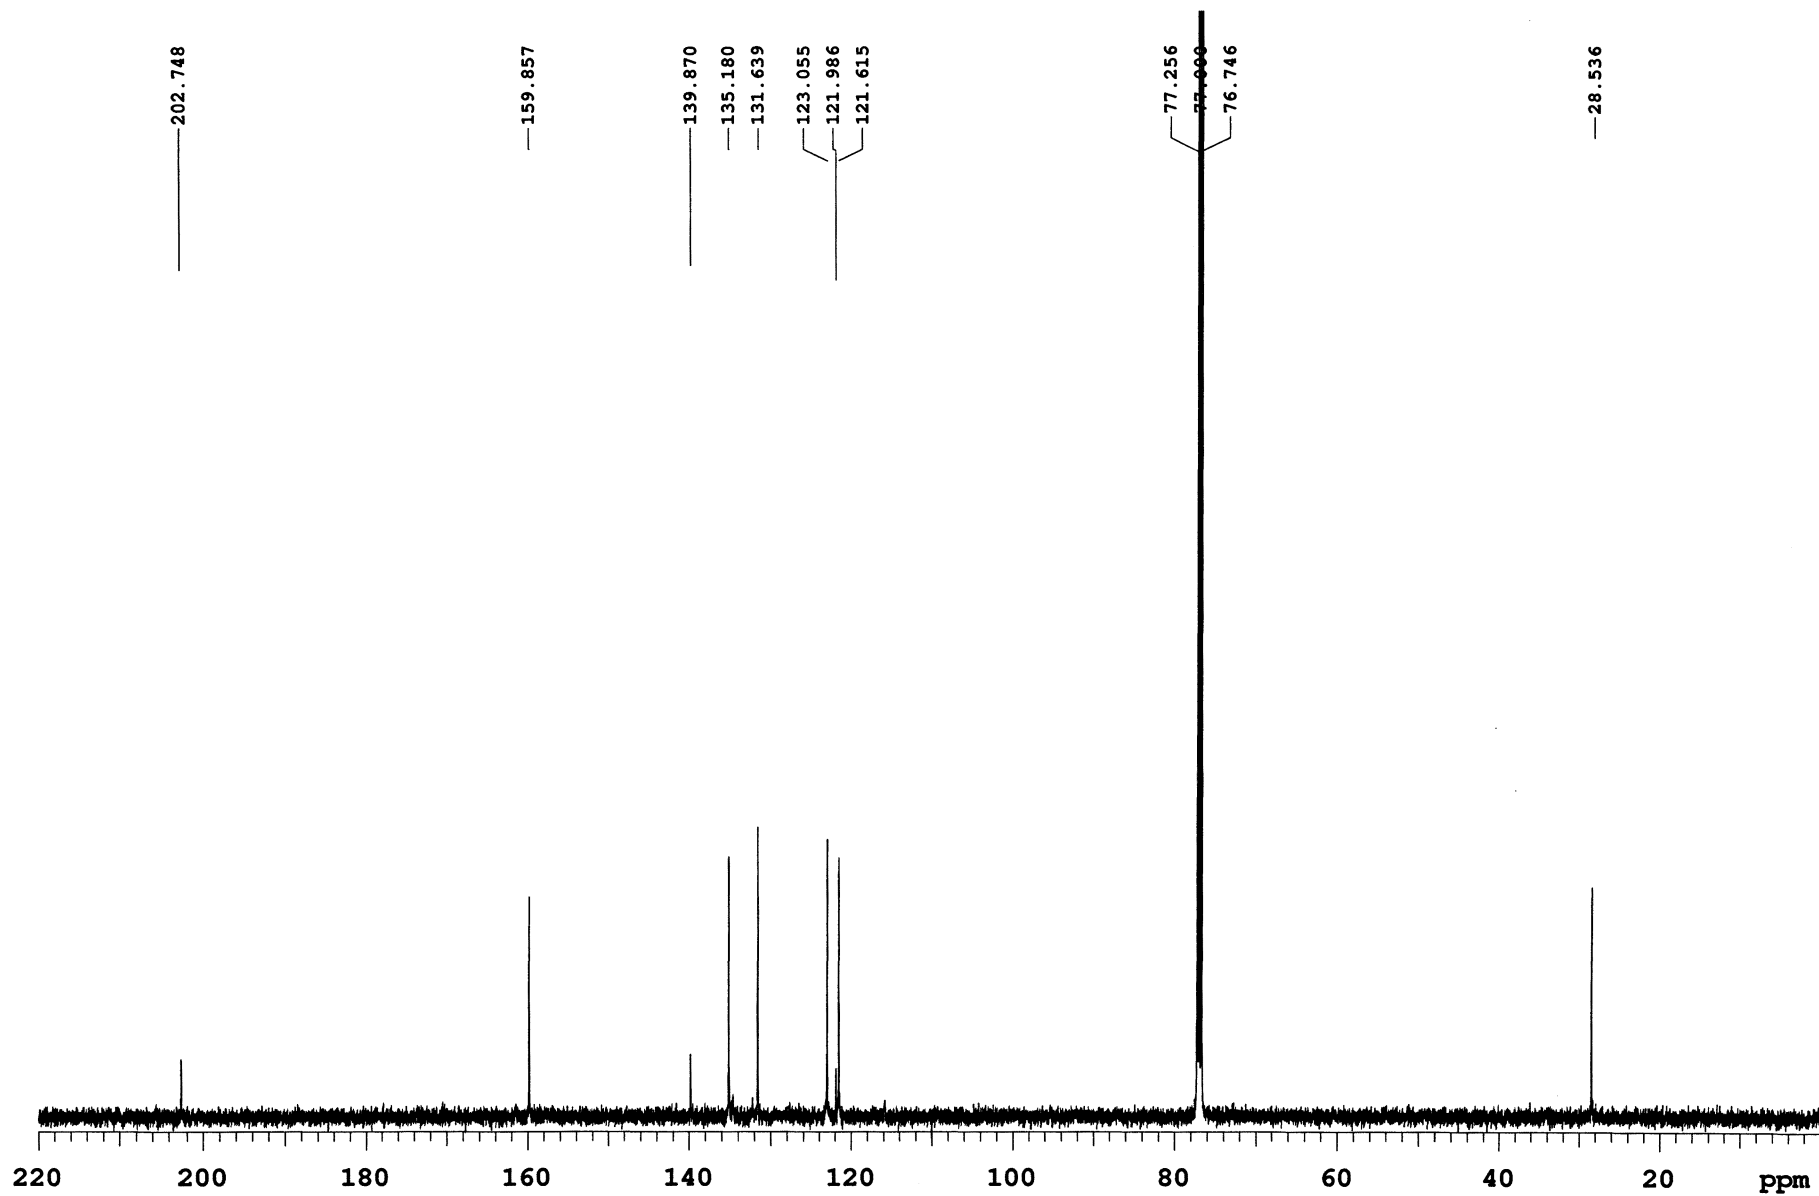13C NMR (CDCl<sub>3</sub>, 500 Hz) of compound 4

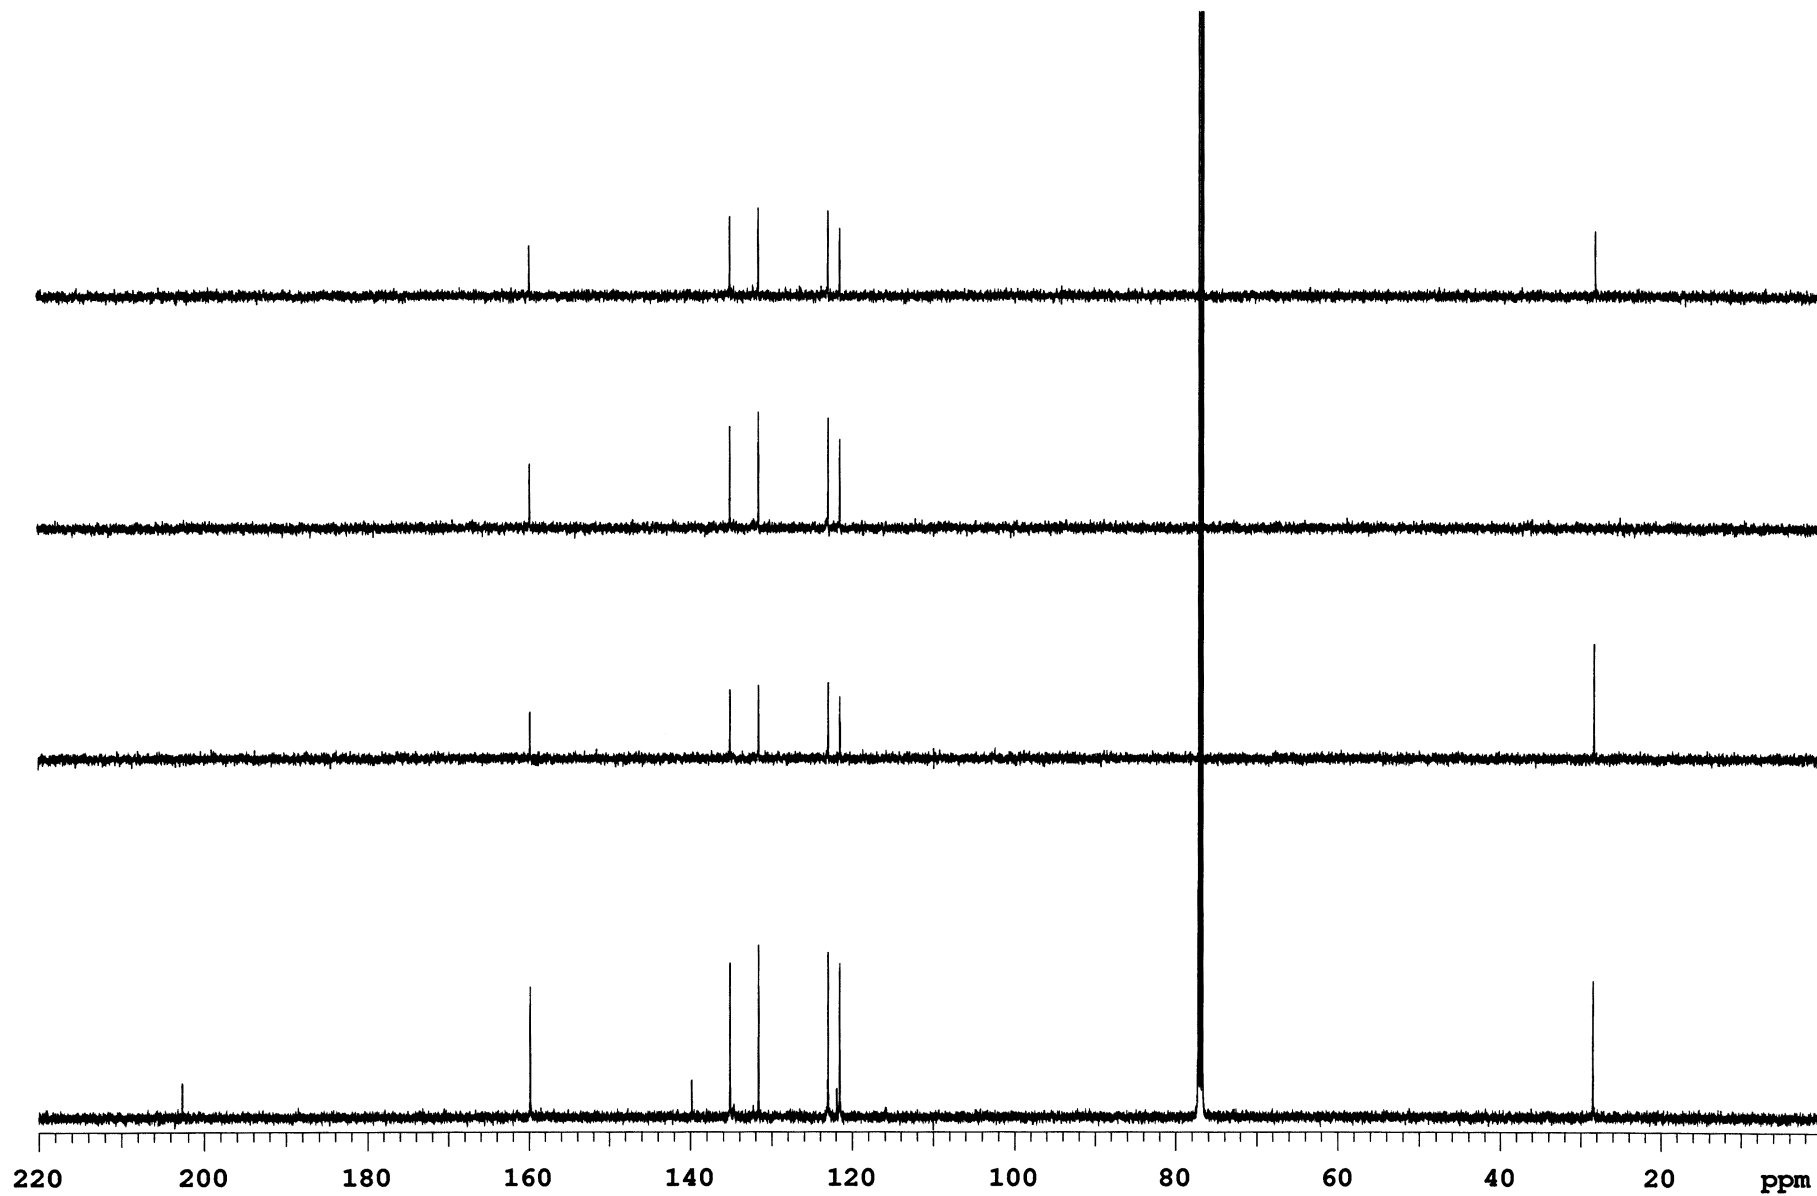

DEPT of compound 4

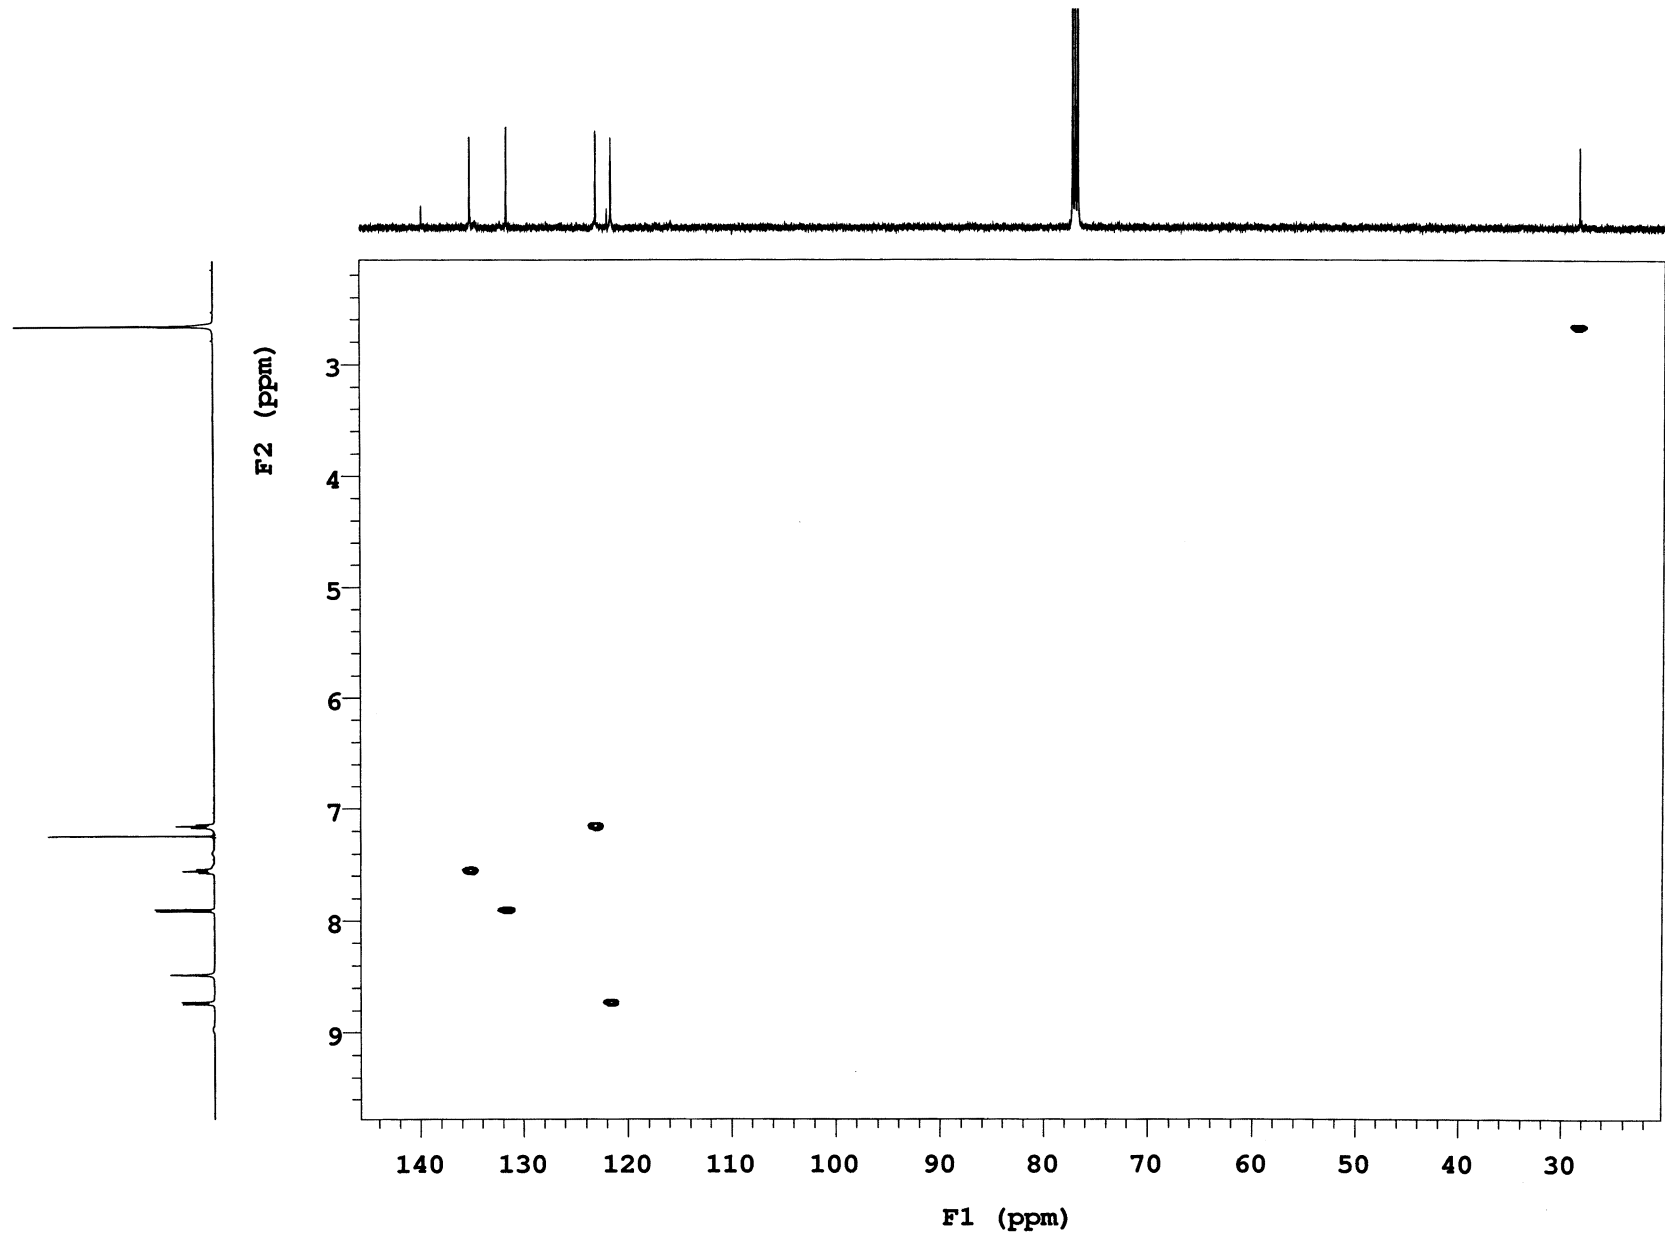



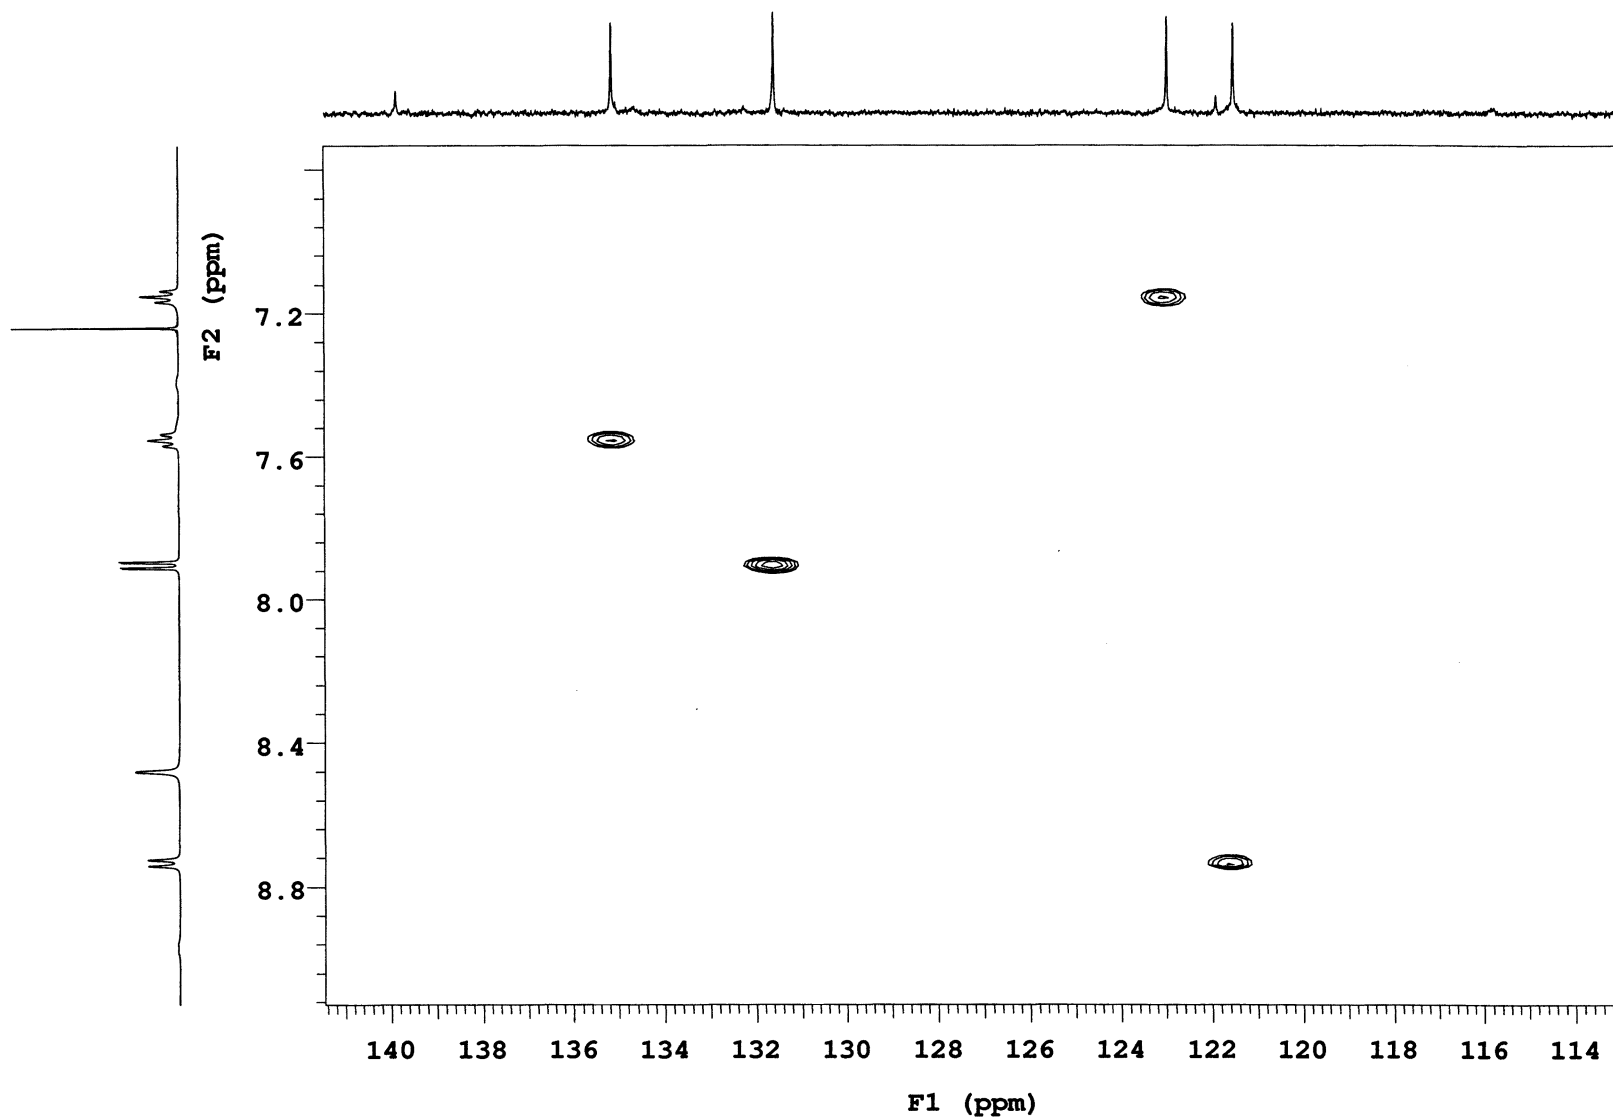

Sample Name LTC-2-202-f2  
Date collected 2018-12-08

Pulse sequence gCOSY  
Solvent cdcl3

Temperature 25  
Spectrometer Agilent-NMR-inova500

Study owner vnmr2  
Operator vnmr2

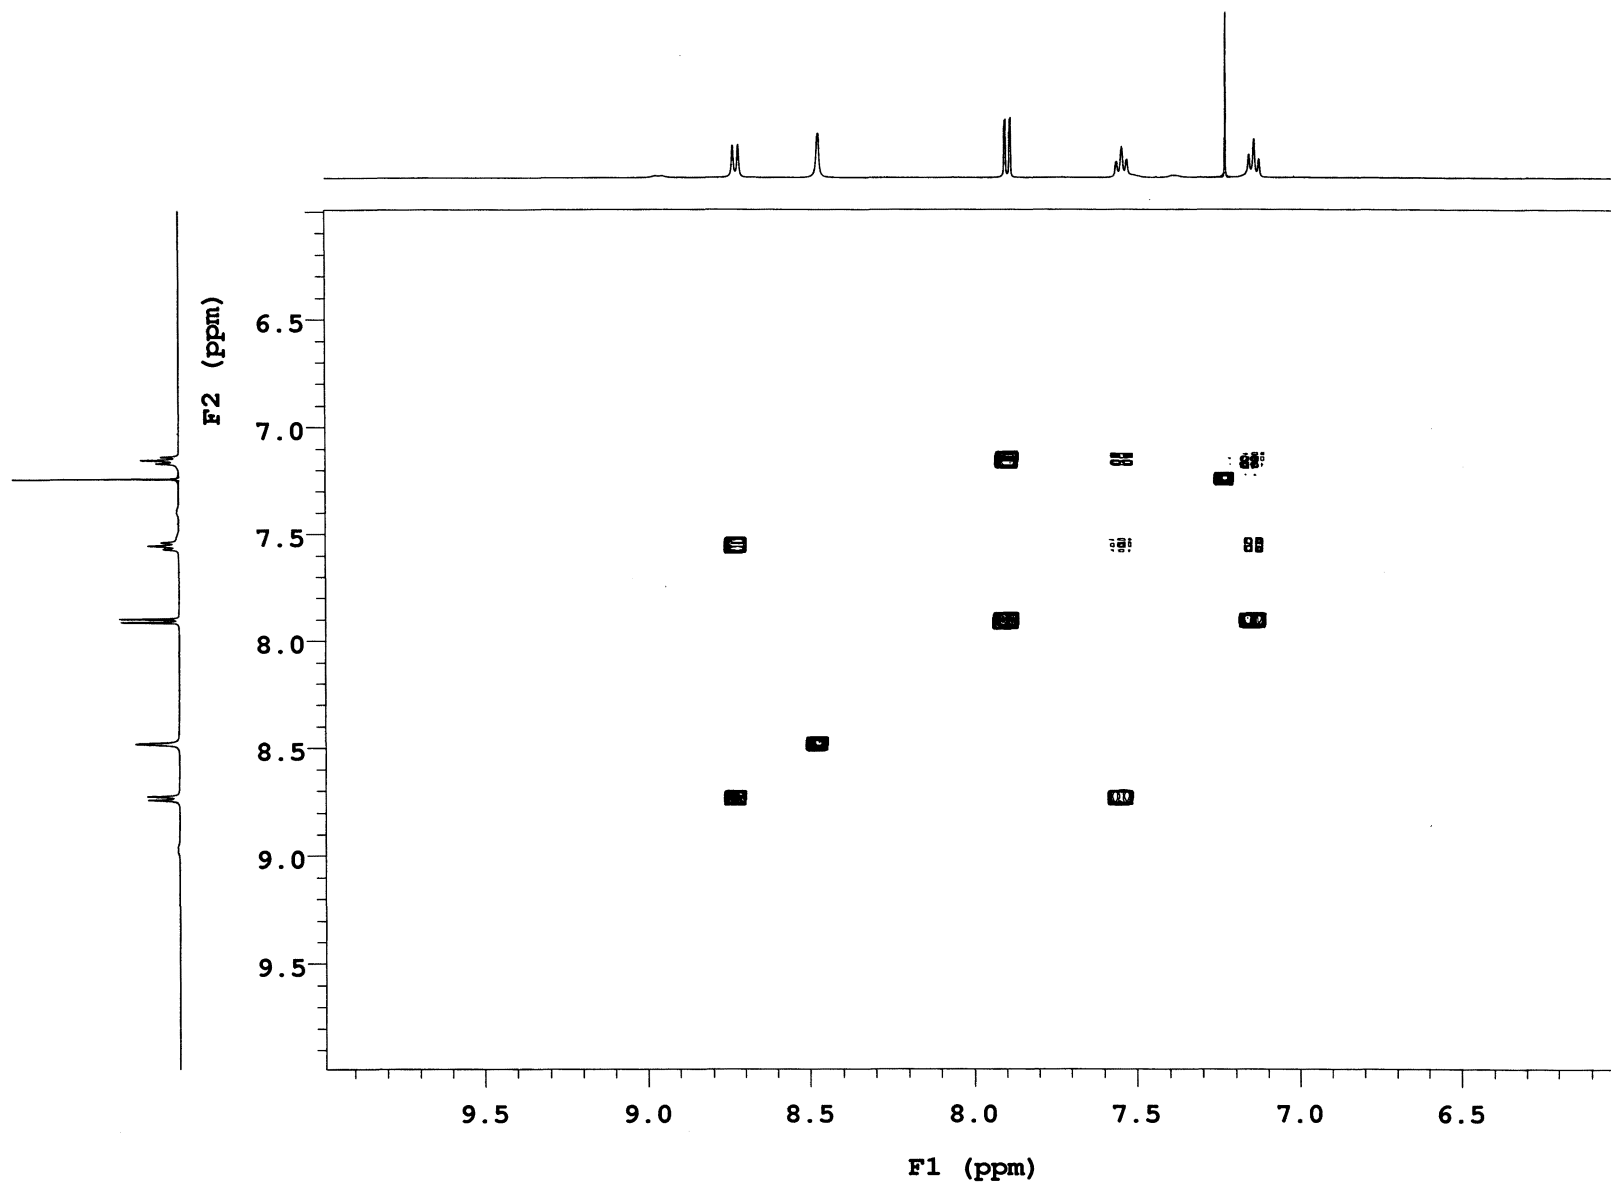

COSY of compound 4

Sample Name **LTC-2-202-f2**  
Date collected **2018-12-08**

Pulse sequence **NOESY**  
Solvent **cdcl3**

Temperature **25**  
Spectrometer **Agilent-NMR-inova500**

Study owner **vnmr2**  
Operator **vnmr2**

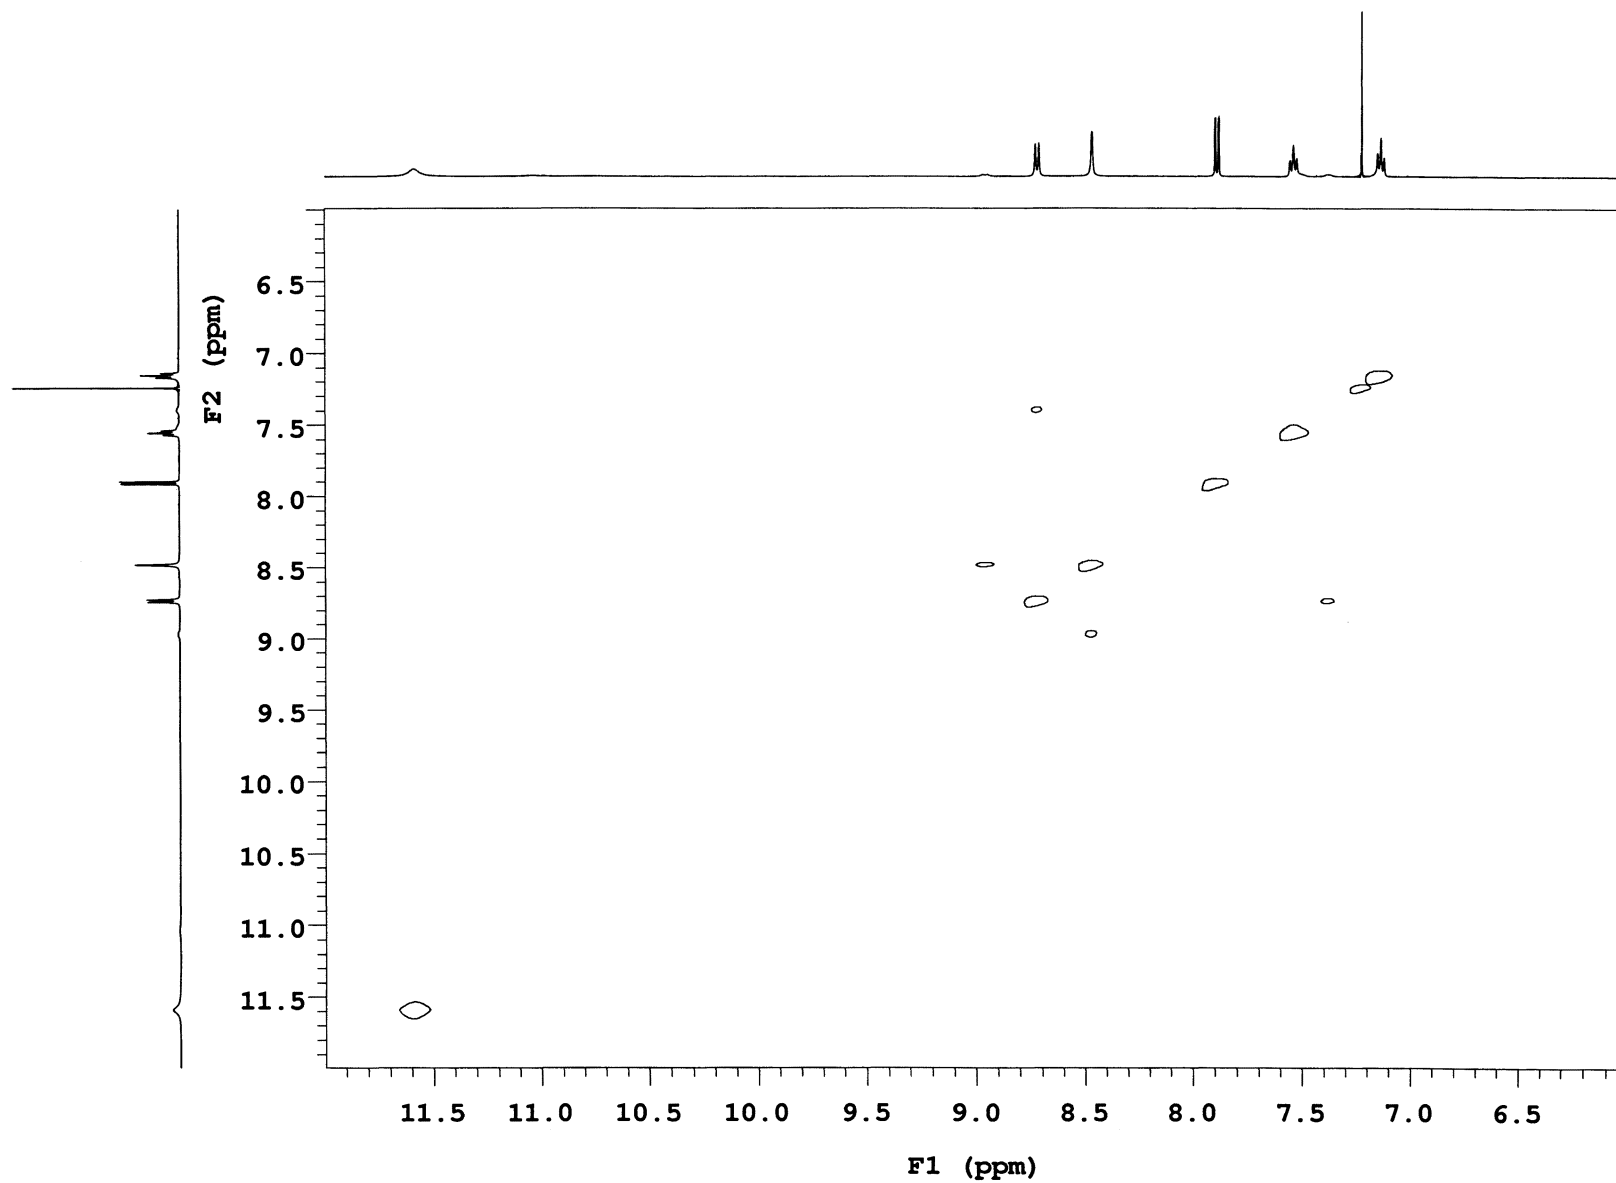

NOESY of compound 4

Sample Name **SQL-050**  
Date collected **2020-04-19**

Pulse sequence **PROTON**  
Solvent **cdcl3**

Temperature **25**  
Spectrometer **Agilent-NMR-inova500**

Study owner **vnmr2**  
Operator **vnmr2**

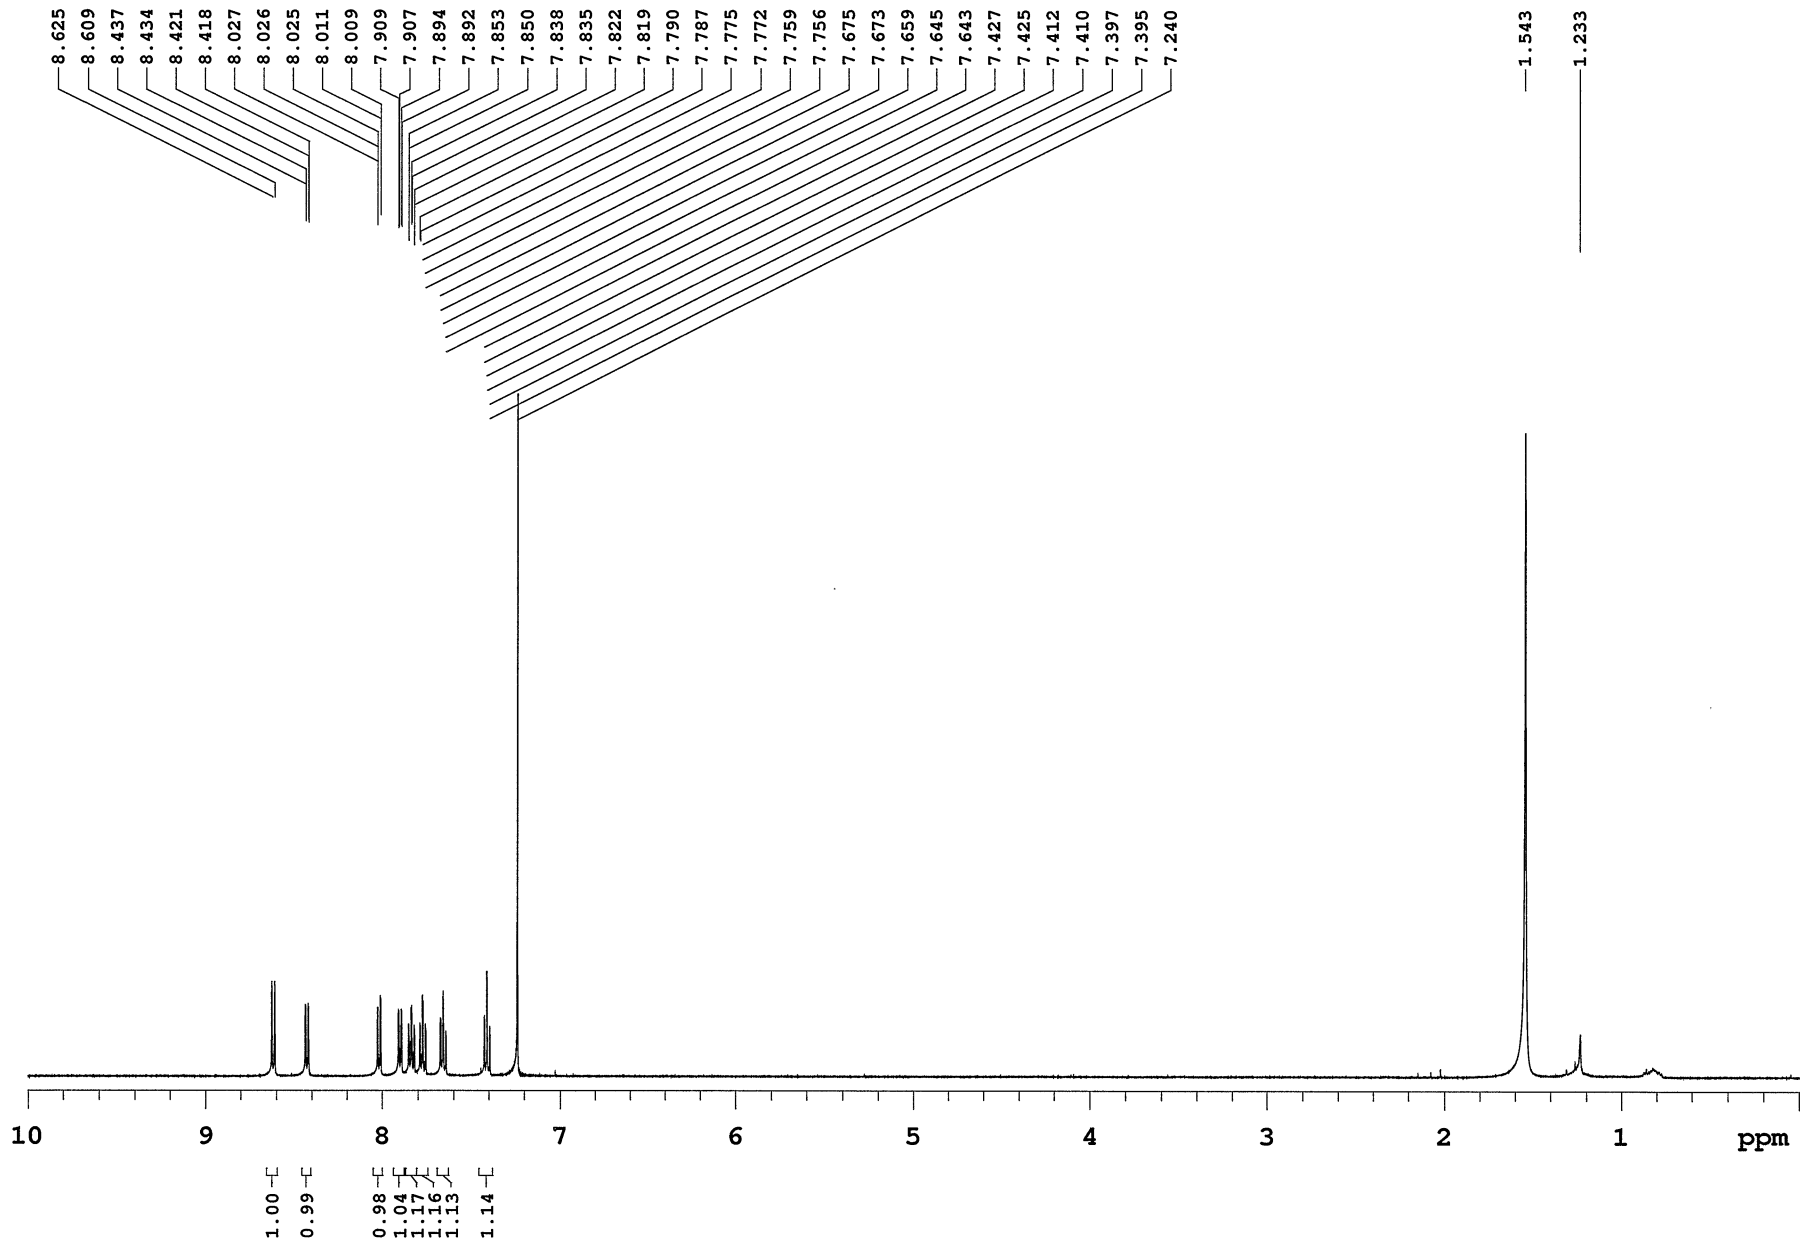

1H NMR (CDCl<sub>3</sub>, 500 Hz) of tryptanthrin

Sample Name **SQL-050**  
Date collected **2020-04-19**

Pulse sequence **CARBON**  
Solvent **cdcl3**

Temperature **25**  
Spectrometer **Agilent-NMR-inova500**

Study owner **vnmr2**  
Operator **vnmr2**

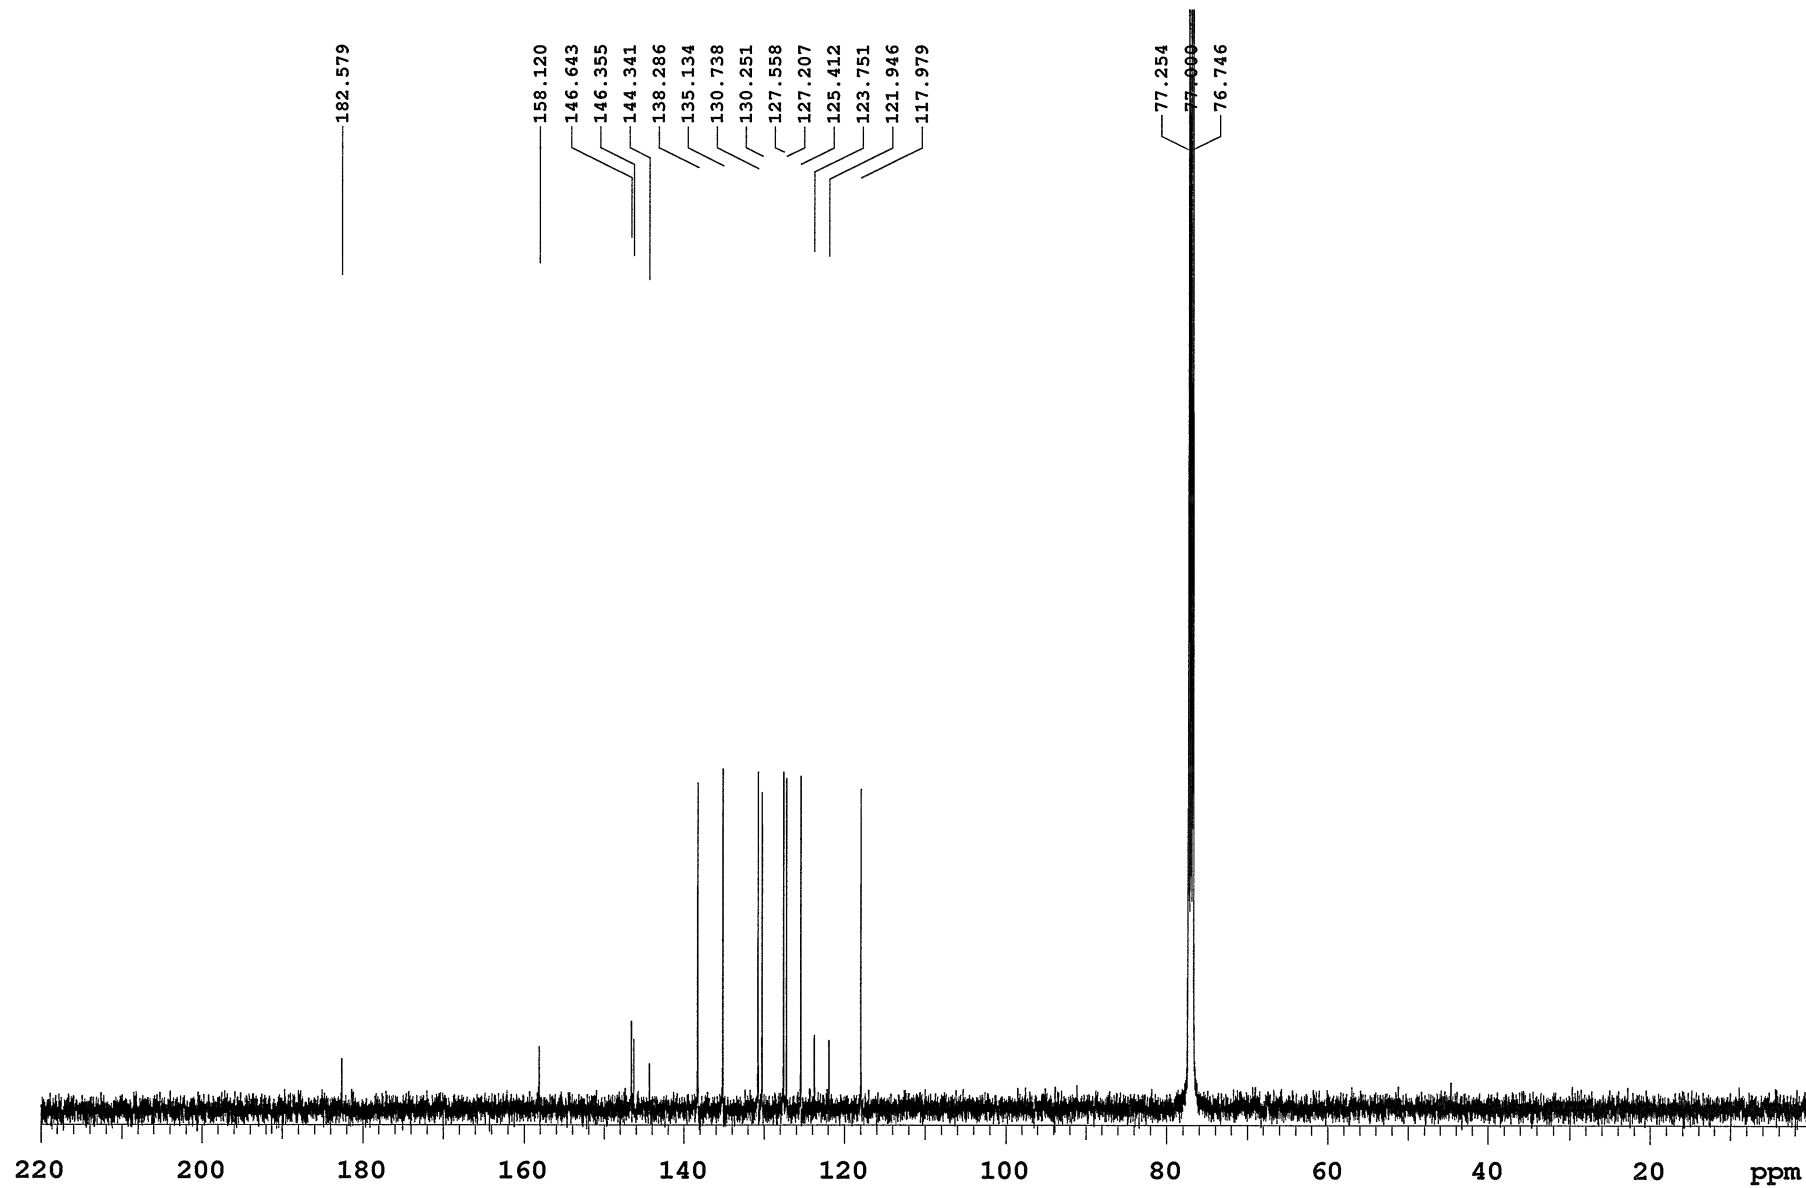

13C NMR (CDCl<sub>3</sub>, 125 Hz) of tryptanthrin

Sample Name **SQL-050**  
Date collected **2020-04-20**

Pulse sequence **DEPT**  
Solvent **cdcl3**

Temperature **25**  
Spectrometer **Agilent-NMR-inova500**

Study owner **vnmr2**  
Operator **vnmr2**

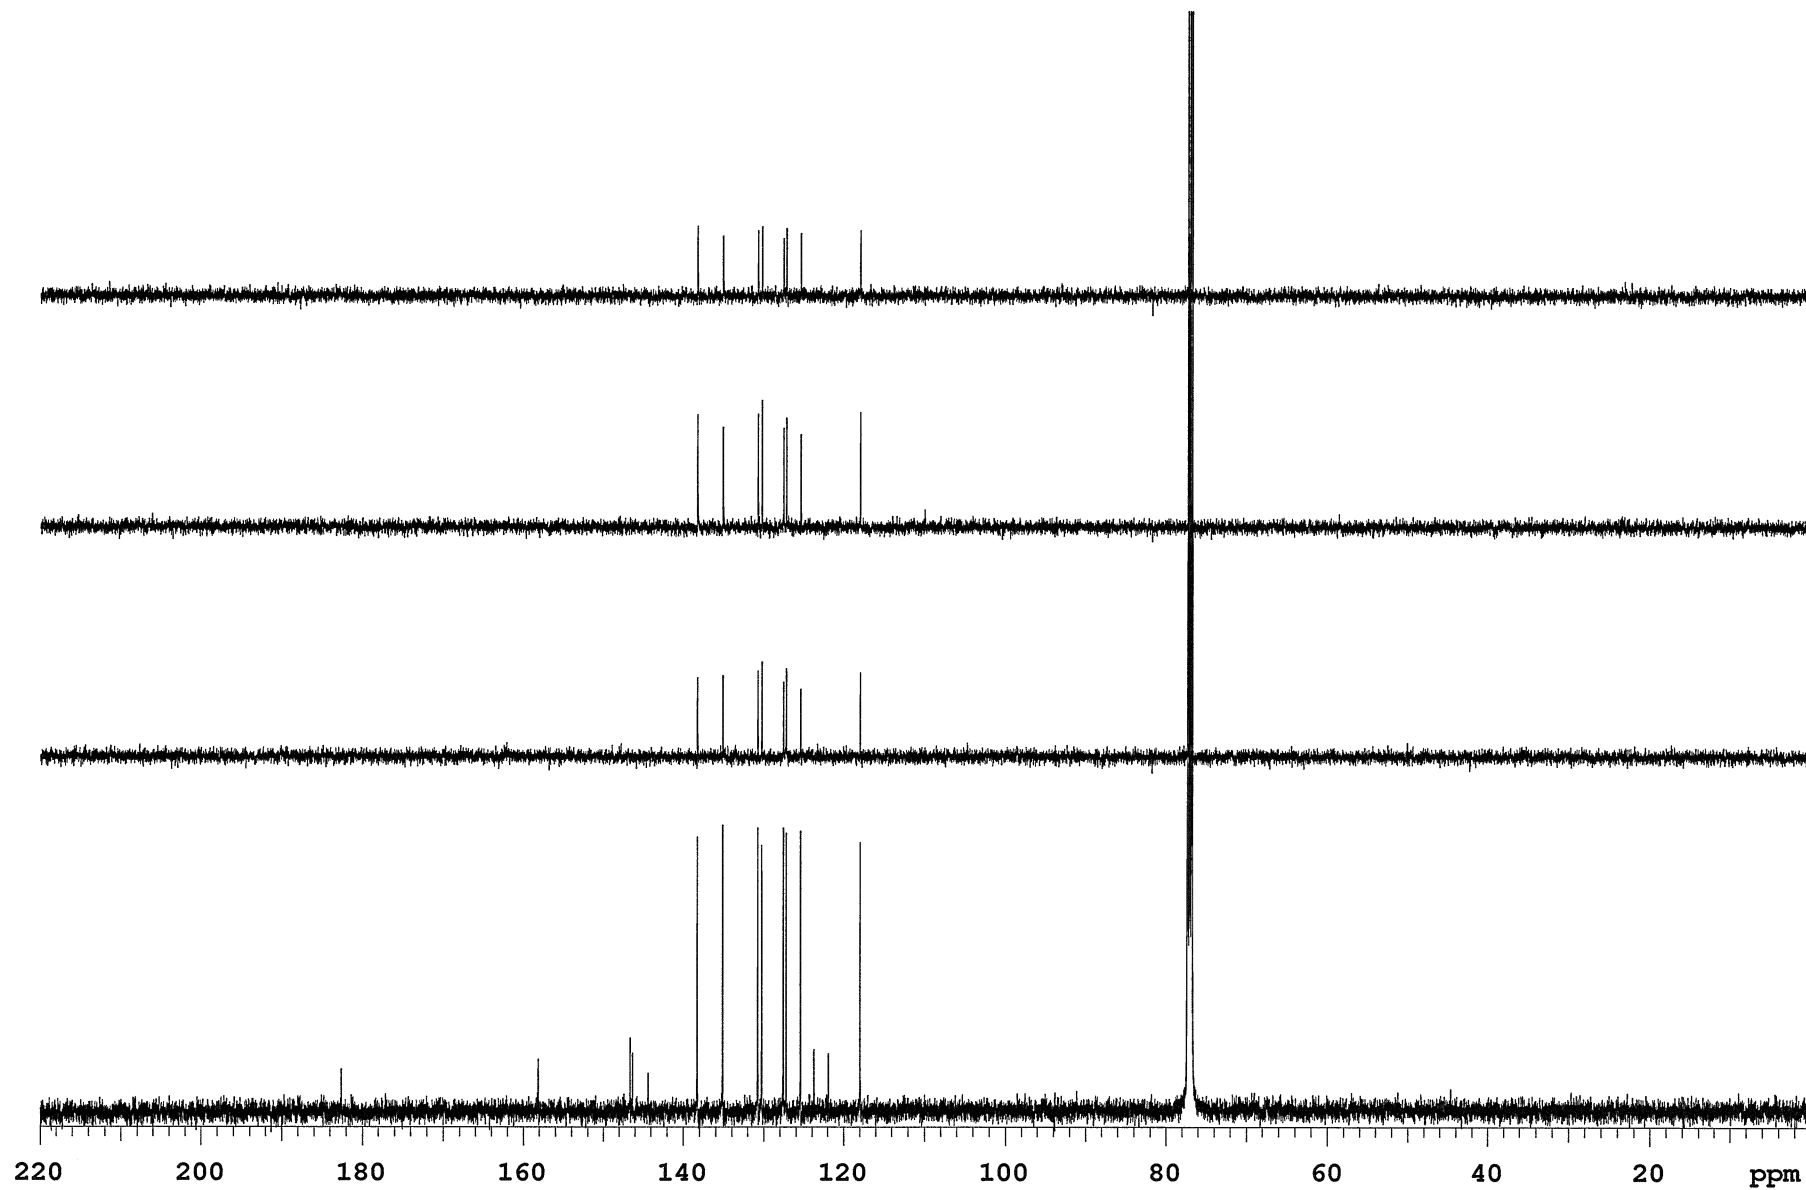

DEPT of tryptanthrin

Sample Name **SQL-050**  
Date collected **2020-04-20**

Pulse sequence **gHSQC**  
Solvent **cdcl3**

Temperature **25**  
Spectrometer **Agilent-NMR-inova500**

Study owner **vnmr2**  
Operator **vnmr2**

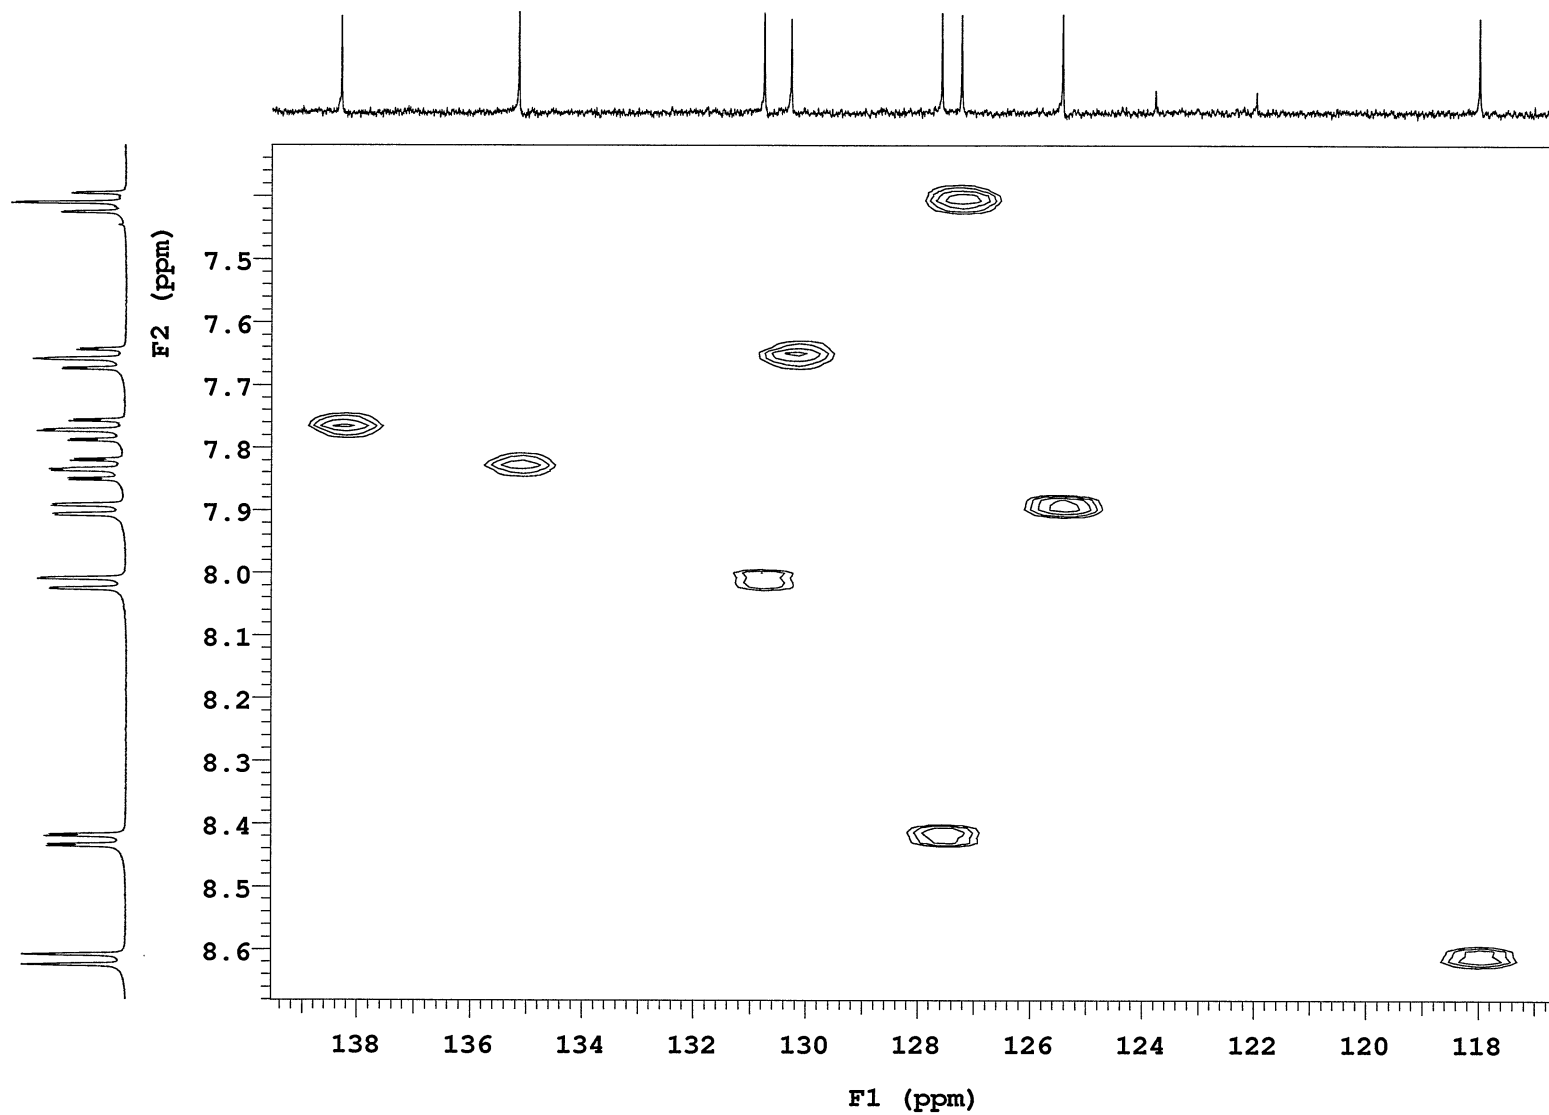

Sample Name SQL-050  
Date collected 2020-04-20

Pulse sequence gCOSY  
Solvent cdcl3

Temperature 25  
Spectrometer Agilent-NMR-inova500

Study owner vnmr2  
Operator vnmr2

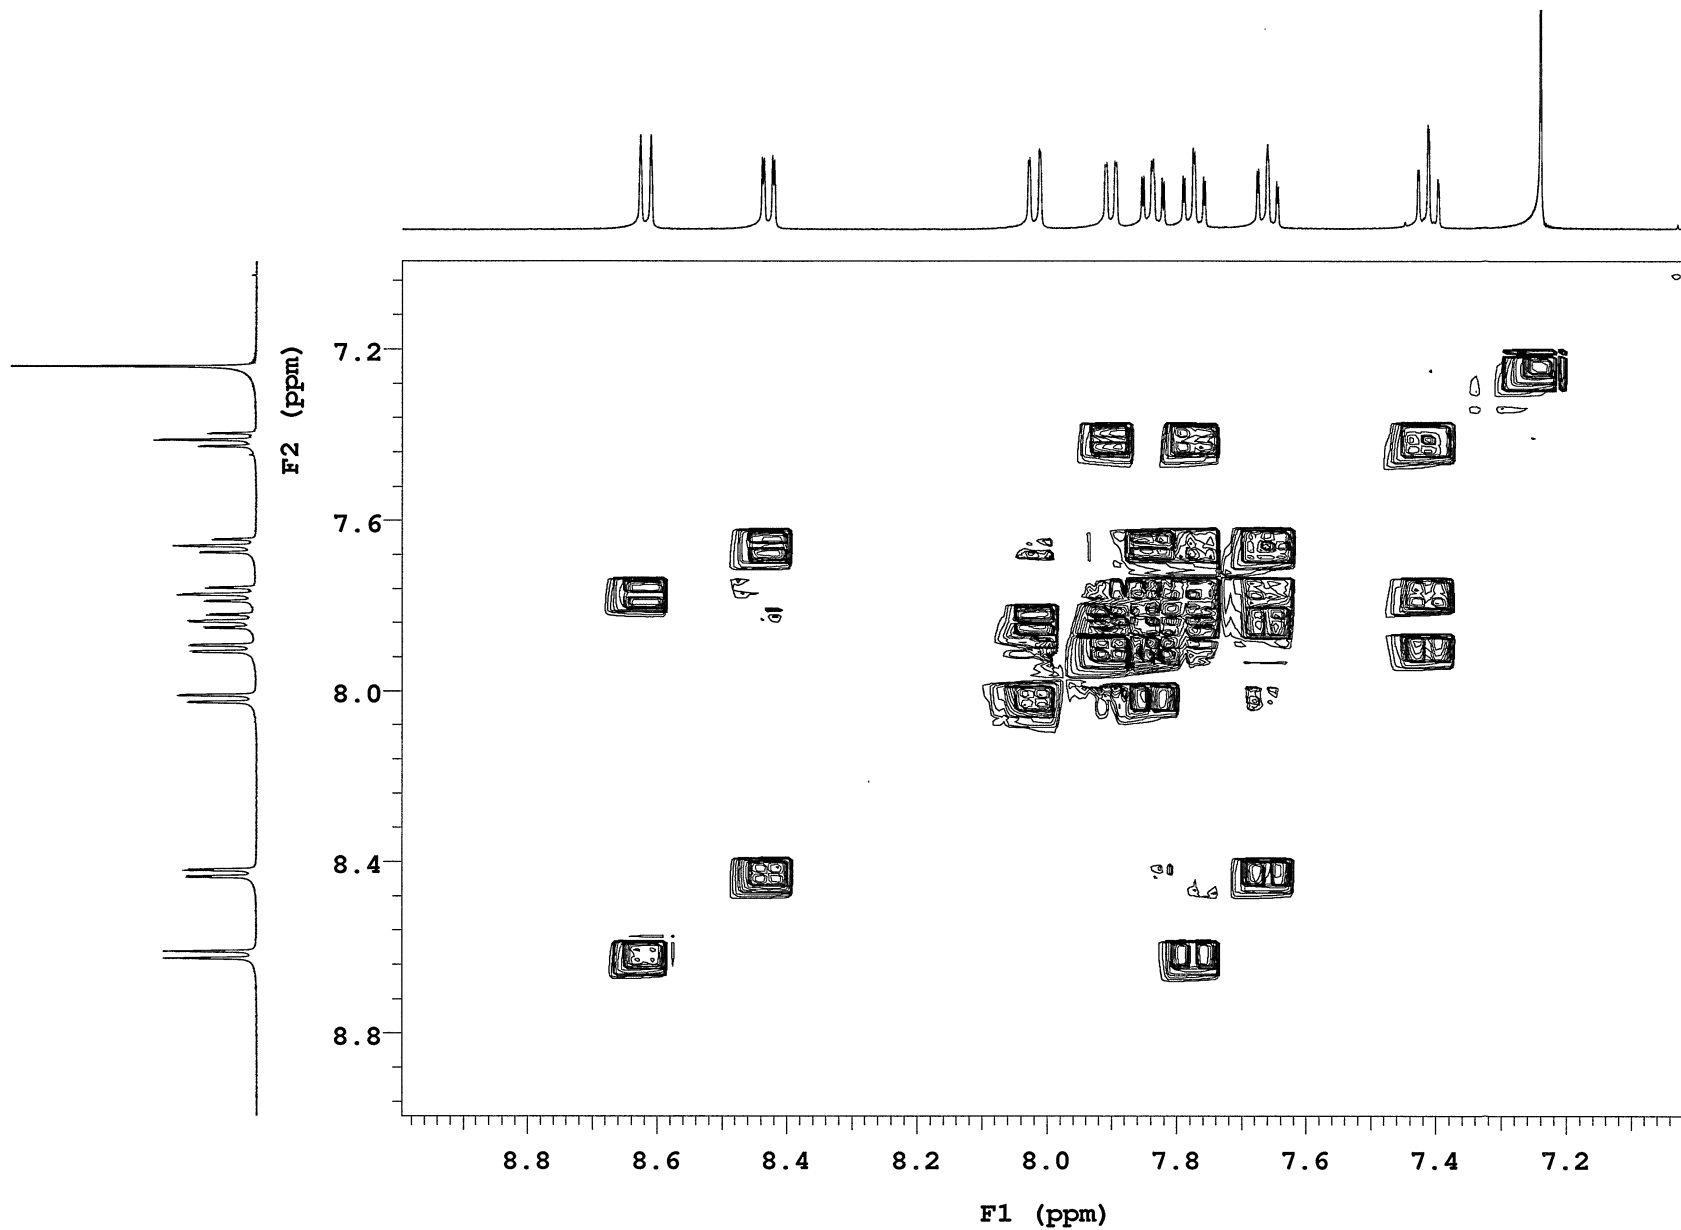

COSY of trypanthrin



Sample Name **SQL-050**  
Date collected **2020-04-20**

Pulse sequence **NOESY**  
Solvent **cdcl3**

Temperature **25**  
Spectrometer **Agilent-NMR-inova500**

Study owner **vnmr2**  
Operator **vnmr2**

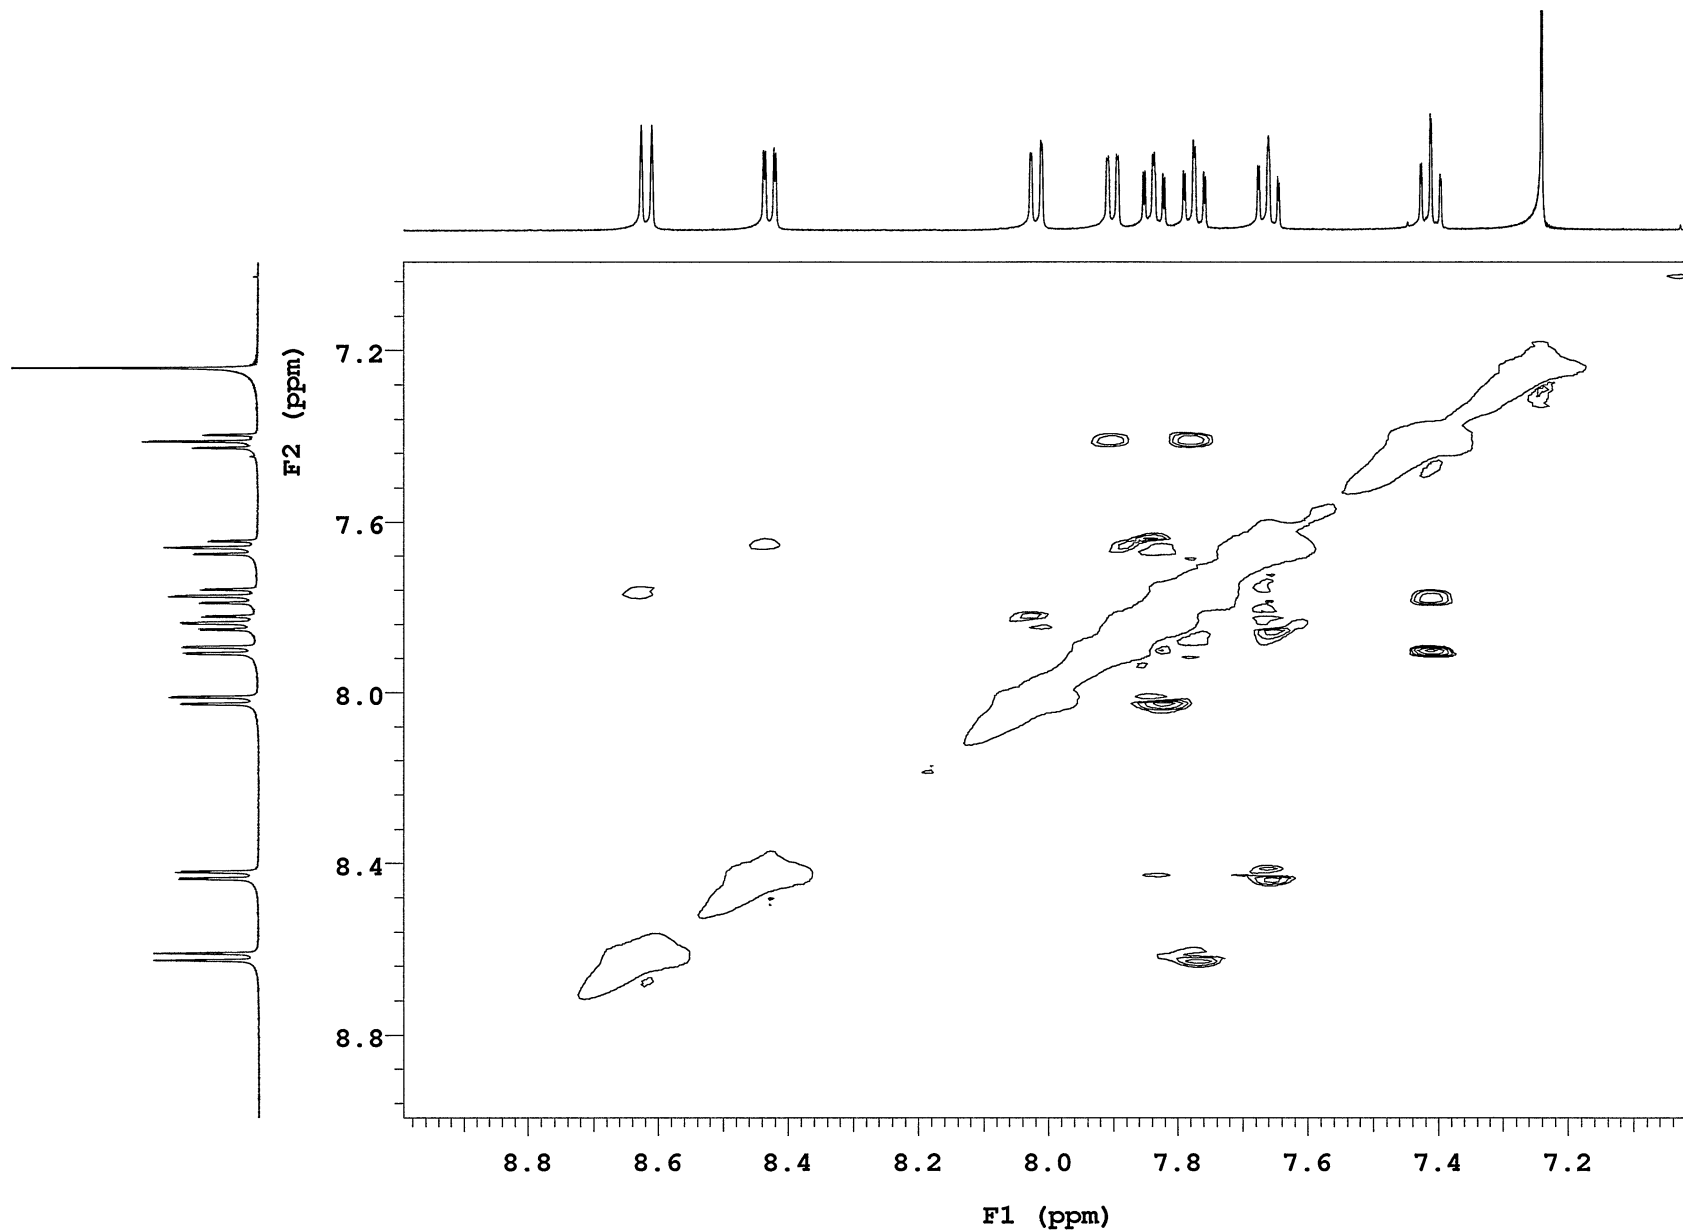

NOESY of tryptanthrin
